# Supplementary material
Source: PubMed Central journal article supplement (PMC9086935)
Supplement: jamaneurol-e220901-s00.pdf [file jamaneurol-e220901-s00.pdf]

## Data Sharing Statement

Oki. Efficacy and Safety of Ultrahigh-Dose Methylcobalamin in Early-Stage Amyotrophic Lateral Sclerosis. *JAMA Neurol*. Published May 09, 2022. doi:10.1001/jamaneurol.2022.0901

### Data

**Data available:** No

### Additional Information

**Explanation for why data not available:** We plan to conduct additional analysis of the clinical trial data including the double-blind period and open label extended period.
