# Supplementary material
Source: PubMed Central journal article supplement (PMC9086935)
Supplement: jamaneurol-e220901-s001.pdf [file jamaneurol-e220901-s001.pdf]

1  
2  
3  
4  
5  
6  
7  
8  
9  
10  
11  
12  
13  
14  
15  
16  
17  
18  
19  
20  
21  
22  
23  
24  
25  
26  
27  
28  
29  
30  
31  
32  
33  
34  
35  
36  
37  
38  
39  
40  
41  
42  
43  
44  
45  
46  
47

## Clinical Study Protocol

### Japanese Early-stage Trial of high-dose methylcobalamin for Amyotrophic Lateral Sclerosis (JETALS)

Study No.: E0302-TOK-763  
Study Phase: Phase III  
Investigational product: E0302  
Indication: Sporadic ALS or familial ALS

Coordinating Investigator (Representative): Yuishin Izumi  
Department of Neurology, Tokushima University Hospital

Coordinating investigator: Satoshi Kuwahara  
Department of Neurology, Chiba University Hospital

Version 7.0: Date created: June 26, 2020

**CONFIDENTIALITY STATEMENT:**

This document contains confidential information that is provided only to parties directly involved in this clinical study. It cannot be disclosed to a third party unless explained to the subject. Prior written approval by the coordinating investigator and investigational product provider is required when publishing or disclosing contents of this document to any third party.

48  
49  
50  
51  
52  
53  
54  
55  
56  
57  
58  
59  
60  
61  
62  
63  
64  
65  
66  
67  
68  
69  
70  
71  
72  
73  
74  
75  
76  
77  
78  
79  
80  
81  
82  
83  
84  
85  
86  
87  
88  
89  
90

[In case of emergency]

Coordinating Investigator (Representative): Yuishin Izumi  
Clinical Trial Coordination Office, Tokushima University Hospital  
(9:00-17:00 on weekdays) Phone: 81 88 633 7207  
(night-time/holiday) Phone: 81 90 8718 9982

91  
92

### List of abbreviations

| Abbreviations | Non-abbreviated                                |
|---------------|------------------------------------------------|
| ALS           | Amyotrophic Lateral Sclerosis                  |
| ALSAQ-40      | ALS Assessment Questionnaire-40                |
| ALSFRS-R      | ALS Functional Rating Scale-Revised            |
| ALT           | Alanine Aminotransferase                       |
| AST           | Aspartate Aminotransferase                     |
| Al-P          | Alkaline Phosphatase                           |
| BUN           | Blood Urea Nitrogen                            |
| CK            | Creatine Kinase (creatine phosphokinase)       |
| CMAP          | Compound Muscle Action Potential               |
| COPD          | Chronic Obstructive Pulmonary Disease          |
| FAS           | Full Analysis Set                              |
| FVC           | Forced Vital Capacity                          |
| GAD           | Gracile Axonal Dystrophy                       |
| GCP           | Good Clinical Practice                         |
| $\gamma$ -GTP | $\gamma$ -Glutamyl Transpeptidase              |
| IVH           | Intravenous Hyperalimentionation               |
| LDH           | Lactate Dehydrogenase                          |
| MMRM          | Mixed-effects Model with Repeated Measurements |
| MMT           | Manual Muscle Testing                          |
| MRC score     | Medical Research Council score                 |
| PEG           | Percutaneous Endoscopic Gastrostomy            |
| PPS           | Per Protocol Set                               |
| PT            | Preferred Term                                 |
| SOC           | System Organ Class                             |
| SOD1          | Superoxide Dismutase 1                         |
| WFN           | World Federation of Neurology                  |

|     |                   |                                                                                                 |    |
|-----|-------------------|-------------------------------------------------------------------------------------------------|----|
| 93  | TABLE OF CONTENTS |                                                                                                 |    |
| 94  | 1.                | OBJECTIVE.....                                                                                  | 12 |
| 95  | 2.                | HISTORY OF DEVELOPMENT (BACKGROUND INFORMATION).....                                            | 12 |
| 96  | 3.                | STUDY DESIGN .....                                                                              | 14 |
| 97  | 3.1.              | Study Design.....                                                                               | 14 |
| 98  | 3.2.              | Study Flow.....                                                                                 | 14 |
| 99  | 3.3.              | Discussion of Study Design, Including the Choice of Control Groups .....                        | 15 |
| 100 | 3.4.              | Sample Size and Study Period.....                                                               | 15 |
| 101 | 4.                | SELECTION OF STUDY POPULATION.....                                                              | 16 |
| 102 | 4.1.              | Diagnostic criteria.....                                                                        | 16 |
| 103 | 4.2.              | Severity Criteria for ALS.....                                                                  | 19 |
| 104 | 4.3.              | Eligibility Criteria.....                                                                       | 19 |
| 105 | 4.3.1.            | Inclusion Criteria .....                                                                        | 19 |
| 106 | 4.3.2.            | Exclusion Criteria .....                                                                        | 20 |
| 107 | 5.                | TREATMENT .....                                                                                 | 21 |
| 108 | 5.1.              | Identity of Investigational Product .....                                                       | 21 |
| 109 | 5.1.1.            | Chemical Name and Structural Formula of E0302.....                                              | 21 |
| 110 | 5.1.2.            | Comparator Drug.....                                                                            | 21 |
| 111 | 5.1.3.            | Drug Preparation.....                                                                           | 21 |
| 112 | 5.2.              | Investigational Drug Labeling and Packaging.....                                                | 21 |
| 113 | 5.2.1.            | Packaging.....                                                                                  | 21 |
| 114 | 5.2.2.            | Investigational Drug Labeling .....                                                             | 22 |
| 115 | 5.3.              | Storage of Investigational Drug.....                                                            | 22 |
| 116 | 5.4.              | Delivery of Investigational Drug to Study Institution .....                                     | 22 |
| 117 | 5.5.              | Administration of Investigational Drug.....                                                     | 23 |
| 118 | 5.5.1.            | Dose and Administration Method.....                                                             | 23 |
| 119 | 5.5.2.            | Method of Preparation and Administration.....                                                   | 23 |
| 120 | 5.5.3.            | Treatment Period.....                                                                           | 24 |
| 121 | 5.6.              | Storage and Prescription of Investigational Drug.....                                           | 25 |
| 122 | 5.6.1.            | Subjects who can attend the outpatient clinic .....                                             | 25 |
| 123 | 5.6.2.            | Subjects who cannot attend the outpatient clinic .....                                          | 25 |
| 124 | 5.7.              | Retrieval of Investigational drugs.....                                                         | 25 |
| 125 | 5.7.1.            | Retrieval of Unused and Used Investigational drugs during the Treatment Period .....            | 26 |
| 126 | 5.7.2.            | Retrieval of Unused and Used Investigational drugs during the Continuous Treatment Period ..... | 26 |
| 127 |                   | 26                                                                                              |    |
| 128 | 6.                | PRIOR AND CONCOMITANT THERAPY .....                                                             | 26 |
| 129 | 6.1.              | Prior Treatment.....                                                                            | 26 |
| 130 | 6.2.              | Concomitant Therapy .....                                                                       | 26 |
| 131 | 6.2.1.            | Prohibited Concomitant Drugs and Therapy .....                                                  | 26 |
| 132 | 6.2.2.            | Restricted Concomitant Drug .....                                                               | 26 |
| 133 | 6.2.3.            | Concomitant Therapy .....                                                                       | 27 |
| 134 | 7.                | INFORMED CONSENT .....                                                                          | 27 |
| 135 | 7.1.              | Preparation of Written Consent Form.....                                                        | 27 |
| 136 | 7.2.              | Obtaining Written Informed Consent .....                                                        | 27 |
| 137 | 8.                | ASSIGNMENT OF DRUGS, SUBJECT REGISTRATION, BLINDING .....                                       | 28 |
| 138 | 8.1.              | Randomization of Investigational drug.....                                                      | 28 |
| 139 | 8.2.              | Method of Assigning Subjects to Treatment Group.....                                            | 28 |
| 140 | 8.2.1.            | Procedures for Subject Registration and Investigational drug Assignment .....                   | 28 |
| 141 | 8.2.2.            | Method of Assignment.....                                                                       | 29 |
| 142 | 8.2.3.            | Confirmation of Assignment Status .....                                                         | 29 |
| 143 | 8.3.              | Blinding .....                                                                                  | 31 |
| 144 | 8.3.1.            | Confirmation of Indistinguishability .....                                                      | 31 |

|     |         |                                                                                      |    |
|-----|---------|--------------------------------------------------------------------------------------|----|
| 145 | 8.3.2.  | Key Code and Emergency Key Code .....                                                | 31 |
| 146 | 8.3.3.  | Confirmation of Seal Status after Retrieval of Investigational drugs .....           | 31 |
| 147 | 8.3.4.  | Securing Blindness of the Investigational drug and Urine Color .....                 | 31 |
| 148 | 8.4.    | Opening of Emergency Key Code .....                                                  | 31 |
| 149 | 9.      | STUDY SCHEDULE .....                                                                 | 32 |
| 150 | 9.1.    | Study Schedule .....                                                                 | 32 |
| 151 | 9.2.    | Investigation/Evaluation Items and Procedures in the Three Period .....              | 34 |
| 152 | 9.2.1.  | Observation Period .....                                                             | 34 |
| 153 | 9.2.2.  | Treatment Period (Week 0, 4, 8, 16, and Discontinuation of Study) .....              | 35 |
| 154 | 9.2.3.  | Continuous Treatment Period (Every 12 weeks, Completion or Discontinuation of Study) |    |
| 155 |         | 36                                                                                   |    |
| 156 | 10.     | EVALUATION .....                                                                     | 37 |
| 157 | 10.1.   | Person Injecting the Investigational drug and Person Conducting Evaluation .....     | 37 |
| 158 | 10.1.1. | Person in Charge of Efficacy Evaluation .....                                        | 37 |
| 159 | 10.1.2. | Person in Charge of the ALSFRS-R Evaluation .....                                    | 37 |
| 160 | 10.1.3. | Person in Charge of the Safety Evaluation .....                                      | 38 |
| 161 | 10.1.4. | Person Injecting the Investigational drug .....                                      | 38 |
| 162 | 10.2.   | Items and Method of Efficacy Evaluation .....                                        | 40 |
| 163 | 10.2.1. | ALSFRS-R.....                                                                        | 40 |
| 164 | 10.2.2. | Event Occurrence.....                                                                | 40 |
| 165 | 10.2.3. | %FVC .....                                                                           | 41 |
| 166 | 10.2.4. | Concentration of Homocysteine in the Blood.....                                      | 41 |
| 167 | 10.2.5. | MMT.....                                                                             | 41 |
| 168 | 10.2.6. | Grip Test .....                                                                      | 41 |
| 169 | 10.2.7. | Norris Scale .....                                                                   | 41 |
| 170 | 10.2.8. | ALSAQ-40.....                                                                        | 41 |
| 171 | 10.3.   | Items and Method of Safety Evaluation .....                                          | 41 |
| 172 | 10.3.1. | Clinical Laboratory Test .....                                                       | 41 |
| 173 | 10.3.2. | Electrocardiogram (ECG).....                                                         | 42 |
| 174 | 10.3.3. | Vital signs .....                                                                    | 42 |
| 175 | 10.3.4. | Adverse Events .....                                                                 | 42 |
| 176 | 10.4.   | Status of Riluzole Medication.....                                                   | 42 |
| 177 | 10.5.   | Status of Tracheotomy .....                                                          | 43 |
| 178 | 10.6.   | Status of Investigational drug Administration .....                                  | 43 |
| 179 | 10.7.   | Concomitant Treatment .....                                                          | 43 |
| 180 | 10.8.   | Premature Termination or Suspension .....                                            | 44 |
| 181 | 11.     | APPROPRIATENESS OF EFFICACY EVALUATION .....                                         | 44 |
| 182 | 12.     | ADVERSE EVENTS, SERIOUS ADVERSE EVENTS AND THEIR REPORTING.....                      | 45 |
| 183 | 12.1.   | Definition of Adverse Events.....                                                    | 45 |
| 184 | 12.1.1. | Adverse Events .....                                                                 | 45 |
| 185 | 12.1.2. | Adverse Events Associated with Abnormal Change in Laboratory Parameters .....        | 45 |
| 186 | 12.1.3. | Serious Adverse Events .....                                                         | 46 |
| 187 | 12.2.   | Evaluation of Adverse Events.....                                                    | 46 |
| 188 | 12.2.1. | Items of Adverse Events .....                                                        | 46 |
| 189 | 12.2.2. | Severity of Adverse Event .....                                                      | 46 |
| 190 | 12.2.3. | Seriousness of Adverse Event.....                                                    | 46 |
| 191 | 12.2.4. | Reasons for Causal Relationship between Adverse event and Investigational drug.....  | 47 |
| 192 | 12.2.5. | Outcome of Adverse Event.....                                                        | 47 |
| 193 | 12.2.6. | Causal Relationship of Adverse Events with Investigational drug .....                | 47 |
| 194 | 12.2.7. | Action Taken with Investigational drug.....                                          | 48 |
| 195 | 12.3.   | Response to Adverse Events .....                                                     | 48 |

|     |         |                                                                            |    |
|-----|---------|----------------------------------------------------------------------------|----|
| 196 | 12.4.   | Serious Adverse Events .....                                               | 48 |
| 197 | 12.4.1. | Reporting of Serious Adverse Events .....                                  | 48 |
| 198 | 12.5.   | Possible Side Effects.....                                                 | 51 |
| 199 | 12.6.   | Opening of Emergency Key Code .....                                        | 52 |
| 200 | 12.7.   | Opening of Emergency Key Code on the Request of Regulatory Authority ..... | 52 |
| 201 | 13.     | DISCONTINUATION OF INDIVIDUAL SUBJECTS .....                               | 53 |
| 202 | 13.1.   | Criteria for Discontinuation of Study .....                                | 53 |
| 203 | 13.2.   | Procedures for Discontinuation of Study.....                               | 53 |
| 204 | 14.     | COMPLETION, PREMATURE TERMINATION OR SUSPENSION OF STUDY .....             | 53 |
| 205 | 14.1.   | Completion of Study.....                                                   | 53 |
| 206 | 14.2.   | Premature Termination or Suspension of Study .....                         | 54 |
| 207 | 14.2.1. | Criteria for Premature Termination or Suspension .....                     | 54 |
| 208 | 14.2.2. | Procedures for Premature Termination or Suspension.....                    | 54 |
| 209 | 15.     | PROTOCOL COMPLIANCE, DEVIATION/AMENDMENT, AND REVISION .....               | 54 |
| 210 | 15.1.   | Protocol Compliance .....                                                  | 54 |
| 211 | 15.2.   | Protocol Deviation or Amendment .....                                      | 54 |
| 212 | 15.3.   | Revision of Protocol and Case Report Form .....                            | 55 |
| 213 | 16.     | CASE REPORT FORM.....                                                      | 55 |
| 214 | 16.1.   | Preparation and Reporting CRF.....                                         | 55 |
| 215 | 16.2.   | Important Points in Preparing CRF .....                                    | 55 |
| 216 | 17.     | DIRECT ACCESS TO SOURCE DOCUMENTS .....                                    | 55 |
| 217 | 17.1.   | Identification of Source Data.....                                         | 55 |
| 218 | 17.2.   | Direct Access to Source Documents by Monitor.....                          | 56 |
| 219 | 17.2.1. | Access to Source Documents.....                                            | 56 |
| 220 | 17.2.2. | Monitoring.....                                                            | 56 |
| 221 | 18.     | STATISTICAL ANALYSIS METHOD.....                                           | 56 |
| 222 | 18.1.   | Determination of Sample Size .....                                         | 56 |
| 223 | 18.2.   | Statistical Analysis Plan.....                                             | 57 |
| 224 | 18.2.1. | Definition of Analysis Sets .....                                          | 57 |
| 225 | 18.2.2. | Statistical Analysis Method .....                                          | 61 |
| 226 | 18.2.3. | Important Points of Analysis.....                                          | 63 |
| 227 | 18.3.   | Changes to Analysis Plan and Additional Analysis .....                     | 64 |
| 228 | 19.     | QUALITY CONTROL AND QUALITY ASSURANCE OF CLINICAL STUDY .....              | 64 |
| 229 | 19.1.   | Quality Control and Quality Assurance for CRF Data .....                   | 64 |
| 230 | 19.2.   | Quality Control .....                                                      | 64 |
| 231 | 19.3.   | Quality Assurance.....                                                     | 65 |
| 232 | 19.3.1. | Audit.....                                                                 | 65 |
| 233 | 20.     | RETENTION OF RECORDS .....                                                 | 65 |
| 234 | 20.1.   | Study Institutions.....                                                    | 65 |
| 235 | 20.2.   | Organizer of Institutional Review Board.....                               | 65 |
| 236 | 20.3.   | Head of Study Institution.....                                             | 65 |
| 237 | 20.4.   | Investigator .....                                                         | 65 |
| 238 | 21.     | ETHICS .....                                                               | 65 |
| 239 | 21.1.   | Institutional Review Board .....                                           | 65 |
| 240 | 21.1.1. | Review of Study Conduct.....                                               | 65 |
| 241 | 21.2.   | Ethical Conduct of Clinical Study .....                                    | 66 |
| 242 | 21.2.1. | GCP Compliance .....                                                       | 66 |
| 243 | 21.2.2. | Protection of Human Rights .....                                           | 66 |
| 244 | 21.2.3. | Protection of privacy.....                                                 | 66 |
| 245 | 22.     | STUDY COST AND COMPENSATION/INDEMNITY OF HEALTH INJURY .....               | 66 |
| 246 | 22.1.   | Disclosure and Confidentiality .....                                       | 66 |
| 247 | 22.2.   | Study Cost.....                                                            | 66 |

|     |       |                                                                 |                                     |
|-----|-------|-----------------------------------------------------------------|-------------------------------------|
| 248 | 22.3. | Compensation/Indemnity of Study-related Health Injury.....      | 67                                  |
| 249 | 23.   | TRIAL REGISTRATION, ATTRIBUTION AND PUBLICATION OF RESULTS..... | 67                                  |
| 250 | 23.1. | Clinical Trial Registry.....                                    | 67                                  |
| 251 | 23.2. | Agreement on Attribution and Publication of Results .....       | 67                                  |
| 252 | 24.   | STUDY ADMINISTRATIVE STRUCTURE .....                            | 67                                  |
| 253 | 25.   | REFERENCES .....                                                | 67                                  |
| 254 | 26.   | APPENDIX .....                                                  | <b>ERROR! BOOKMARK NOT DEFINED.</b> |
| 255 | 27.   | DOCUMENT CHANGE HISTORY .....                                   | 87                                  |
| 256 |       |                                                                 |                                     |
| 257 |       |                                                                 |                                     |

## Overview

[Schema]

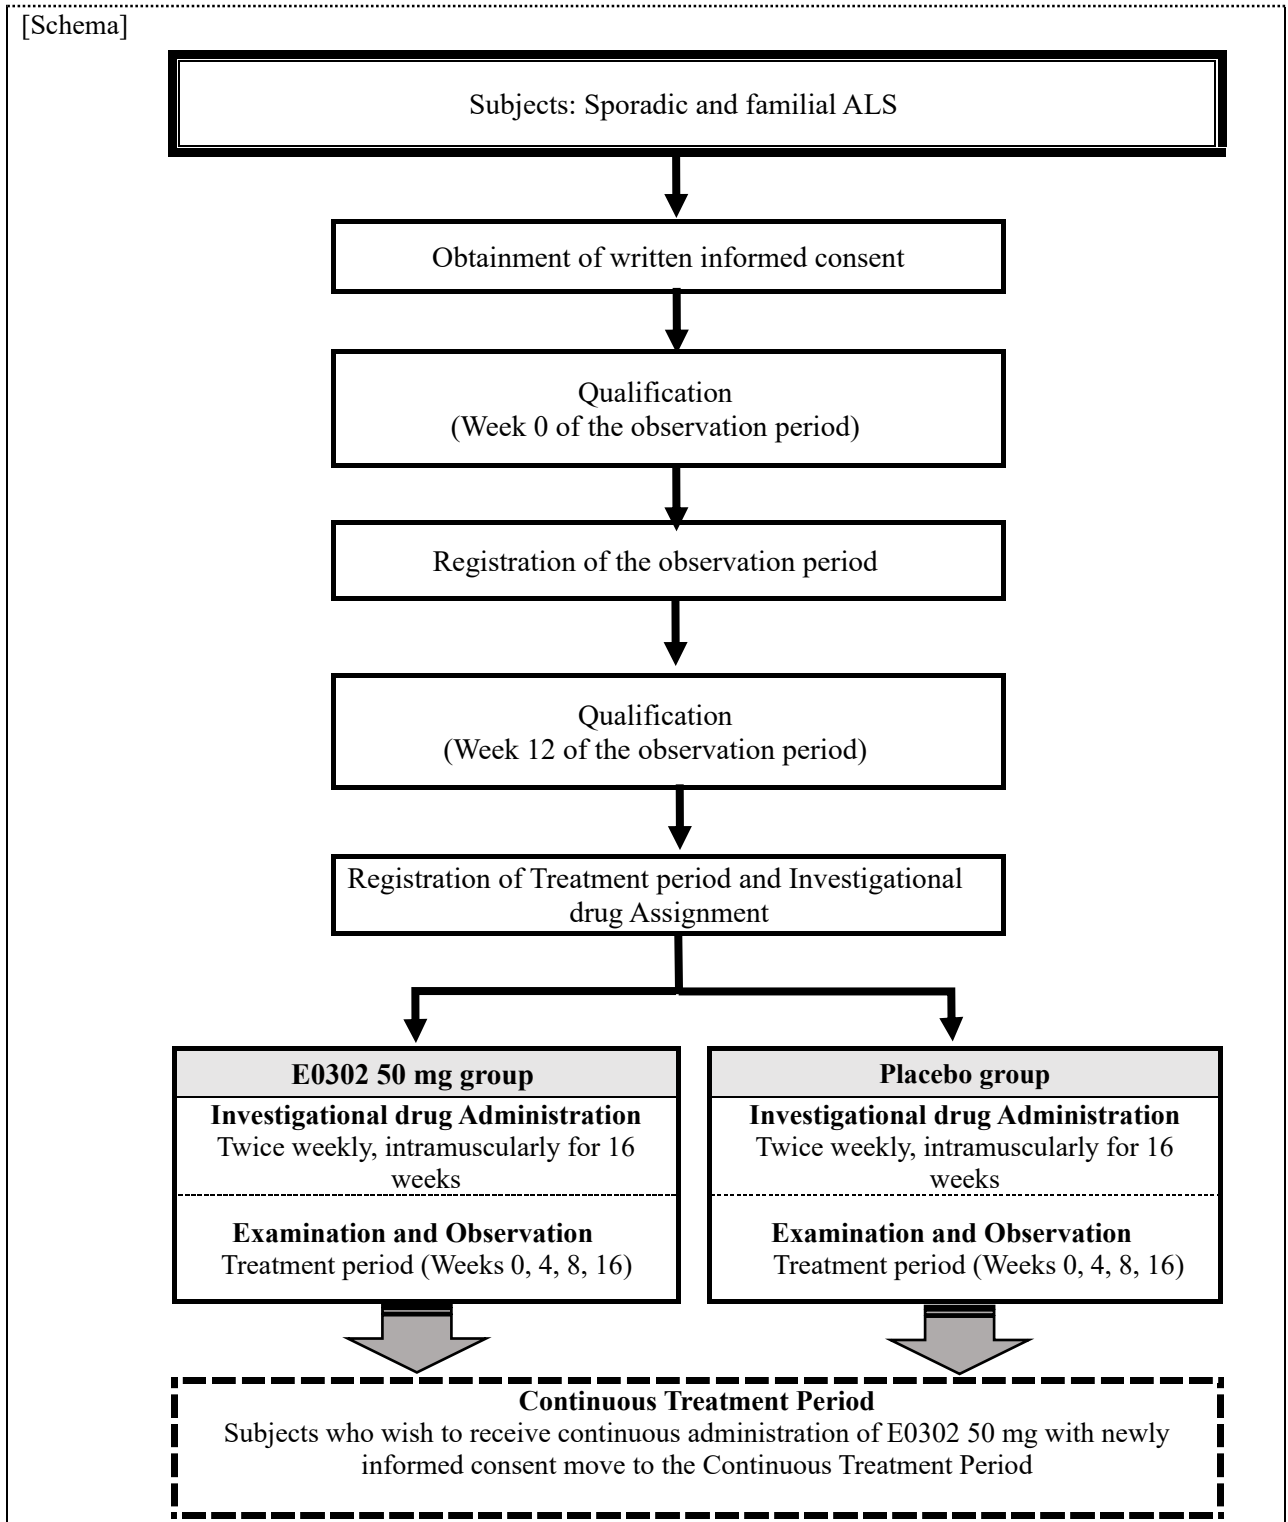



**[The purpose of this clinical trial]**

To evaluate the superiority of high-dose intramuscular E0302 (mecobalamin 50 mg) compared with placebo in amyotrophic lateral sclerosis (ALS) patients, as an indicator of the Japanese version of the Revised ALS Functional Rating Scale (ALSFRS-R).

**[Subjects]**

Eligible patients: Those who meet the following inclusion criteria (1)-(4), (6) and (7) at the initiation of the observation period, and (3) and (5)-(7) at the completion of the observation period, and do not meet any of the exclusion criteria (1)-(14) at the initiation of the observation period, and (1)-(4), (7)-(11), (13)-(14) at the completion of the observation period.

Inclusion criteria: Patients who meet all of the following criteria will be included.

- (1) Patients who provide written informed consent to participate in the study.
- (2) Patients aged 20 years or older at the time of obtainment of informed consent
- (3) Patients diagnosed with isolated or familial ALS who meet the definite, the probable, or the probable-laboratory-supported updated Awaji criteria
- (4) Patients within one year of disease onset at the initiation of the observation period
- (5) Patients with 1-to 2-point decrease in the ALSFRS-R total score during the observation period (12 weeks)
- (6) Patients with severity 1 or 2 according to the severity criteria of ALS
- (7) Ambulatory patients

Exclusion criteria: Patients who meet any one of the following criteria will be excluded.

- (1) Patients undergoing tracheostomy
- (2) Patients with a history of non-invasive respiratory support
- (3) Patients with % Forced vital capacity (%FVC)  $\leq$  60%
- (4) Patients with chronic obstructive pulmonary disease (COPD)
- (5) Patients with neurological symptoms due to vitamin B12 deficiency
- (6) Patients receiving edaravone within four weeks prior to enrollment in the observation period
- (7) Patients receiving riluzole or have changed or discontinued the dosage after obtaining informed consent
- (8) Patients with cognitive impairment
- (9) Pregnant women or patients who may be pregnant
- (10) Patients with serious respiratory, cardiovascular, or hepatorenal disease
- (11) Patients with malignancies
- (12) Patients who participated in another clinical trial within 12 weeks prior to the acquisition of consent
- (13) Patients with a history or concomitant history of drug allergy or severe allergic disease (anaphylactic shock, etc.)
- (14) Patients for whom the principal investigator or sub-investigator judges their participation in the study to be inappropriate

**[Sample Size and Duration]**

The target number of subjects: 128 (64 in the placebo group and 64 in the E0302 - 50 mg group)

Planned study period: October 2017 to March 2022 (planned)

(If no significant difference is found in the primary endpoint, the study will be terminated at that time.)

Planned period for case registration: October 2017 to October 2019 (planned)

Period for each subject: From the date of obtainment of informed consent to Week 16 of the Treatment period (subjects wishing to continue treatment beyond Week 16 move to the Continuous treatment period (until March 2022) after obtaining informed consent.

**[Design of clinical trials]**

A multicenter, randomized, placebo-controlled, double-blinded, parallel-group-controlled trial.

## Study schedule

### Target: Sporadic or familial ALS

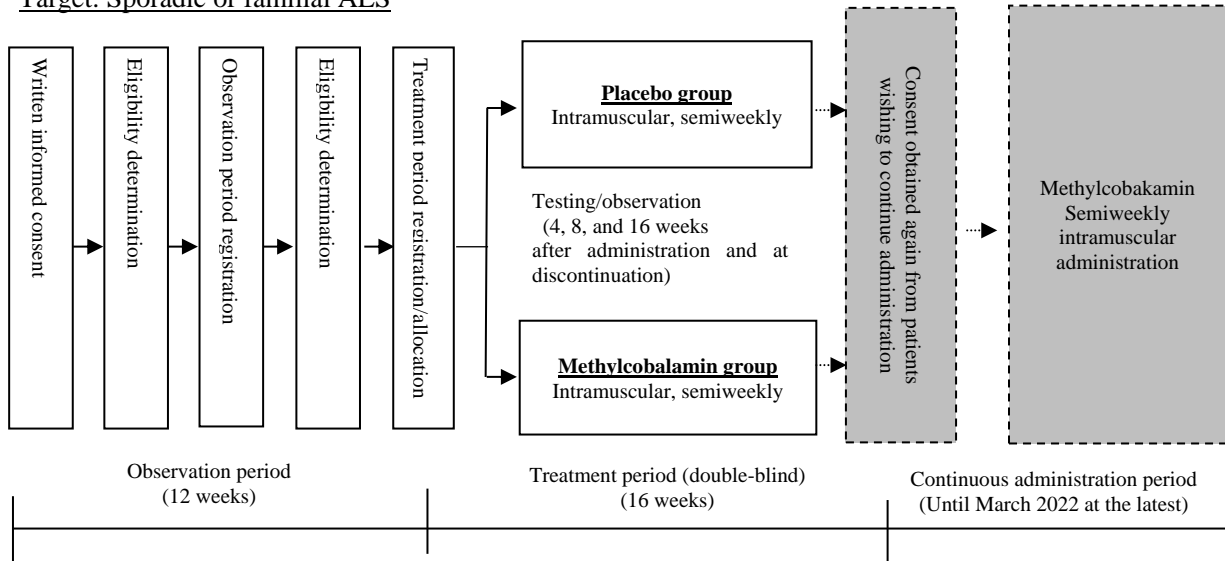

### [Investigational drug]

Investigational product: E0302 (generic name: mecobalamin)

Control: Placebo (white lyophilized mass or powder without mecobalamin)

### [Dosage and method of administration]

E0302 - 50 mg or placebo will be administered intramuscularly twice weekly from the initial day of administration until the completion of the 16-week Treatment period.

Subjects who wish to continue treatment beyond Week 16 of the Treatment period will enter the Continuous treatment period and receive an intramuscular dose of E0302 - 50 mg until March 2022.

### [Endpoint]

#### 1) Efficacy endpoint

Main outcome measurements:

Change in the ALSFRS-R total score from the date of randomization to Week 16 of treatment

Secondary outcome measurements:

Change in %FVC, change in the concentration of homocysteine in the blood, change in Manual muscle tet (MMT) total score, change in grip strength (right and left, respectively), change in Norris scale total score, and change in ALS Assessment Questionnaire-40 (ALSAQ 40) total score from the date of randomization to event (all-day wear of non-invasive respiratory support device, wear of invasive respiratory support device, or death).

#### 2) Safety endpoint

Adverse events, laboratory tests, and vital signs.

#### 3) Endpoints in the Continuous treatment period

Time from the date of allocation to the event (all-day non-invasive respiratory support, invasive ventilator placement or death), change in ALSFRS-R total score, laboratory tests, vital signs, adverse events.

### [Statistical Methods]

#### 1) Efficacy analysis

The superiority of the treatment in terms of the primary endpoint (i.e., change in ALSFRS-R total score from the date of randomization to 16 weeks of treatment) to placebo will be tested. In the Mixed-effects Model with

Repeated Measurements (MMRM) analysis, a linear model is fitted with the covariance structure of error variance as the unstructured (unstructured) with the fixed effect in the treatment group, time point, minimization factor, and interaction of the treatment group and time point as the covariate of ALSFRS-R total score of the date of allocation as the covariate. Differences are considered significant if the lower boundary of the 95% least-squares mean confidence interval for the change in ALSFRS-R total score at Week 16 compared between the placebo and E0302-50 mg groups is  $>0$ . Changes in ALSFRS-R at Weeks 4 and 8 of the Treatment period will be tested according to Week 16. Time-course graphs of least squares mean  $\pm$  SEM obtained by MMRM analysis are also plotted for each group. Summary statistics for change from the date of allocation for each group and time point (including worst time) will also be calculated.

For the time to event of the secondary endpoint, the log-rank test p-value will be calculated for comparison between groups. Survival curves will be calculated for each group using the Kaplan–Meier method. Survival rates at each time point will be calculated with standard error using Greenwood's formula (as appropriate) to calculate the corresponding 95% confidence interval. For each time point, tests and analyses will be performed according to the primary endpoints for changes in the concentration of homocysteine in the blood, change in %FVC, change in MMT total score, change in grip strength (right and left, respectively), change in Norris scale total score, and change in ALSAQ 40 total score.

## 2) Safety analysis

The number of subjects with adverse events/reactions and the number of adverse events will be tabulated for each treatment group, and the incidence of adverse events/reactions will be calculated. In addition, the placebo group and the E0302-50 mg group will be compared for the subject-specific incidence of adverse events/adverse reactions using Fisher's exact test, and analyses will be performed for causality and severity.

For laboratory values, the incidence of abnormal changes will be calculated for each treatment group, and the placebo group will be compared with the E0302-50 mg group using Fisher's exact test. For laboratory values and vital signs, the change (or change) from the values at Week 12 for each treatment group will be calculated and compared within groups using Wilcoxon signed-rank test (for one sample). The placebo group will be compared with the E0302-50 mg group using the Wilcoxon rank-sum test (two samples).

259

260

261 **1. OBJECTIVE**

262 To evaluate the dose-response to treatment with E0302 and verify its superiority over placebo by  
263 conducting a multicenter, randomized, parallel-group, double-blinded, comparative study in patients with  
264 ALS, regarding a variation in the Japanese-language version of the ALS Functional Rating Scale-Revised  
265 (ALSFRRS-R). The safety of E0302 will also be examined.  
266

267 **2. HISTORY OF DEVELOPMENT (BACKGROUND INFORMATION)**

268 ALS is an intractable neurodegenerative disease of unknown origin that progressively presents various  
269 symptoms through the failure of upper and lower motor neurons and skeletal muscle force lowering. It  
270 develops until the spontaneous motor function, including respiratory function, is completely lost. Usually,  
271 loss of respiratory function or severe dysphagia results in death within 3–6 years from the time of onset.  
272 Presently, there is no established treatment for this disease.

273 The pathomechanisms of ALS are only partially understood. The only known cause of ALS is mutations  
274 in the Cu/Zn superoxide dismutase 1 (SOD1) gene.<sup>1</sup> Mutation in the SOD1 gene result in the expression of  
275 mutant proteins in motor neurons. However, approximately 1% to 2% of all patients with SOD1 mutations  
276 have ALS, accounting for approximately 20% of familial ALS cases. The molecular mechanism of the  
277 disease state of familial ALS caused by mutations in the SOD1 remains unknown.

278 In addition, the prevalence of ALS is 2-7 per 100,000 population, and the incidence is approximately 1  
279 per 100,000 population.<sup>2</sup> The number of patients identified in Japan was 9,434 (the number of certificates  
280 issued for patients receiving treatment for specified diseases in FY 1995).<sup>3</sup>

281 Currently, riluzole and edaravone are the only approved drugs worldwide for the treatment of ALS. A  
282 meta-analysis of clinical trials investigating riluzole conducted in the United States and Europe showed a  
283 survival benefit of approximately three months in the riluzole arm. On the other hand, a clinical trial  
284 conducted in Japan did not show a significant difference in the time to a certain disease progression  
285 (independent ambulation, abolition of arm function, tracheostomy, respirator placement, tube feeding, or  
286 death) between the riluzole and placebo groups and failed to demonstrate efficacy. However, in view of the  
287 results of clinical trials in Europe and the United States and the social necessity, the drug received early  
288 conditional approval in December 1998.<sup>4</sup> Edaravone exhibits free radical-scavenging action, and the  
289 improvement on the neurological syndrome, activity of daily living failure, dysfunction with the cerebral  
290 infarction acute phase was already manufactured as the indication, and the effect which protects the  
291 motoneuron by suppressing the generation of the rising free radical in the disease state of ALS, and delays  
292 the progress of the muscle atrophy was expected, and the clinical trial was conducted. In clinical trials,  
293 significant differences were observed between the placebo and drug groups in the degree of change in  
294 ALSFRS-R scores, an indicator of functional impairment. The results of time-course evaluations showed  
295 that the progression of functional impairment could be expected to be delayed by approximately two  
296 months. Therefore, it was approved in June 2015 under the "Conditional Approval."<sup>5</sup>

297 Numerous drugs have been evaluated in clinical trials in patients with ALS. However, with the  
298 exception of riluzole and edaravone, none of those have been approved. There is hope for the development  
299 of agents that prolong patient survival or improve clinical symptoms.

300 Mecobalamin is an active form of vitamin B12 that has been used in Japan at an adaptive dose of 0.5 mg  
301 once as a treatment for peripheral neuropathy and megaloblastic anemia. On the other hand, *in-vitro* and *in-*  
302 *vivo* studies have suggested that high doses of mecobalamin may exert a protective effect against  
303 neurodegeneration. Long-term treatment of cultured cerebral cortical nerve cells and cultured retinal nerve  
304 cells with mecobalamin inhibited glutamate-induced neuronal cell death.<sup>6, 7</sup> In addition, in the acrylamide  
305 neuropathy model, faster recovery of compound muscle action potentials (CMAP) was observed in the high-  
306 dose mecobalamin group compared with the control (saline) group. However, the recovery rate reported in  
307 the low-dose mecobalamin group did not differ from that observed in the control group.<sup>8</sup> Furthermore, it was  
308 suggested that mecobalamin promoted regeneration of degenerating motor nerve terminals in GAD mice.<sup>9</sup>

309 Some clinical studies have suggested a clinical effect of high-dose mecobalamin in patients with ALS.<sup>10-</sup>  
310 <sup>12</sup> Following repeated intramuscular administration of mecobalamin at 0.5 or 25 mg/day for 14 days in 24  
311 ALS patients, CMAP amplitudes at four weeks (2 weeks after completion of treatment) were significantly

312 increased in the 25 mg group compared with baseline ( $P = 0.038$ , paired t-test)<sup>10</sup>. When mecobalamin was  
313 administered intramuscularly at doses of 0.5 or 50 mg/day for 14 days in 21 patients with ALS, there was a  
314 tendency toward efficacy in the 50 mg group ( $P = 0.056$ , paired t-test) in the modified Medical Research  
315 Council score (MRC score) after six weeks (4 weeks after completion of administration).<sup>11</sup> In addition, 41  
316 patients with ALS received mecobalamin 50 mg (repeated IM twice weekly) versus no mecobalamin in an  
317 open, non-randomized, controlled trial. Mean survival or time to ventilator use was  $14.7 \pm 11.7$  months in  
318 the 50 mg group (18 subjects) versus  $17.7 \pm 9.0$  months in the untreated group (16 subjects). However, the  
319 Kaplan–Meier survival curves tended to be better in the 50 mg group (February 2002,  $P = 0.0858$ , log-rank  
320 test).<sup>11</sup> Although all patients in the non-treatment group expired, 11 patients in the 50 mg group continued  
321 to receive treatment. The mean survival time or time to respirator use was significantly longer in the 50 mg  
322 group at the end of April 2004 ( $27.7 \pm 19.8$  months) ( $P = 0.023$ , log-rank test).<sup>12</sup>

323 On the basis of the above-mentioned non-clinical and clinical research results, high-dose mecobalamin is  
324 a potentially useful therapy in the treatment of ALS.

325 In preclinical safety studies (single-and repeated-dose toxicity), mecobalamin was not severely toxic in  
326 any species, and there were no relevant findings in terms of genotoxicity, reproduction/developmental  
327 toxicity, or antigenicity. In safety pharmacological studies, there were no adverse effects observed on the  
328 central nervous system, cardiovascular system, or respiratory system.

329 A Phase I single-dose study performed in the United Kingdom (E0302-E044-001) demonstrated the safety  
330 and tolerability of single intramuscular administration of mecobalamin at doses of 25, 50, or 75 mg in healthy  
331 Japanese and Caucasian male and female adults. Single-dose pharmacokinetic parameters showed dose  
332 linearity, and pharmacokinetic parameters were similar between the Japanese and Caucasian participants.  
333 Subsequently, a Phase I repeat-dose study also performed in the United Kingdom (E0302-E044-002)  
334 demonstrated the safety and tolerability of repeated intramuscular administration of mecobalamin at doses  
335 of 25 or 75 mg in healthy Japanese and Caucasian male and female adults for seven days. Pharmacokinetic  
336 parameters after repeated administration showed similar results to those obtained from the single-dose study.  
337 There was no accumulation observed after repeated administration.

338 On the basis of the above evidence, high-dose mecobalamin may be useful in the treatment of ALS, and  
339 the safety and pharmacokinetic results were favorable in Phase I clinical studies. A Phase II/III study (E0302-  
340 J081-761) involving Japanese ALS patients was conducted by Eisai Co., Ltd. (hereinafter Eisai Co., Ltd.).  
341 The results of this study failed to show superiority in terms of the primary efficacy endpoint (change in  
342 ALSFRS-R total score from the completion of the observation period to Week 16 of the Treatment period),  
343 although there was a trend toward greater efficacy in the mecobalamin 25 mg and 50 mg groups versus the  
344 placebo group. On the other hand, in the subgroup of subjects with ALS onset  $\leq 12$  months (48 subjects in  
345 the placebo group, 54 subjects in the 25 mg group, and 42 subjects in the 50 mg group), dose-response  
346 prolonged the time to the event and reduced the ALSFRS-R total score. However, the results of the subgroup  
347 analyses, the high efficacy in ALS patients who were diagnosed early and enrolled in the study were  
348 considered to be clinically meaningful. In addition, one death from cardiac arrest was reported as a serious  
349 adverse reaction in the mecobalamin 50 mg group. The event was considered by the investigator to be "due  
350 to myocardial infarction, arrhythmia, etc., but it was difficult to determine the cause of death. The event was  
351 most likely not related to the study treatment but occurred during the study treatment period. The event could  
352 not be completely ruled out." The event was considered "possibly related to the investigational drug." On  
353 the contrary, the sponsor considers it difficult to assess the causal relationship to the investigational drug  
354 because the cause of death has not been identified. In that study, although the incidence of adverse events  
355 was high, the incidence of adverse reactions was limited. Moreover, there were no obvious differences in  
356 the incidence of adverse events or adverse reactions between the placebo, 25 mg, and 50 mg groups, and  
357 there were no problems associated with the safety of intramuscular administration of mecobalamin 25 mg  
358 or 50 mg. In addition, a Phase III clinical study (E0302-J081-762) was conducted by Eisai Co., Ltd. as an  
359 extension study of Phase II/III study (E0302-J081-761) to investigate the safety and efficacy of continuous  
360 long-term administration of E0302 - 50 mg in ALS patients. From the results of the 52 weeks assessment by  
361 the cut-off point (31 October 2014), there was no particular concern regarding the safety of long-term  
362 administration. The results of survival, cumulative event rate, ALSFRS-R, and %FVC suggested that E0302  
363 maintains its inhibitory effect on the progression of ALS.

364 On the basis of the results of Phase II/III study conducted by Eisai Co., Ltd., we planned to perform a  
 365 multicenter, randomized, placebo-controlled, double-blinded, parallel-group study with the primary  
 366 endpoint of change in the ALSFRS-R total score from the date of allocation to Week 16. The study will  
 367 include patients with ALS who had developed ALS within one year after the onset of symptoms at the  
 368 initiation of the observation period and had a 1-2-point decrease in the total ALSFRS-R score during the  
 369 observation period (12 weeks). In addition, subjects who wish to continue treatment beyond Week 16 of the  
 370 Treatment period were allowed to continue treatment with E0302 - 50 mg by moving to the Continuous  
 371 treatment period until March 2022.

372  
 373

### 374 3. STUDY DESIGN

#### 375 3.1. Study Design

376 A multicenter, randomized, placebo-controlled, double-blinded, parallel-group-controlled trial

377

#### 378 3.2. Study Flow

Target: Sporadic or familial ALS

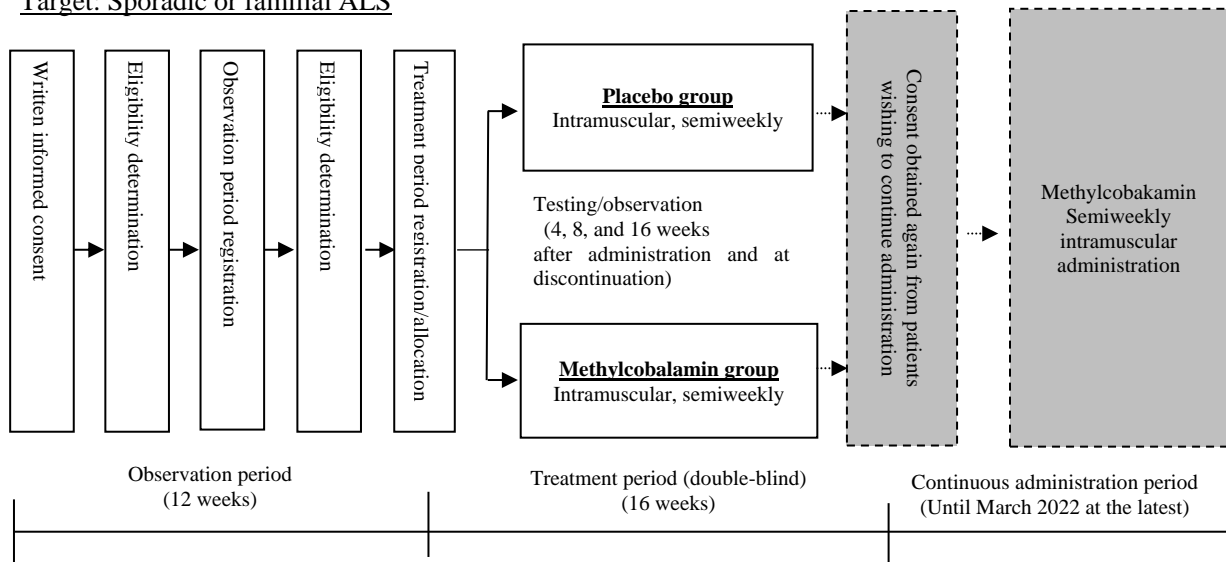

379  
 380

**Figure 3-1 Schematic of Study Conduct**

381 This study consists of three periods: the observation period, Treatment period, and Continuous treatment  
 382 period (see Figure 3-1 Summary of Study Conduct).

383 The investigator or sub-investigator will determine eligibility at the initiation of the observation period  
 384 and enroll subjects in the 12-week observation period following the obtainment of written consent to  
 385 participate in the study (see section 8.2.1 "Procedures for Subject Enrollment and Assignment of  
 386 Investigational Products"). The investigator or sub-investigator will determine eligibility at the completion  
 387 of the observation period after a 12-week follow-up period.8.2.1

388 The registration center will assign subjects who are eligible at the completion of the observation period  
 389 to either the placebo or E0302 - 50 mg groups by dynamic allocation (see 8.2.2 "Assignment Procedure").  
 390 These patients will be enrolled in the Treatment period.

391 The Treatment period is 16 weeks. During this period, to ensure blinding, the administration of the  
 392 investigational drug, efficacy evaluation, safety evaluation, and ALSFRS-R evaluation will be performed  
 393 by independent personnel at the study site. The evaluators of the efficacy, ALSFRS, and safety will  
 394 perform the required assessments at 4, 8, and 16 weeks after the initiation of treatment, at the time of the

395 event, or at the time of discontinuation. The Continuous treatment period shall be until March 2022. In the  
396 Continuous treatment period, independent evaluation is not required, and all evaluations, surveys, and  
397 administration of the investigational product are permitted by the principal investigator and others.  
398

### 399 **3.3. Discussion of Study Design, Including the Choice of Control Groups**

#### 400 1) Reason for the placebo-controlled comparative study

401 Riluzole and edaravone have been approved for the treatment of ALS. A meta-analysis of clinical trials  
402 investigating riluzole conducted in Europe and the United States showed a survival benefit of approximately  
403 three months in the riluzole group. However, a clinical trial conducted in Japan failed to demonstrate efficacy,  
404 without significant difference observed in the time to disease progression (independent ambulation, abolition  
405 of arm function, tracheostomy, respirator placement, tube feeding, or death) between the riluzole and placebo  
406 groups. However, in view of the results of clinical trials in Europe and the United States and the social  
407 necessity, the drug received early conditional approval in December 1998. In light of this background, the  
408 efficacy of riluzole has not been clarified, at least in Japan. Although edaravone was approved in June 2015,  
409 the number of ALS cases treated with this drug has not been determined, and thus, it is difficult to state that  
410 edaravone has been established as a standard treatment for ALS. Therefore, it is considered inappropriate as  
411 a comparator in this study. Hence, it is reasonable to conduct this investigation as a placebo-controlled study  
412 to verify the efficacy of E0302 objectively. In addition, since significant difference versus placebo could not  
413 be shown in the clinical Phase II/III study of E0302, it was judged necessary to demonstrate the superiority  
414 to placebo again. Thus, the placebo was set as a control. However, considering the ethical aspects of  
415 treatment, the subjects receiving riluzole at the time of obtainment of informed consent will be allowed to  
416 continue treatment, provided that its daily dose is not changed from the time of informed consent obtainment  
417 to the completion of the Treatment period or at the time of discontinuation, in principle.  
418

#### 419 2) Reasons for setting the observation period prior to commencement of administration of the 420 investigational drug

421 ALS is a progressive disease. This clinical study evaluates the inhibitory effect of E0302 on the  
422 progression of ALS. Because of individual differences in the extent of ALS progression, homogenization of  
423 subject characteristics is required to evaluate the efficacy of the drug adequately. For this reason, a 12-week  
424 observation period was set prior to the initiation of drug administration to investigate the subject's clinical  
425 symptoms and the extent of progression.  
426

#### 427 3) Measures to ensure blinding

428 The investigational drug product E0302 is characterized by a red color attributable to the drug substance.  
429 In addition, it is expected that the urine of subjects treated with E0302 will be red. Therefore, as a measure  
430 to ensure the blinding of the study and reduce assessor bias, efficacy assessors, ALSFRS-R assessors, safety  
431 assessors, and investigational drug administrators at participating medical organizations are assigned to  
432 different personnel (see 8.3.4 "Blinding of Investigational drug and Urine Color").  
433

434 The system required for conducting the study at the participating medical organizations

- |                                                        |                |
|--------------------------------------------------------|----------------|
| 435 (1) Efficacy evaluator                             | (at least one) |
| 436 (2) ALSFRS-R assessors                             | (at least one) |
| 437 (3) Safety assessor                                | (at least one) |
| 438 (4) Subjects receiving the investigational product | (at least one) |
- 439

### 440 **3.4. Sample Size and Study Period**

441 The target number of subjects: 128 (64 in the placebo group and 64 in the E0302 - 50 mg group)

442 Study period: October 2017 to March 2022 (planned)

443 (If no significant difference is found in the primary endpoint, the study will be terminated at that time.)

444 Case registration period: October 2017 to October 2019 (planned)

445 Period for each subject: From the date of informed consent obtainment to Week 16 of the Treatment

446 period (subjects wishing to continue treatment beyond Week 16 move to the Continuous treatment  
447 period (until March 2022) after obtaining informed consent.

448

449 [Rationale]

450 The rationale for sample size selection is described in section 18.1, "Determination of sample size."

451

452

## 453 **4. SELECTION OF STUDY POPULATION**

### 454 **4.1. Diagnostic criteria**

455 Patients with isolated or familial ALS who meet the definite, probable, or probable laboratory-supported  
456 criteria listed in the updated Awaji Criteria<sup>13</sup> (Table 4-1) are eligible for this study. Signs of upper and  
457 lower motor neuron damage<sup>14</sup> are shown in Table 4-2. Diagnostic criteria for needle electromyography  
458 used in the updated Awaji criteria<sup>15</sup> are shown in Table 4-3.

459

460

**TABLE 4-1 Updated Awaji Criteria**

|                                                                                                                                                                                                                                             |
|---------------------------------------------------------------------------------------------------------------------------------------------------------------------------------------------------------------------------------------------|
| Diagnostic grade                                                                                                                                                                                                                            |
| <b>Definite</b>                                                                                                                                                                                                                             |
| ○Clinical or neurophysiological evidence of upper and lower motor neuron dysfunction in the bulbar region and at least two spinal regions, or three spinal regions                                                                          |
| <b>Probable</b>                                                                                                                                                                                                                             |
| ○Clinical or neurophysiological evidence of upper and lower motor neuron dysfunction in at least two regions with some upper motor neuron signs necessarily rostral (above) to lower motor neuron dysfunction                               |
| <b>Probable laboratory-supported</b>                                                                                                                                                                                                        |
| ○Clinical signs of upper and lower motor neuron dysfunction in one region together with neurophysiological evidence of lower motor neuron dysfunction in 2 regions                                                                          |
| <b>Possible</b>                                                                                                                                                                                                                             |
| ○Clinical or neurophysiological evidence of upper and lower motor neuron dysfunction in one region, or Upper motor neuron signs evident in 2 regions, or lower motor neuron dysfunction evident rostral (above) to upper motor neuron signs |

461

462

463

464

465

466

467

468

469

470

471

472



473

**Table 4-2 Signs of upper and lower motor neuron damage**

|                                             | Brainstem                                                                                                                                          | Cervical                                                                                          | Thoracic                                                              | Lumbosacral                                                                                                  |
|---------------------------------------------|----------------------------------------------------------------------------------------------------------------------------------------------------|---------------------------------------------------------------------------------------------------|-----------------------------------------------------------------------|--------------------------------------------------------------------------------------------------------------|
| <b>Lower motor neuron sign</b>              |                                                                                                                                                    |                                                                                                   |                                                                       |                                                                                                              |
| weakness, atrophy, fasciculations           | jaw, face, palate, tongue, larynx                                                                                                                  | neck, arm, hand, diaphragm                                                                        | back abdomen                                                          | back, abdomen, leg, foot                                                                                     |
| <b>Superior neuronal sign</b>               |                                                                                                                                                    |                                                                                                   |                                                                       |                                                                                                              |
| pathologic spread of reflexes, clonus, etc. | clonic jaw jerk, gag reflex, exaggerated snout reflex, pseudobulbar features, forced yawning, pathologic deep tendon reflexes (DTRs), spastic tone | clonic DTRs, Hoffmann reflex, pathologic DTRs, spastic tone, preserved reflex in weak wasted limb | loss of superficial abdominal reflexes, pathologic DTRs, spastic tone | clonic DTRs, estensor plantar response, pathologic DTRs, spastic tone, preserved reflex in weak, wasted limb |

474 BR Brooks et al. El Escorial revisited: revised criteria for the diagnosis of amyotrophic lateral sclerosis.  
 475 Amyotroph Lateral Scler Other Motor Neuron Disord. 2000 Dec;1(5):293-299.

476

477

478 **TABLE 4-Diagnostic Criteria for Needle Electromyography Used for Three Updated Awaji Criteria**

479 (If A and B are satisfied, each muscle fulfills the criteria, and if the required number of muscles is satisfied,  
 480 the criteria for each nerve site are fulfilled.)

| Chronic neurogenic changes (A)                                                                                                    | Active neurogenic changes (B)                                                                                        |
|-----------------------------------------------------------------------------------------------------------------------------------|----------------------------------------------------------------------------------------------------------------------|
| Increased amplitudes, prolonged duration, and the appearance of multiphasic waves of motor unit potentials (motor unit potential) | Positive sharp wave (sharp positive wave)                                                                            |
| Delayed MUP recruitment                                                                                                           | Fibrillation potential (Fiber Power Generation)                                                                      |
| The unstable and complex waveform of MUP                                                                                          | Fasciculation potential (fascicular self-generation) (Note: Only in the same muscle with chronic neurogenic changes) |

481

|                         | Number of muscles needed to meet electrophysiological criteria |
|-------------------------|----------------------------------------------------------------|
| Cranial nerves          | One muscle                                                     |
| Cervical spinal cord    | Two muscles                                                    |
| Thoracic spinal cord    | One muscle                                                     |
| Lumbosacral spinal cord | Two muscles                                                    |

482 De Carvalho M, et al. Electrodiagnostic criteria for diagnosis of ALS. Clin Neurophysiol. Excerpt from  
 483 2008;119:497-503.

484

485

486 The El Escorial revised Airlie House diagnostic criteria are shown below.<sup>16, 17</sup>

487 (1) Clinically reliable ALS (clinically definite ALS) is defined as clinical or neurophysiological evidence of  
 488 upper and lower motor neuron dysfunction in the bulbar region and at least two spinal regions or three  
 489 spinal regions.

490 (2) Clinically probable ALS (clinically probable ALS) is defined as clinical or neurophysiological evidence  
 491 of upper and lower motor neuron dysfunction in at least two regions with some upper motor neuron signs

- 492 necessarily rostral (above) to lower motor neuron dysfunction.
- 493 (3) Clinically probable and laboratory evidence of ALS (clinically probable-laboratory-supported ALS) is  
494 defined as clinical signs of upper and lower motor neuron dysfunction in one region together with  
495 neurophysiological evidence of lower motor neuron dysfunction (Positive sharp wave, Fibrillation  
496 potential) in 2 regions.
- 497 (4) Clinically possible ALS (clinically possible ALS) is defined as clinical or neurophysiological evidence  
498 of upper and lower motor neuron dysfunction in one region, or Upper motor neuron signs evident in 2  
499 regions, or lower motor neuron dysfunction evident rostral (above) to upper motor neuron signs.
- 500 (5) Clinically suspected ALS (clinically suspected ALS) presents with pure lower motor neuron involvement  
501 and is not suitable as a group for the purpose of the clinical study of ALS. Therefore, it is excluded from  
502 the global neurology association El Escorial revised ALS diagnostic criteria.  
503  
504

**4.2. Severity Criteria for ALS**

The severity of ALS is assessed on the basis of ALS severity criteria 2) shown in Table 4-4. In this clinical trial, patients who require assistance, orthoses, or assistive devices but whose daily life and work are judged to be self-sufficient will be included in severity 2.

**Table 4-Criteria for Severity of 4 ALS (Ministry of Health and Welfare, Research Group on Neurodegenerative Diseases, 1998)**

| Severity       | Criteria                                                                                                                                                                                                                                                                                                |
|----------------|---------------------------------------------------------------------------------------------------------------------------------------------------------------------------------------------------------------------------------------------------------------------------------------------------------|
| First degree   | Dysarthria due to movement of one limb or bulbar palsy but does not interfere with daily life or employment                                                                                                                                                                                             |
| Second degree* | Among the six muscles of each body and extremity (4), muscle of the trunk (1), tongue, face, palate, and pharynx (1), there are obvious motor disorders in one or two parts of the body and extremities, and thus there is a living disability. However, it is possible to live and work independently. |
| Third-degree   | Since the muscle force lowering of three or more parts in the above six positions cannot continue the social life such as housework and employment, and assistance is needed for daily life.                                                                                                            |
| Fourth degree  | Inability to breathe, swallow, or maintain a sitting position, necessitating assistance in all aspects of daily life                                                                                                                                                                                    |
| Fifth degree   | Bedridden and require full life support                                                                                                                                                                                                                                                                 |

※: This study will include patients who require assistance, orthoses, or assistive devices but whose daily life and employment are judged to be almost independent and possible.

**4.3. Eligibility Criteria**

Patients who meet the following inclusion criteria (1)-(4), (6) and (7) at the initiation of the observation period, and (3) and (5)-(7) at the completion of the observation period, and do not meet any of the exclusion criteria (1)-(14) at the initiation of the observation period, and (1)-(4), (7)-(11), (13)-(14) at the completion of the observation period are eligible.

**4.3.1. Inclusion Criteria**

Patients who meet all the following criteria will be included:

- (1) Patients who have provided written informed consent to participate in the study.
- (2) Patients aged  $\geq 20$  years at the time of obtainment of informed consent.
- (3) Patients diagnosed with isolated or familial ALS who meet the definite, the probable, or the probable laboratory-supported of the updated Awaji criteria.
- (4) Patients within one year of onset at the initiation of the observation period.
- (5) Patients with a 1-2-point decrease in the ALSFRS-R total score during the observation period (12 weeks).
- (6) Patients with severity 1 or 2 according to the severity criteria of ALS.
- (7) Ambulatory patients.

[Rationale for setting the inclusion criteria]

- (1) It was established on the basis of Good Clinical Practice (GCP).
- (2) In consideration of obtaining written informed consent from the patient, the patient was considered to be  $\geq 20$  years of age.
- (3) Updated Awaji criteria with increased diagnostic sensitivity were used in this study to include patients with early-stage disease.
- (4) It was set to enroll the patients in the early stages of the disease.
- (5) It was set in order to confirm the degree of the progress of the disease state.

541 (6) (7) It was set for the patients whose daily life and employment were judged to be almost  
542 independent.  
543

544 **4.3.2. Exclusion Criteria**

545 Patients who meet any one of the following criteria will be excluded.

- 546 (1) Patients undergoing tracheostomy
- 547 (2) Patients with a history of non-invasive respiratory support
- 548 (3) Patients with %FVC  $\leq$  60%
- 549 (4) Patients with chronic obstructive pulmonary disease (COPD)
- 550 (5) Patients with neurologic symptoms due to vitamin B12 deficiency
- 551 (6) Patients who have received edaravone within four weeks prior to enrollment in the observation  
552 period
- 553 (7) Patients receiving riluzole or have changed or discontinued the dosage after obtaining informed  
554 consent
- 555 (8) Patients with cognitive impairment
- 556 (9) Pregnant women or patients who may possibly be pregnant
- 557 (10) Patients with serious respiratory, cardiovascular, or hepatorenal disease
- 558 (11) Patients with malignancies
- 559 (12) Patients who participated in another clinical trial within 12 weeks prior to the acquisition of  
560 consent
- 561 (13) Patients with a history or concomitant history of drug allergy or severe allergic disease  
562 (anaphylactic shock, etc.)
- 563 (14) Patients for whom the principal investigator or the sub-investigator judges their participation in  
564 the study to be inappropriate.  
565

566 [Rationale for setting the exclusion criteria]

- 567 (1)–(4) To exclude patients with decreased respiratory function.
- 568 (5) It was set in order to exclude those with sub-acute combined myelodegeneration.
- 569 (6) This drug has been designated as a disallowed concomitant drug and included because it is  
570 expected to affect the evaluation of the efficacy of the investigational product.
- 571 (7) Limited concomitant medication – riluzole – is included because it is expected to affect the  
572 efficacy evaluation in this study.
- 573 (8) To appropriately evaluate the efficacy and safety.
- 574 (9)–(14) It was set considering patient safety.  
575  
576  
577  
578  
579  
580  
581  
582  
583  
584  
585  
586  
587  
588  
589  
590  
591

## 5. TREATMENT

### 5.1. Identity of Investigational Product

#### 5.1.1. Chemical Name and Structural Formula of E0302

Investigational drug code: E0302

Generic name: mecobalamin

Chemical Formula: Co-[-(5, 6-Dimethylbenz-1 H-imidazolyl)]-Co-methylcobamide

Molecular formula: C 63 H#2] CoN 13 O 14 P

Molecular weight: 1344.38

Structural formula: mecobalamin

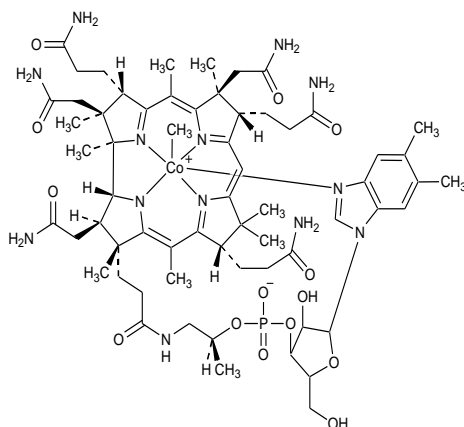

#### 5.1.2. Comparator Drug

Placebo: White lyophilized mass or powder without mecobalamin

#### 5.1.3. Drug Preparation

The E0302 content, color, and dosage form of each drug product are shown in Table 5-1.

Table 5-1 E0320 Content, Color, Dosage Form of Preparations

| Investigational drug    | Content, color, dosage form                                                           |
|-------------------------|---------------------------------------------------------------------------------------|
| E0302 - 25 mg injection | Red lyophilized mass or powder containing mecobalamin 25 mg in one vial for injection |
| E0302 Placebo injection | White lyophilized masses or powders without mecobalamin for injection                 |

Storage Conditions: Light-resistant at room temperature.

## 5.2. Investigational Drug Labeling and Packaging

### 5.2.1. Packaging

<Investigational product for Treatment period>

E0302- 25 mg injection and E0302 Placebo injection are packaged in the vial of the investigational drug, and the indistinguishability of E0302 - 25 mg injection and E0302 Placebo injection is guaranteed by the appearance. Two vials for one dose are packaged in a small box (one package unit), and 32 small boxes are packaged in a large box (supply for 16 weeks of treatment). A small box containing two vials for a single dose contains one of the following combinations of the investigational product:

- E0302 - 50 mg group: E0302 - 25 mg injection 2 vials

- 625 • Placebo group: E0302 - Placebo injection 2 vials

626

627

<Investigational product used in the Continuous treatment period>

628

E0302 - 25 mg injection shrinks the investigational drug vial. Two vials for one dose are packaged in a small box (one package unit), and 32 small boxes are packaged in a large box (16 weeks' supply). The following combinations of investigational products are packaged in small boxes containing two vials for one dose:

629

630

631

632

633

- E0302 - 50 mg group: E0302 - 25 mg injection 2 vials

634

635

### 5.2.2. Investigational Drug Labeling

636

Labels for vials, small boxes, and large boxes contain the following information:

637

638

<Sample labeling of investigational products for Treatment period>

639

640

Study <Treatment period>

641

Identification No.

642

Storage

643

Lot number

644

Name, title, and address of the sponsor-investigator

645

Protocol No.

646

Drug Number (label only for vial not shown)

647

Expiration date

648

649

650

651

652

<Sample label of the investigational product for Continuous treatment period>

653

654

For Clinical Trial <Continuation Period>

655

Identification No.

656

Storage

657

Lot number

658

Name, title, and address of the sponsor-investigator

659

Protocol No.

660

Expiration date

661

662

663

664

### 5.3. Storage of Investigational Drug

665

The Supervisor of the Investigational Drug shall appropriately manage the investigational drug in accordance with the "Procedures for Management of the E0302 Investigational Drug" and prepare the Investigational Drug Accountability Record to understand the status of use of the investigational drug and the progress of the study. The investigational product should be stored in a light-resistant container at room temperature.

666

667

668

669

670

671

### 5.4. Delivery of Investigational Drug to Study Institution

672

The coordinating investigator (representative, hereinafter the same) will supply the investigational product to the Supervisor of the Investigational Drug. At that time, the Supervisor of the Investigational Drug (or its representative) receives the Investigational Drug Delivery Form and, after confirming the quantity, etc. of the investigational drug, enters the date of receipt, name of the participating medical

673

674

675

676 organization, and affiliation on the Investigational Drug Receipt Form, and signs and seals or signs.

677 The Supervisor of the Investigational Drug shall record the status of receipt and export of the  
678 investigational drug, the status of use of the investigational drug for each subject, and the recall or  
679 disposition of unused investigational drugs in the Investigational Drug Accountability Record. Refer to  
680 the "Procedural Manual for the Control of E0302 Investigational Products" for details of records related  
681 to the management of the investigational product.

682

## 683 **5.5. Administration of Investigational Drug**

### 684 **5.5.1. Dose and Administration Method**

685 E0302 - 50 mg or placebo will be administered intramuscularly twice weekly from the initial day of  
686 administration until Week 16 of the Treatment period.

687 For subjects who wish to enter the Continuous treatment period after the completion of the Treatment  
688 period, E0302 - 50 mg will be administered intramuscularly twice weekly from the initial day of the  
689 Continuous treatment period until March 2022.

690

691 [Justification of dosage]

692 On the basis of the reported results of clinical studies and the results of Phase II/III study, the doses  
693 investigated in this study were E0302 - 50 mg and placebo. The rationale for dose selection is described  
694 below.

695

- 696 • In a clinical study, long-term intramuscular administration of 50 mg twice weekly tended to be  
697 associated with better Kaplan–Meier survival curves ( $P = 0.0858$ , log-rank test).<sup>11</sup>
- 698 • In a subgroup analysis in Phase II/III study involving patients within one year from the onset of  
699 symptoms, dose-response (monotonic and saturating) was observed in the subgroup of patients for  
700 12 months ( $P = 0.010$  and  $P = 0.011$ , respectively; log-rank score versus [-1, 0, 1] and contrast [-2, 1,  
701 1] testing). The hazard ratios (95% confidence intervals) for the placebo group were 0.640 (0.377,  
702 1.085) and 0.498 (0.267, 0.929) for the 25 mg and 50 mg groups, respectively. The time to an event  
703 rate of 50% (95% confidence interval) was 570 (465, 720) days, 1087 (564, -) days, and 1197 (609,  
704 -) days for the placebo, 25 mg, and 50 mg groups, respectively. In addition, there was also a dose-  
705 response (monotonic and saturating) reduction in ALSFRS-R total scores ( $P = 0.003$  and  $P = 0.013$ ,  
706 respectively; contrasts using Wilcoxon scores [-1, 0, 1] and contrasts [-2, 1, 1] tests), and the median  
707 (minimum to maximum) change in ALSFRS-R total score was -26.5 (-40 to -3), 25 mg-26.5 (-40 to  
708 0), and 50 mg-22.0 (-38 to 1) in the placebo group. The results of this study suggested that effects  
709 are particularly expected in the 50 mg group.
- 710 • Due to technical limitations in the design of the formulation, the high-dose formulation that can be  
711 manufactured at this time is 25 mg vials, with the highest concentration currently available being at  
712 12.5 mg per mL. For this reason, two intramuscular injections of 2 mL (i.e., total 4 mL) and three  
713 intramuscular injections of 2 mL (i.e., total 6 mL) are administered for doses of 50 mg and 75 mg,  
714 respectively. In the present study, it is considered difficult to administer >75 mg of the  
715 investigational drug because of the patient's suffering.
- 716 • The washout period was allowed from the last day of administration to 14 days and 28 days in the  
717 Treatment period and Continuous treatment period, respectively, in consideration of the interference  
718 with the subjects' daily activities.

719

### 720 **5.5.2. Method of Preparation and Administration**

721 The investigational drug administrator will administer the investigational drug twice weekly on an  
722 outpatient basis in accordance with the instructions for administration provided by the safety assessor. If  
723 the subject becomes unable to visit the hospital as an outpatient, the investigational product may be  
724 administered by a coordinator, such as a family physician, who has been designated as an investigational  
725 product administrator at the subject's home or nearby medical institution. The investigational product will  
726 be administered twice weekly during the 7-day period, starting from the initial day of administration in

727 the Treatment period and Continuous treatment period. It is not possible to administer two doses (four  
728 vials) during the same day with at least one dosing interval.

729 Two vials will be used per dose for the administration of the investigational product. Immediately prior  
730 to the administration of the investigational product, the administrator will add 2.2 mL of isotonic sodium  
731 chloride solution to each vial to confirm that the contents have completely dissolved and subsequently  
732 administer the 2.0 mL intramuscularly at two locations (i.e., total 4 mL). The drug solution should be used  
733 immediately after reconstitution and protected from light. The following precautions should be taken  
734 when administering the drug intramuscularly:

- 735 • In principle, the application site should be the anterior thigh, lateral thigh, deltoid, or gluteus  
736 maximus (or gluteus medius).
- 737 • As a general rule, repeated administration at the same site should be avoided.
- 738 • The site of application should be avoided.
- 739 • If insertion into the injection site causes severe pain, and if blood flows backward, withdraw the  
740 needle immediately and inject at a different site.

741

742 When administering the investigational product, the investigational drug administrator should provide  
743 information on the day of administration of the investigational product, site of administration, drug  
744 number, name of the investigational drug administrator, blood pressure prior to administration, pulse  
745 rate, and safety in the "In-house E0302 Administration Record Form" or the "External E0302  
746 Administration Record Form."

747 In addition, two vials should be used at the time of one dose administration. If the administration is not  
748 possible due to the subject's condition, details such as the reason for withdrawal will be recorded in the  
749 treatment record. The washout period may be 14 days and 28 days, respectively, from the last dosing day  
750 in the Treatment period and the Continuous treatment period.

751 Subjects who have entered the Continuous treatment period will be allowed to receive the  
752 investigational product at home (self-administration) by subjects trained in the administration of the  
753 investigational product or by their families, in addition to trial collaborators such as their own  
754 physicians designated as study medication administrators. When administering the investigational  
755 product, the subject or his/her family should provide information on the day of administration of the  
756 investigational product, the site of administration, the name of the investigational drug administrator,  
757 blood pressure, pulse rate, and safety prior to administration in the E0302 Self-Administration  
758 Implementation Sheet.

### 759 **5.5.3. Treatment Period**

760 The Treatment period is 16 weeks (4 months). In addition, if the subject wishes, the Extension may be  
761 continued until March 2022 as the Continuous treatment period.

762 Even during the Continuous treatment period, treatment will be discontinued at the time of the event.

763

764 [Rationale for the setting of dosing period]

765 In the analysis of the subgroup of Phase II/III study, the difference in the change in the ALSFRS-R  
766 total score at four weeks (95% confidence interval) was 0.4 (-0.7, 1.5), which was not significantly  
767 different ( $P = 0.258$ ), but the difference in the change in the ALSFRS-R total score at 16 weeks (95%  
768 confidence interval) was 3.3 (0.5, 6.0), which was significant ( $P = 0.017$ ).

769 On the other hand, a decrease in the ALSFRS-R total score at 100 days of observation has been  
770 reported to be helpful in predicting survival.<sup>20</sup> ALSFRS-R assessment at 16 weeks may be predictive of  
771 clinically significant survival.

772 Therefore, it was deemed appropriate to have a 16-week evaluation period, and a shorter 4-week  
773 evaluation period would be difficult. Since this study is a placebo-controlled study in subjects with  
774 ALS, the Treatment period was set at 16 weeks in order to shorten the placebo administration period as  
775 much as possible due to ethical considerations. The extended administration was allowed until March  
776 2022 (Continuous treatment period).

777



778 **5.6. Storage and Prescription of Investigational Drug**

779 **5.6.1. Subjects who can attend the outpatient clinic**

780 In this clinical trial, the investigational product manager will appropriately store and manage the  
781 investigational product according to the " Procedures for Management of the E0302 Investigational  
782 Drug ". The principal investigator will dispense the investigational product to the investigational  
783 product manager. The investigational product manager will dispense the product to the administrator.  
784 Subsequently, he/she will administer the drug to the subject.

785  
786 **5.6.2. Subjects who cannot attend the outpatient clinic**

787 **5.6.2.1. During the Treatment Period**

788 In principle, during the mid-Treatment period, the drug will be administered to subjects in outpatient  
789 clinics. If ambulatory visits become difficult due to reasons such as the progress of the underlying  
790 disease, they will be permitted to be administered by the investigational drug administrator at the  
791 subject's home or nearby medical institution. In addition, refer to the "Procedures for Delegation of  
792 Study Treatment." Storage of the investigational product at the subject's home is permitted. The  
793 following precautions should be taken when storing the investigational product at the subject's home.

- 794 • When investigational products are stored at the subject's home, the maximum number of small  
795 boxes shall be up to 8 per storage.
- 796 • The Supervisor of the Investigational Drug shall place the materials necessary for the  
797 administration of the investigational drug, needles, syringes, etc., in the special control box and  
798 dispense them to the subject or family.
- 799 • The investigational products will be locked at room temperature and under light-resistant  
800 conditions in a special control box at the subject's home.
- 801 • The investigational drug administrator, the subject, or the family should pay attention to the  
802 storage conditions of the investigational product.

803  
804 **5.6.2.2. During the Continuous Treatment Period**

805 In this study, when ambulatory visits are difficult due to the patient's reasons, such as the reason for  
806 progression of the underlying disease during the Continuous treatment period, because of the patient's  
807 health status, etc., administration of the investigational product at the subject's home (self-  
808 administration) may be performed by subjects or their families trained in the administration of the  
809 investigational product in addition to the administration at the subject's home or nearby medical  
810 institutions. In the considerations for storing the investigational products at the subject's house (see  
811 "5.6.2.1. During the Treatment Period"), it is not required to lock if it is self-administered. If the  
812 investigational products are stored at the subject's home, the maximum number of investigational drugs  
813 that can be prescribed is 28.

814 If the effects of the new coronavirus infection force us to take measures that differ from the  
815 provisions of the study protocol and normal procedures, we shall follow the "Procedures for Conducting  
816 a Clinical Trial under the Influence of a New Coronavirus Infection," which is provided separately,  
817 while placing the highest priority on ensuring the safety of subjects. In providing the investigational  
818 drug for administration at the subject's home, the subject may use an investigational drug delivery  
819 company to have the drug delivered directly to his/her home. With regard to the delivery of the  
820 investigational drug to the subject's home, the investigational drug shall be delivered to the subject  
821 without fail in accordance with the "Procedures for Transporting Investigational Drugs to the Subject's  
822 Home" separately specified, with due attention to personal information management.

823  
824 Translated with [www.DeepL.com/Translator](http://www.DeepL.com/Translator) (free version)

825 **5.7. Retrieval of Investigational drugs**

826 After completion of the study, the Supervisor of the Investigational Drug shall promptly return the  
827 investigational drug (small boxes containing unused and used vials) from the participating medical  
828 organization to the coordinating investigator.

829

830 **5.7.1. Retrieval of Unused and Used Investigational drugs during the Treatment Period**

831 1) Unused

832 • The person who receives the investigational product shall return the unused investigational  
833 product to the Supervisor of the Investigational Drug.

834 2) Used

835 • The investigational drug administrator shall return a small box containing used vials to the  
836 investigational drug manager.

837

838 **5.7.2. Retrieval of Unused and Used Investigational drugs during the Continuous Treatment**  
839 **Period**

840 1) Unused

841 • The person who receives the investigational product shall return the unused investigational  
842 product to the Supervisor of the Investigational Drug.

843 • When self-administering, the subject or family shall place unused investigational products in a  
844 special control box and return them to the Supervisor of the Investigational Drug.

845 2) Used

846 • The investigational drug administrator shall return a small box containing used vials to the  
847 Supervisor of the Investigational Drug.

848 • In the case of self-administration, the subject or family shall return a small box containing used  
849 vials to the Supervisor of the Investigational Drug in the Special Management Box.

850

851

852 **6. PRIOR AND CONCOMITANT THERAPY**

853 **6.1. Prior Treatment**

854 Except for patients receiving edaravone as prior therapy within four weeks prior to enrollment in the  
855 observation period (see "4.3.2. Exclusion Criteria"), no pretreatment provisions will be established.

856 **6.2. Concomitant Therapy**

857 **6.2.1. Prohibited Concomitant Drugs and Therapy**

858 The following drugs will be prohibited from the initiation of the observation period to Week 16 of the  
859 Treatment period or at the time of discontinuation, whichever comes first.

860 1) Drugs with Possible Efficacy in ALS (Appendix 2)

861 2) Drugs whose main ingredient is vitamin B12 (excluding topical agents) (Appendix 2)

862 3) Other investigational products, investigational products such as regenerative medicine, and  
863 investigational devices

864

865 [Rationale]

866 1) (2) Since this product may affect the evaluation of the efficacy of the investigational product, it  
867 was set.

868 3) Considerations for the safety of subjects were included.

869

870 The following therapies are prohibited from the initiation of the observation period to Week 16 of the  
871 Treatment period or at the time of discontinuation, whichever comes first.

872 4) HAL medical leg type (Appendix 2)

873

874 **6.2.2. Restricted Concomitant Drug**

875 Subjects taking riluzole at the initiation of the observation period will be allowed to take further  
876 doses. However, the daily dose of riluzole should not be changed or administered at the initiation of the  
877 observation period until Week 16 of treatment or at the time of discontinuation, whichever comes first.  
878 Dosage reduction or discontinuation is permitted if an adverse event attributable to riluzole occurs or if

879 the daily dose of riluzole must be changed due to increased dysphagia, etc. Dose escalation or re-  
880 administration is not allowed after dose reduction or discontinuation.

881

882 [Rationale]

883 ALS is a fatal disease. In view of the ethical aspects of the subjects, concomitant use of riluzole was  
884 allowed. However, because the administration of riluzole is expected to affect the evaluation of the  
885 efficacy of the study, a restriction was set regarding the daily dose of riluzole coadministration.

886

### 887 **6.2.3. Concomitant Therapy**

#### 888 1) Rehabilitation

889 Rehabilitation can be performed during all periods of the Observation, Treatment, and Continuous  
890 treatment periods. Active rehabilitation should be provided according to the subject's condition,  
891 including exercise and respiratory training to restore muscle strength (see 10.7 Concomitant  
892 Medications and Concomitant Therapies). However, the HAL medical leg type is prohibited from the  
893 initiation of the observation period to week 16 of the Treatment period or at the time of discontinuation,  
894 whichever comes first.

895

#### 896 2) Nutritional management

897 Even if nutritional support measures (e.g., nasogastric tube feeding, IVH, or PEG) are administered  
898 during all periods of the Observation, Treatment, and Continuous treatment periods, a continuation of  
899 the study is allowed (see 10.7 Concomitant Medications/Therapies).

900

901

## 902 **7. INFORMED CONSENT**

### 903 **7.1. Preparation of Written Consent Form**

904 The principal investigator will prepare an explanatory document and an informed consent form  
905 (form). In addition, the prepared information and informed consent forms (forms) will be submitted to  
906 the Institutional Review Board prior to the initiation of the clinical trial for approval.

907 At a minimum, the explanatory documents should include the necessary information in accordance  
908 with the Good Clinical Practice Ordinance (hereinafter referred to as the GCP Ordinance) and related  
909 notifications, etc., with reference to the Guidance on Good Clinical Practice.

910

### 911 **7.2. Obtaining Written Informed Consent**

#### 912 1) Timing and Methods of Initial Informed Consent

913 Prior to a patient's participation in the study, the investigator or sub-investigator will fully explain  
914 the patient's participation in the study using written information and obtain his or her written consent  
915 to participate in the study of his or her own free will. When obtaining written informed consent, the  
916 patient fully understands the content of the written information, enters the date on the informed consent  
917 form, and signs and seals. The investigator, sub-investigator, or study collaborator who provided the  
918 explanation will date and sign or seal the explanation. In addition, the principal investigator, etc.,  
919 supplies a copy of the signed and sealed consent form to the subject together with the explanatory  
920 documents and stores the original consent form with the medical records at the relevant participating  
921 medical organization.

922 If the subject has sufficient capacity to provide informed consent, but it is difficult to sign and seal  
923 or sign due to progression of the underlying disease, etc., the investigator or sub-investigator may  
924 confirm that the subject has agreed to participate in the study and obtain the subject's signed and sealed  
925 or signed written informed consent from the witness. In this case, the relationship between the witness  
926 and the subject, as well as a record of the consent, should also be stored.

927 A witness is a person who is independent of the conduct of the clinical trial, who is unfairly  
928 unaffected by persons involved in the clinical trial, and who attends the informed consent process  
929 when the subject is unable to read the consent form, etc.

- 930 2) Withdrawal of consent  
931 When a subject participating in this clinical trial requests withdrawal of consent, the principal  
932 investigator, etc., should withdraw consent accordingly and record this fact in the medical record.
- 933 3) Revision of explanatory documents and informed consent forms (forms) and obtaining re-consent  
934 If the information that may affect the subject's decision is obtained after the commencement of  
935 the clinical trial and it is deemed necessary to revise the informed consent form, the investigator or  
936 sub-investigator will immediately inform the subject of such information, confirm the subject's  
937 willingness to continue participation in the clinical trial, and record the information in the medical  
938 record. On the basis of this information, the principal investigator shall revise the explanatory  
939 documents and informed consent form and submit the revised explanatory documents and informed  
940 consent form to the Institutional Review Board. After obtaining the approval of the Institutional  
941 Review Board, the principal investigator, etc., explains it to the subject and obtains written  
942 re-consent.
- 943 4) Obtaining consent for the transition to the Continuous treatment period  
944 If the subject wishes to continue treatment, written informed consent will be obtained from the  
945 subject or from the witness between Week 12 of treatment and the initiation of the Continuous  
946 treatment period.
- 947 5) Informed consent obtained from a nearby medical institution in which the patient receives the  
948 investigational product  
949 If it becomes difficult to attend the hospital as an outpatient, the investigational product  
950 administrator may administer the drug at a nearby medical institution. In such cases, written informed  
951 consent will be obtained from the subject on the basis of the "Procedures for Delegation of Study  
952 Treatment." Consent for self-administration at the subject's home will be obtained by the subject or  
953 family.
- 954 6) On the subject's health status, such as the reason for progression of the primary disease during the  
955 treatment or continuation period  
956 For subjects who wish to self-administer the investigational product during the Continuous  
957 treatment period, on the basis of the "Procedures for self-administering the investigational product,"  
958 written informed consent is obtained from the subject or from the family.  
959

## 960 **8. ASSIGNMENT OF DRUGS, SUBJECT REGISTRATION, BLINDING**

### 961 **8.1. Randomization of Investigational drug**

962 The investigational product assignment manager will confirm the indistinguishability of the  
963 packaging appearance of the investigational product (small box [2 vials] and large box [64 vials]) and  
964 subsequently randomly assign the investigational product to the E0302 - 50 mg group and the placebo  
965 group on the basis of the investigational product assignment code (key code) prepared by him/her. At  
966 this time, the allocation Supervisor of the Investigational Drug will randomly withdraw the  
967 investigational drug for storage from each group.  
968  
969

### 970 **8.2. Method of Assigning Subjects to Treatment Group**

#### 971 **8.2.1. Procedures for Subject Registration and Investigational drug Assignment**

972 The investigator or sub-investigator will enroll subjects according to the following procedures:

- 973 1) The investigator or sub-investigator will assign a subject identification code to subjects who have  
974 provided written consent to participate in the study and record it in the E0302 Subject Screening List  
975 and Registry.
- 976 2) On the basis of the investigation items at the initiation of the observation period (see 9.2.1.1, Week 0  
977 (at the initiation of the observation period)), the principal investigator or sub-investigator will  
978 confirm the eligibility of the subjects and enter the necessary items on the case registration system  
979 on the web to determine eligibility. The results of the eligibility evaluation for the observation

- 980 registration will be obtained from the case registration system, and eligible patients will be eligible  
981 for the observation period. Patients who are ineligible will be ineligible for the observation period.
- 982 3) The investigator or sub-investigator will review subject eligibility on the basis of the investigation  
983 items at the completion of the observation period (see 9.2.1.2, Week 12 (at the completion of the  
984 observation period)) after the completion of the 12-week observation period (initial day of the  
985 observation period is Day 0 and Day 84), subsequently enter the necessary items in the case  
986 registration system on the web to determine eligibility. Patients eligible for treatment enrollment will  
987 be eligible for treatment if indicated by the case registration system. Treatment eligibility will be  
988 determined by dynamic allocation (see 8.2.2 Assignment Procedures) and numbered. Patients who  
989 are ineligible will be ineligible for treatment.
- 990 4) On the basis of the evaluation results obtained from the case registration system, the investigator or  
991 sub-investigator will initiate treatment on Day 0 and by Day 3.
- 992 5) The investigator or sub-investigator will promptly enter the required information in the case  
993 registration system on the website after confirming the discontinuation and completion of treatment  
994 for withdrawals, treatment discontinuations, and patients who have completed the Treatment period,  
995 respectively.
- 996

997 Patients with no disease progression during the observation period (patients with no change in the  
998 total ALSFRS-R score during the observation period or patients with a change in the total ALSFRS-R  
999 score of  $\geq -3$ ) will not be eligible for the observation period. However, if the subject wishes to participate  
1000 in the study again, he/she will be permitted to participate again only once after obtaining consent in  
1001 writing. The procedure shall be repeated from 1) in this section.

1002

### 1003 **8.2.2. Method of Assignment**

1004 Randomization is by a central registration method, and in order to avoid selection bias in the  
1005 participating medical organization, the allocation is carried out by a variant of the minimization method,  
1006 which is a dynamic allocation method. In order of subject enrollment, the investigational product will be  
1007 assigned as an allocation adjustment factor (minimization factor), taking into account the balance and  
1008 overall balance between treatment groups within the study site, disease type (bulbar, upper limb, and  
1009 lower limb onset types), severity at the completion of the observation period of ALS (1, 2 degrees), time  
1010 from the initial onset to the initiation of the observation period ( $\leq 9$  months,  $\geq 12$  months), %FVC at the  
1011 completion of the observation period ( $\leq 90\%$ ,  $\geq 90\%$ ), and history of edaravone administration (presence  
1012 or absence, presence) as the allocation adjustment factor (minimization factor).

1013

### 1014 **8.2.3. Confirmation of Assignment Status**

1015 The Medical Statistical Advisor receives reports from the registration center on the status of assignment  
1016 (subject characteristics by treatment group) masked by the treatment group name as appropriate and, if  
1017 there is an imbalance in the allocation adjustment factor (minimization factor), recommends a change in  
1018 the method of assignment to the coordinating investigator and the registration center along with the  
1019 response measures.

1020 The procedures for enrolling subjects are shown in Figure 8-1.

1021

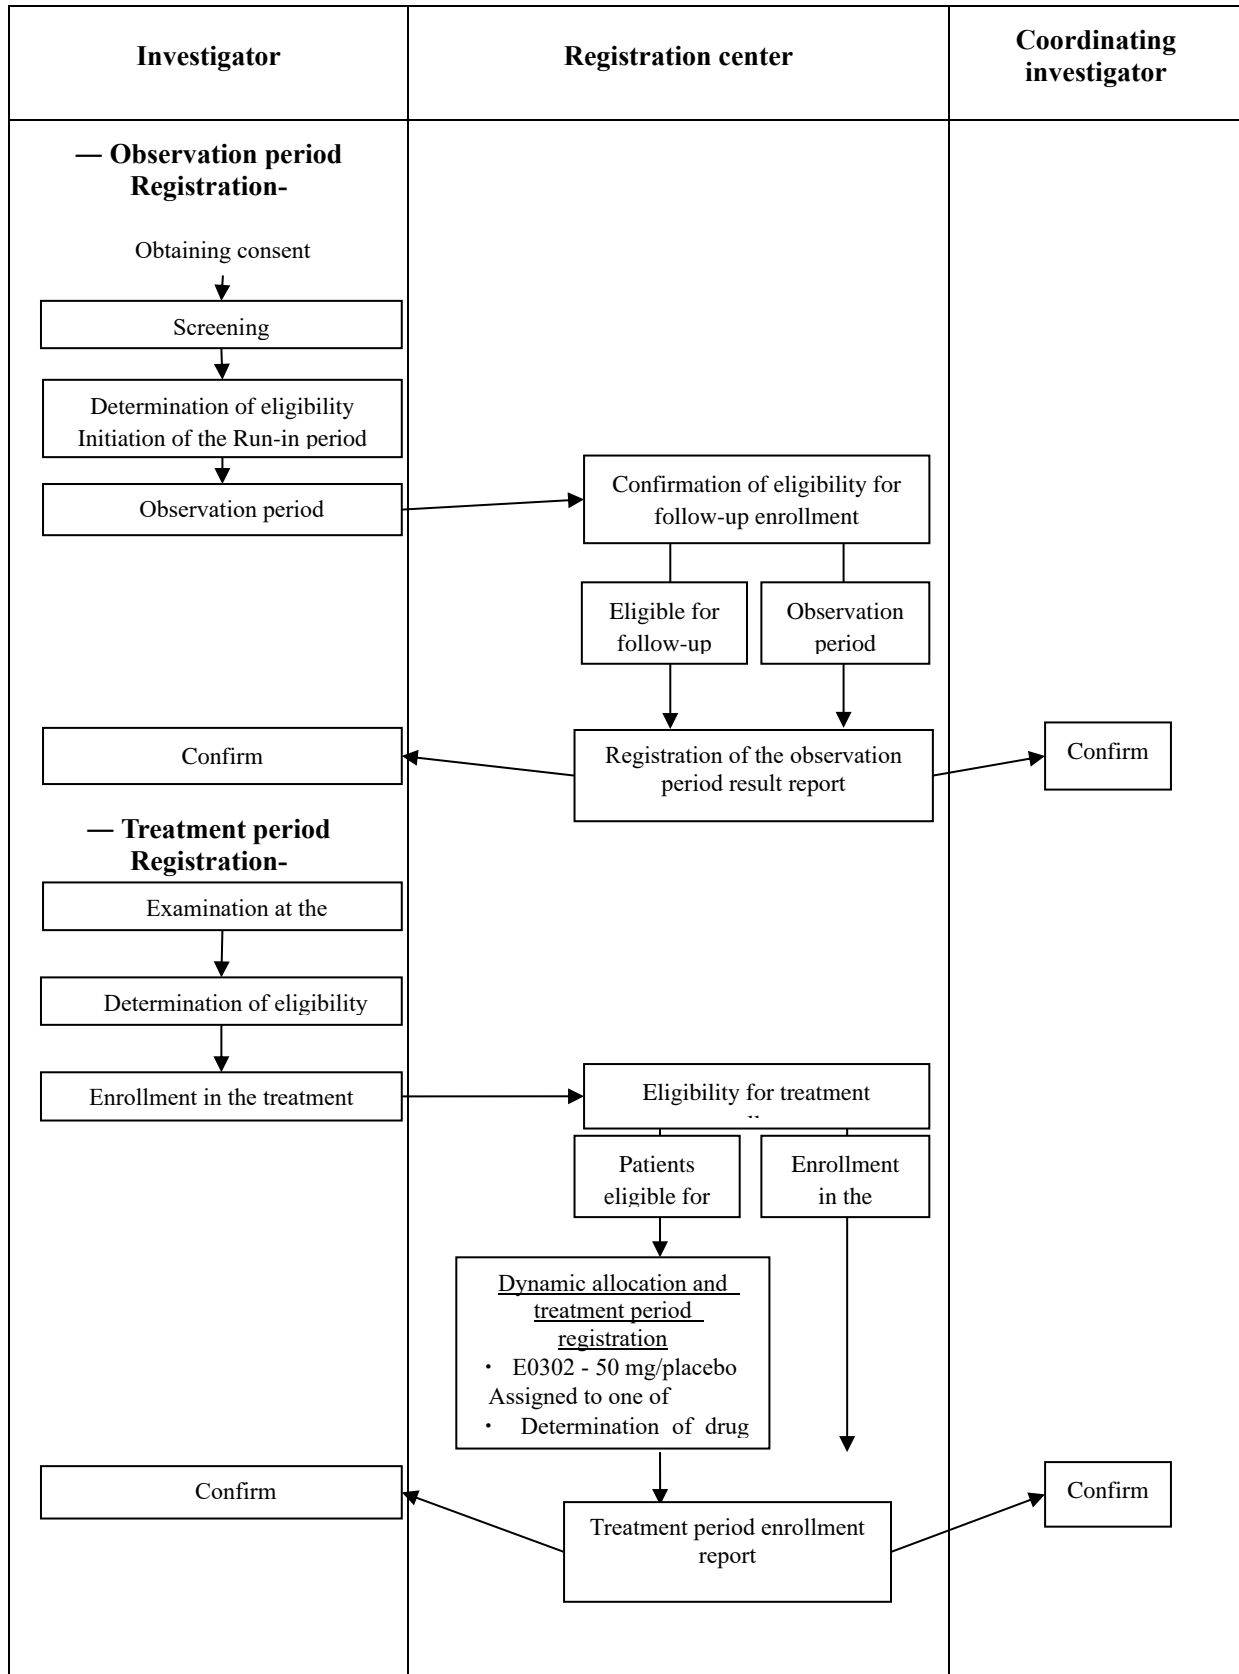

1022

## Figure 81 Subject Enrollment Procedures1

### 1023 **8.3. Blinding**

#### 1024 **8.3.1. Confirmation of Indistinguishability**

1025 The allocation Supervisor of the Investigational Drug confirms the indistinguishability of the  
1026 packaging appearance at the time of allocation of the investigational drug and as early as possible from  
1027 the completion of recall of the investigational drug to expiration of the expiration date for each lot.

1028

#### 1029 **8.3.2. Key Code and Emergency Key Code**

1030 The allocation Supervisor of the Investigational Drug immediately seals the key code after  
1031 randomization of the administration group and stores it until disclosure. In addition, after randomization  
1032 of the administration groups, the investigational product assignment manager seals the emergency key  
1033 codes prepared to ensure the safety of subjects and stores them until disclosure. At the time of  
1034 unblinding, the allocation Supervisor of the Investigational Drug ensures that any emergency key codes,  
1035 other than those unlocked to ensure subject safety, are unopened. The emergency key code other than  
1036 that unblinded for ensuring the safety of the subject is not unblinded (refer to "12.6 Breaking of the  
1037 Emergency Key Code" for the procedures for disclosing the emergency key code).

1038

#### 1039 **8.3.3. Confirmation of Seal Status after Retrieval of Investigational drugs**

1040 The Supervisor of the Investigational Drug shall confirm that unused investigational drugs are  
1041 sealed, the seal used investigational drugs, and return them to the coordinating investigator.

1042

#### 1043 **8.3.4. Securing Blindness of the Investigational drug and Urine Color**

- 1044 • In principle, the clinical trial will be conducted at participating medical organizations through a  
1045 system that includes at least one efficacy assessor, ALSFRS-R assessor, safety assessor, and  
1046 investigational drug administrator (see 10.1 "Evaluator and Investigational drug Administrator").
- 1047 • The efficacy assessor, ALSFRS-R assessor, safety assessor, and investigational drug administrator  
1048 will not ask the subject regarding the color of the urine. If information regarding the color of urine  
1049 is obtained, this information shall not be shared with other persons involved in the clinical trial.
- 1050 • The investigational drug administrator should prepare and administer the investigational product in  
1051 accordance with the "Procedures for Administration of E0302 Investigational Product" to ensure  
1052 that the color of the investigational product is not visible to the subject and his/her family.  
1053 Information regarding the color of the investigational product should not be shared with other  
1054 persons involved in the clinical trial.
- 1055 • The investigational drug administrator shall not share information regarding the color of the  
1056 investigational product with other persons involved in the clinical trial.

1057

### 1058 **8.4. Opening of Emergency Key Code**

1059 After locking the database up to Week 16 of treatment for all subjects, the coordinating investigator  
1060 requests the investigational product assignment manager to break the code.

1061





\*1 Should be conducted from Day 0 (Allocation date) to Day3. \*2 Obtained informed consent from Week 12 to Week 16. \*3 Occurrence of the Event and Adverse event are required to be reported from the last administration date to 28 days later. \*4 Conducted in the eligible patients for the treatment period. \*5 Measurement of serum Vitamin B12 level are conducted. \*6 Women only take a pregnancy test. \*7 Conducted before administration of the investigational product. \*8 QT assessments are conducted before administration of the investigational product if the first administration is on the allocation date. \*9 QT assessments are conducted twice (before administration and 2 hours later after administration). \*10 Conducted from Week 8 to the last administration date of Week 15. \*11 The results of electromyography and nerve conduction studies conducted in the other medical institutions allowed to be evaluated. \*12 Among the patients enrolled in the treatment phase, ALSFRS-R evaluation and investigation of concomitant medication and concomitant therapy will be conducted as much as possible until Week 16 of the treatment phase for the discontinued patients except for the untreated patients (except for those who refuse to continue participation in the study or withdraw consent). \*13 For twice-weekly administration of the study drug, the drug will be administered twice during a 7-day period starting from the start date of the treatment/continuation period. The interval between doses should be at least one day, and two doses (4 vials) on the same day is not allowed. \*14 Performed after last administration of the investigational drug and within  $\pm 2$  weeks from the discontinuation date.

## 9.2. Investigation/Evaluation Items and Procedures in the Three Period

The study consists of three periods: the Observation period, the Treatment period, and the Continuous treatment period.

### 9.2.1. Observation Period

The observation period is defined as 12 weeks from the observation period Week 0 (at the initiation of the observation period) to the observation period Week 12 (at the completion of the observation period).

#### 9.2.1.1. Observation period Week 0 (Initiation of the observation period)

For subjects for whom written consent to participate in the study is obtained, tests and observations necessary to determine eligibility will be performed. The investigator or sub-investigator will perform examinations and observations required for qualification at the initiation of the observation period.

At Week 0 of the observation period, the following examinations and evaluations will be performed to evaluate subject eligibility on the basis of the fact that the subject characteristics and inclusion criteria (1) to (4), (6), and (7) are met, and the exclusion criteria (1) to (14) are not met. If ineligible, the appropriate items will be identified. The required items, such as the qualification results, will be entered into the case registration system, and results will be obtained.

(1) Patient characteristics at the initiation of the observation period

- 1) Subject identification code
- 2) Date of acquisition of consent
- 3) Sex
- 4) Date of birth
- 5) Diagnosis

- Diagnosis according to the updated Awaji criteria (see 4.1 Diagnostic Criteria)
- Diagnosis according to El Escorial revised Airlie House diagnostic criteria (see 4.1 Diagnostic criteria)

(Electromyography and nerve conduction studies may be performed within one year prior to the initiation of the observation period. Electromyography and nerve conduction studies may be evaluated using the results of tests conducted at other medical institutions.)

6) History of the present illness

- Timing of onset of ALS, type of onset (familial ALS, sporadic ALS), initial presentation (upper extremity, lower extremity type,

Spherical type), and the severity of ALS (see Criteria for Severity of 4.2 ALS)

- Availability of tracheostomy, non-invasive respiratory support devices
- Presence or absence of SOD1 mutations (only subjects with previous SOD1 genetic testing)
- History of administration of edaravone more than four weeks prior to enrollment in the observation period (including reasons for switching)

7) Complications

Diseased at the initiation of the observation period

8) Medical history

- Drug allergy or severe allergic disease (anaphylactic shock, etc.)
- Poliomyelitis and neurodegenerative diseases other than ALS (which may affect the onset and pathology of ALS)

Disorders thought to be

9) Concomitant medication/treatment

10) Other

- Whether the patient is pregnant or possibly pregnant (verbally confirmed: female subjects only)
- Whether the woman has consented to contraception, including her partner
- Whether the subject has participated in another clinical trial within 12 weeks prior to the initiation of the observation period

- 1119       • Use of riluzole
- 1120     (2) Efficacy endpoint
- 1121       1) ALSFRS-R
- 1122       2) %FVC
- 1123     (3) Safety endpoint
- 1124       1) Laboratory tests (including hematology, biochemistry, and vitamin B12 determinations,
- 1125            urinalysis)
- 1126       2) 12-lead ECG
- 1127       3) Vital signs (systolic/diastolic blood pressure, pulse rate)
- 1128       4) Adverse event
- 1129

**9.2.1.2. Observation period Week 12 (Completion of the observation period)**

1131     At Week 12 of the observation period, subjects will be assessed for eligibility on the basis of  
1132     examinations of the following examination and evaluation items, conforming to the subject characteristics  
1133     and inclusion criteria (3) and (5) to (7), and not conflicting with the exclusion criteria (1)-(4), (7)-(11) and  
1134     (13)-(14). If ineligible, identify the appropriate items. Enter the required items such as qualification results  
1135     in the case registration system, and obtain the results and drug numbers.

- 1136     (1) Patient characteristics at the completion of the observation period
- 1137       1) Diagnosis
- 1138           • Diagnosis according to the updated Awaji criteria (see 4.1 Diagnostic Criteria)
- 1139           • Diagnosis according to El Escorial revised Airlie House diagnostic criteria (see 4.1
- 1140            Diagnostic criteria)
- 1141       2) History of the present illness
- 1142           • Severity of ALS (see Criteria for Severity of 4.2 ALS)
- 1143           • Availability of tracheostomy, non-invasive respiratory support devices
- 1144       3) Concomitant medication/treatment
- 1145       4) Height and weight
- 1146     (2) Efficacy endpoint
- 1147       1) ALSFRS-R
- 1148       2) %FVC
- 1149       3) MMT (performed only eligible for treatment)
- 1150       4) Grip strength test (performed only in eligible patients for treatment)
- 1151       5) Norris scale (performed only for eligible patients in the treatment period)
- 1152       6) ALSAQ 40 (performed only in eligible patients for treatment)
- 1153       7) The concentration of homocysteine in the blood
- 1154     (3) Safety endpoint
- 1155       1) Laboratory tests (hematology, biochemistry, urinalysis, pregnancy tests [only premenopausal
- 1156            female subjects except those undergoing sterilization undergo pregnancy tests])
- 1157       2) 12-lead ECG
- 1158       3) Vital signs (systolic/diastolic blood pressure, pulse rate)
- 1159       4) Adverse event
- 1160     (4) Use of riluzole
- 1161

**9.2.2. Treatment Period (Week 0, 4, 8, 16, and Discontinuation of Study)**

1163     The Treatment period is defined as the Treatment period from Week 0 (initial day of administration)  
1164     to Week 16 of the Treatment period. The following evaluations and investigations on the efficacy and  
1165     safety will be conducted. However, if discontinuation due to "death" occurs, only information on the  
1166     occurrence of the event should be checked. Furthermore, %FVC measurement after tracheostomy is  
1167     not required.

**9.2.2.1. Week 0 of the Treatment period**

- 1169     (1) Safety endpoint
  - 1170
-

- 1171 1) 12-lead ECG
- 1172 2) Adverse event
- 1173 (2) Use of riluzole
- 1174 (3) Tracheostomy status
- 1175 (4) Treatment compliance with the investigational product (day of administration, proportion of
- 1176 injections administered at the time of administration, presence or absence of drug holidays,
- 1177 washout period, withdrawal from pharmacology, discontinuation, and reasons for
- 1178 discontinuation)
- 1179 (5) Concomitant medication/treatment
- 1180 (6) Discontinuation
- 1181 Presence or absence of discontinuation, date of discontinuation, and reason for discontinuation
- 1182

#### 9.2.2.2. Week 4, 8, 16, and Discontinuation of Study

- 1183 (1) Efficacy endpoint
- 1184 1) Name of event (daily use of non-invasive respiratory support device, wearing of invasive
- 1185 respiratory support device or death), date of event
- 1186 2) ALSFRS-R
- 1187 3) %FVC (performed at 8 and 16 weeks of treatment)
- 1188 4) MMT (performed at 8 and 16 weeks of treatment)
- 1189 5) Grip strength test (performed at 8 and 16 weeks of treatment)
- 1190 6) Norris scale (administered at 8 and 16 weeks of treatment)
- 1191 7) ALSAQ 40 (performed at 8 and 16 weeks of treatment)
- 1192 8) The concentration of homocysteine in the blood (only at 16 weeks of treatment)
- 1193 (2) Safety endpoint
- 1194 1) Laboratory tests (hematology, biochemistry, and urinalysis) (performed at Weeks 4 and 16,
- 1195 or at the time of discontinuation)
- 1196 2) 12-Lead ECG (performed once between Week 8 of treatment and the last day of treatment at
- 1197 Week 15 or at the time of discontinuation)
- 1198 3) Vital signs (systolic/diastolic blood pressure, pulse rate)
- 1199 4) Adverse event
- 1200 (3) Use of riluzole
- 1201 (7) Tracheostomy status
- 1202 (8) Treatment compliance with the investigational product (day of administration, proportion of
- 1203 injections administered at the time of administration, presence or absence of drug holidays,
- 1204 washout period, withdrawal from pharmacology, discontinuation, and reasons for
- 1205 discontinuation)
- 1206 (9) Concomitant drug/concomitant therapy (Patients who have experienced an event within 28 days
- 1207 of the last day of administration of the investigational product [the last day of administration of
- 1208 the investigational product is day 0] are to be recorded on the Case Report Form for concomitant
- 1209 treatment until the day of the event)
- 1210 (10) Discontinuation
- 1211 Presence or absence of discontinuation, date of discontinuation, and reason for discontinuation
- 1212
- 1213

#### 9.2.3. Continuous Treatment Period (Every 12 weeks, Completion or Discontinuation of Study)

1214 The Continuous treatment period is defined as the period from the evaluation at Week 16 of the

1215 Treatment period (end date of the Treatment period) to the completion of the Continuous treatment period.

1216 The following evaluation/investigation items related to efficacy and safety will be implemented. However,

1217 if discontinuation due to "death" occurs, only information on the occurrence of the event should be

1218 checked. Furthermore, %FVC measurement after tracheostomy is not required.

1219

- 1220 (1) Efficacy endpoint
- 1221 1) Name of event (daily use of non-invasive respiratory support device, wearing of invasive
- 1222 respiratory support device or death), date of the event, and cause of onset
- 1223 2) ALSFRS-R

- 1224 (2) Safety endpoint  
1225 1) Laboratory tests (hematology, biochemistry, urinalysis)  
1226 2) 12-lead ECG  
1227 3) Vital signs (systolic/diastolic blood pressure, pulse rate)  
1228 4) Adverse event  
1229 (3) Tracheostomy status  
1230 (4) The status of administration of the investigational drug (judgment of the propriety of self-  
1231 administration by the principal investigator, etc. {[if applicable] the status of coordination of  
1232 administration of the investigational drug, including whether it is administered by the subject or  
1233 by a family member}, the date of administration, the rate of injection administration, the presence  
1234 or absence of drug holidays, the duration of drug holidays, the absence or absence of  
1235 pharmacology, the presence or absence of discontinuation, and the reason for discontinuation).  
1236 (5) Concomitant medication/treatment  
1237 (Discontinuation cases in which an event occurs within 28 days of the last day of administration of  
1238 the investigational product [the last day of administration of the investigational product is day 0] will  
1239 be recorded on the Case Report Form concomitant treatment until the day of the event.)  
1240 (6) Discontinuation  
1241 Presence or absence of discontinuation, date of discontinuation, and reason for discontinuation  
1242  
1243

## 1244 **10. EVALUATION**

1245 On the basis of the statement in this section, efficacy, ALSFRS, and safety evaluators independently  
1246 conduct evaluations and surveys until Week 16 of the Treatment period. Independent evaluation is not  
1247 required during the Continuous treatment period, and all evaluations, investigations, and administration  
1248 of the investigational product are permitted by the investigator and others.  
1249

### 1250 **10.1. Person Injecting the Investigational drug and Person Conducting Evaluation**

#### 1251 **10.1.1. Person in Charge of Efficacy Evaluation**

- 1252 1) Efficacy assessor requirements (it is necessary to meet all of the following)  
1253 • The principal investigator or the sub-investigator  
1254 • Neurologists (regardless of their department if they have experience with ALS treatment other  
1255 than neurologists)  
1256 • Physicians other than safety assessors  
1257 • Physician other than the investigational drug administrator  
1258 2) Role of the efficacy assessor

1259 Efficacy variables will be evaluated at the initiation of the observation period, at the completion of the  
1260 observation period, at Weeks 4, 8, 16 of the Treatment period, or at the time of discontinuation. The  
1261 efficacy assessor will evaluate the results of the following endpoints:

- 1262 • Event occurrence  
1263 • %FVC  
1264 • MMT (only eligible for treatment)  
1265 • Grip strength test (performed only in eligible patients for treatment)  
1266 • Norris scale (performed only for eligible patients in the treatment period)  
1267 • ALSAQ 40 (only in eligible patients for treatment)  
1268

#### 1269 **10.1.2. Person in Charge of the ALSFRS-R Evaluation**

- 1270 1) Requirements for ALSFRS-R assessors (it is required to meet all of the following)  
1271 • The principal investigator, the sub-investigator, or the clinical research coordinator other than the  
1272 investigational drug administrator shall be the physician or nurse. However, it may be performed  
1273 by the efficacy assessor.  
1274 • ALSFRS-R assessors need to learn in advance using training materials.  
1275 2) Roles of ALSFRS-R assessors

1276 ALSFRS-R will be evaluated at the initiation of the observation period, at the completion of the  
1277 observation period, at Weeks 4, 8, and 16 of the Treatment period, or at the time of discontinuation.  
1278

1279 **10.1.3. Person in Charge of the Safety Evaluation**

1280 1) Requirements of the safety assessor (it is necessary to meet all of the following)

- 1281 • The principal investigator or the sub-investigator
- 1282 • Neurologist
- 1283 • Physicians other than the efficacy assessors
- 1284 • Physician other than the investigational drug administrator

1285 2) Role of the safety assessor

1286 Symptoms and signs, etc. will be checked by the subject's medical examination (interview, visual  
1287 inspection, auscultation, etc.) at the initiation of the observation period, at the completion of the  
1288 observation period, at Weeks 4, 8, 16 of the Treatment period, or at the time of discontinuation, and  
1289 safety evaluations will be conducted. In addition, instruct the investigational drug administrator to  
1290 administer the investigational drug. In addition, the efficacy assessor will be informed of the subject's  
1291 condition, which will need to be worn for all days of non-invasive respiratory support, wear invasive  
1292 respiratory support devices, or assess the time to death.

1293 If the safety assessor becomes aware of the color of the urine, the information will not be shared with  
1294 other persons involved in the clinical trial.  
1295

1296 **10.1.4. Person Injecting the Investigational drug**

1297 1) Requirements for subjects who received the investigational product (need to meet all of the  
1298 following)

- 1299 • Investigator, sub-investigator, or study collaborator
- 1300 • Physicians or nurses other than efficacy, ALSFRS-R, and safety assessors

- 1301 • When administered in-hospital:

1302 Those who can appropriately administer the investigational product in the hospital and prepare the  
1303 in-house E0302 Administration Record Form and report it to the safety assessor.

- 1305 • When administered out-of-hospital:

1306 A person who can appropriately administer the investigational product at a patient's home or nearby  
1307 medical institution and prepare an E0302 treatment record form for external use and report it to the  
1308 safety assessor.  
1309

1310 2) Role of the person receiving the investigational product

1311 In principle, the investigational drug administrator will prepare and administer the investigational  
1312 product twice weekly in accordance with "5.5 Administration of the investigational product" according to  
1313 the instructions for administration by the safety assessor.

1314 The investigational drug administrator shall prepare the "In-house E0302 Administration Record Form"  
1315 when administering the treatment in-house, and the "External E0302 Administration Record Form" when  
1316 administering the treatment at the subject's home or nearby medical institution, and report to the safety  
1317 assessor (see "5.5.2 Preparation and Administration Methods").

1318 In order to ensure blinding, the investigational drug administrator should pay attention to the following  
1319 points:

- 1321 • Prepare and administer the investigational product in accordance with the "Procedures for  
1322 Administration of E0302 Investigational Product" and ensure that the color of the  
1323 investigational product is not visible to the subjects and their families during the Treatment  
1324 period.
- 1325 • Information regarding the investigational product and color of urine will not be shared with  
1326 other study personnel during the Treatment period.
- 1327 • Place used vials in a small box.
- 1328 • Dispose of used syringes (needles) appropriately.

1329  
1330

1331 **10.2. Items and Method of Efficacy Evaluation**

1332 **10.2.1. ALSFRS-R**

1333 The status of activities of daily living and respiratory function will be investigated, the ALSFRS-R (see  
1334 Table 10-1)<sup>18</sup> will be evaluated, and scores recorded in the Case Report Form in accordance with the  
1335 ALSFRS-R Assessment Guide. Whenever possible, the same evaluator will evaluate the ALSFRS-R of  
1336 the same subject.

1337  
1338 **Table 101 ALSFRS-R10-1**

|                                                                                                                                                                                                                                                                                                                                                                                                                                                                                                                                                                                                                                                                                                                                                                                                                                                                                                                                                                                                                                                                                                                                                                                                                                                                                                                                                                                                                                                                                                                                                                                                                                                      |                                                                                                                                                                                                                                                                                                                                                                                                                                                                                                                                                                                                                                                                                                                                                                                                                                                                                                                                                                                                                                                                                                                                                                                                                                                                                                                                                                                                                                                                                                                                                                                                                                                                                                                    |
|------------------------------------------------------------------------------------------------------------------------------------------------------------------------------------------------------------------------------------------------------------------------------------------------------------------------------------------------------------------------------------------------------------------------------------------------------------------------------------------------------------------------------------------------------------------------------------------------------------------------------------------------------------------------------------------------------------------------------------------------------------------------------------------------------------------------------------------------------------------------------------------------------------------------------------------------------------------------------------------------------------------------------------------------------------------------------------------------------------------------------------------------------------------------------------------------------------------------------------------------------------------------------------------------------------------------------------------------------------------------------------------------------------------------------------------------------------------------------------------------------------------------------------------------------------------------------------------------------------------------------------------------------|--------------------------------------------------------------------------------------------------------------------------------------------------------------------------------------------------------------------------------------------------------------------------------------------------------------------------------------------------------------------------------------------------------------------------------------------------------------------------------------------------------------------------------------------------------------------------------------------------------------------------------------------------------------------------------------------------------------------------------------------------------------------------------------------------------------------------------------------------------------------------------------------------------------------------------------------------------------------------------------------------------------------------------------------------------------------------------------------------------------------------------------------------------------------------------------------------------------------------------------------------------------------------------------------------------------------------------------------------------------------------------------------------------------------------------------------------------------------------------------------------------------------------------------------------------------------------------------------------------------------------------------------------------------------------------------------------------------------|
| <p><u>1. Speech</u><br/>4: Normal speech processes<br/>3: Detectable speech disturbance<br/>2: Intelligible with repeating<br/>1: Speech combined with nonvocal communication<br/>0: Loss of useful speech</p> <p><u>2. Salivation</u><br/>4: Normal<br/>3: Slight but definite excess of saliva in mouth; may have nighttime drooling<br/>2: Moderately excessive saliva; may have minimal drooling (during the day)<br/>1: Marked excess of saliva with some drooling<br/>0: Marked drooling; requires constant tissue or handkerchief</p> <p><u>3. Swallowing</u><br/>4: Normal eating habits<br/>3: Early eating problems – occasional choking<br/>2: Dietary consistency changes<br/>1: Needs supplement tube feeding<br/>0: NPO (exclusively parenteral or enteral feeding)</p> <p><u>4. Handwriting</u><br/>4: Normal<br/>3: Slow or sloppy: all words are legible<br/>2: Not all words are legible<br/>1: Able to grip pen, but unable to write<br/>0: Unable to grip pen</p> <p><u>5a. Cutting food and handling utensils (patients without gastrostomy)?</u><br/>4: Normal<br/>3: Somewhat slow and clumsy, but no help needed<br/>2: Can cut most foods, although clumsy and slow; some help needed<br/>1: Food must be cut by someone but can still feed slowly<br/>0: Needs to be fed</p> <p><u>5b. Cutting food and handling utensils (alternate scale for patients with gastrostomy)?</u><br/>4: Normal<br/>3: Clumsy but able to perform all manipulations independently<br/>2: Some help needed with closures and fasteners<br/>1: Provides minimal assistance to the caregiver<br/>0: Unable to perform any aspect of the task</p> | <p><u>6. Dressing and hygiene</u><br/>4: Normal function<br/>3: Independent and complete self-care with effort or decreased efficiency<br/>2: Intermittent assistance or substitute methods<br/>1: Needs attendant for self-care<br/>0: Total dependence</p> <p><u>7. Turning in bed and adjusting bed clothes</u><br/>4: Normal<br/>3: Somewhat slow and clumsy, but no help needed<br/>2: Can turn alone or adjust sheets, but with great difficulty<br/>1: Can initiate, but not turn or adjust sheets alone<br/>0: Helpless</p> <p><u>8. Walking</u><br/>4: Normal<br/>3: Early ambulation difficulties<br/>2: Walks with assistance<br/>1: Nonambulatory functional movement<br/>0: No purposeful leg movement</p> <p><u>9. Climbing stairs</u><br/>4: Normal<br/>3: Slow<br/>2: Mild unsteadiness or fatigue<br/>1: Needs assistance<br/>0: Cannot do</p> <p><u>10. Dyspnea</u><br/>4: None<br/>3: Occurs when walking<br/>2: Occurs with one or more of the following: eating, bathing, dressing (ADL)<br/>1: Occurs at rest, difficulty breathing when either sitting or lying<br/>0: Significant difficulty, considering using mechanical respiratory support</p> <p><u>11. Orthopnea</u><br/>4: None<br/>3: Some difficulty sleeping at night due to shortness of breath, does not routinely use more than two pillows<br/>2: Needs extra pillows in order to sleep (more than two)<br/>1: Can only sleep sitting up<br/>0: Unable to sleep</p> <p><u>12. Respiratory insufficiency</u><br/>4: None<br/>3: Intermittent use of BiPAP<br/>2: Continuous use of BiPAP during the night<br/>1: Continuous use of BiPAP during the night and day<br/>0: Continuous use of BiPAP during the night and day</p> |
|------------------------------------------------------------------------------------------------------------------------------------------------------------------------------------------------------------------------------------------------------------------------------------------------------------------------------------------------------------------------------------------------------------------------------------------------------------------------------------------------------------------------------------------------------------------------------------------------------------------------------------------------------------------------------------------------------------------------------------------------------------------------------------------------------------------------------------------------------------------------------------------------------------------------------------------------------------------------------------------------------------------------------------------------------------------------------------------------------------------------------------------------------------------------------------------------------------------------------------------------------------------------------------------------------------------------------------------------------------------------------------------------------------------------------------------------------------------------------------------------------------------------------------------------------------------------------------------------------------------------------------------------------|--------------------------------------------------------------------------------------------------------------------------------------------------------------------------------------------------------------------------------------------------------------------------------------------------------------------------------------------------------------------------------------------------------------------------------------------------------------------------------------------------------------------------------------------------------------------------------------------------------------------------------------------------------------------------------------------------------------------------------------------------------------------------------------------------------------------------------------------------------------------------------------------------------------------------------------------------------------------------------------------------------------------------------------------------------------------------------------------------------------------------------------------------------------------------------------------------------------------------------------------------------------------------------------------------------------------------------------------------------------------------------------------------------------------------------------------------------------------------------------------------------------------------------------------------------------------------------------------------------------------------------------------------------------------------------------------------------------------|

1339  
1340  
1341 **10.2.2. Event Occurrence**

1342 Events are defined as "wearing a non-invasive respiratory assist device all day," "wearing an invasive  
1343 respiratory assistance device," or "death" due to progression of the primary disease, and their occurrence  
1344 will be investigated. For "death," however, all events are regarded as events regardless of the cause. When  
1345 an event occurs, the term of the event and the date of occurrence of the event is recorded in the Case  
1346 Report Form. The date of the event is the date on which the non-invasive respiratory support device is



1347 worn at night (at least 22 hours), the date on which the invasive respiratory support device is initiated, or  
1348 the date of death. Even in cases of discontinuation, if an event occurs within 28 days of the last day of  
1349 administration of the investigational product (the last day of administration of the investigational product  
1350 is day 0) in the relevant subject, the term of the event, the date of occurrence of the event, and concomitant  
1351 treatment until the date of occurrence of the event are recorded in the Case Report Form.

1352 In addition, in this clinical trial, "wearing a non-invasive respiratory support device on the whole day"  
1353 or "wearing an invasive respiratory support device" caused by accidents, accidental complications, etc.  
1354 will not be handled as an event, and the details of the event, the date of occurrence, and the reason for  
1355 judgment that the event was not due to progression of the underlying disease will be recorded in the Case  
1356 Report Form.

1357 When wearing a non-invasive respiratory support device is initiated, in principle, the investigational  
1358 drug administrator will investigate the total wearing time twice weekly on the day prior to administration  
1359 and enter the E0302 Administration Record Form for in-house use or the E0302 Administration Record  
1360 Form for out-of-hospital use. In addition, the efficacy evaluator will understand the status of the subject's  
1361 respiratory compromise on the basis of information obtained from the safety assessor and the  
1362 investigational drug administrator and will respond according to the subject's condition. Whenever  
1363 possible, the same assessor will assess the occurrence of events in the same subject.  
1364

#### 1365 **10.2.3. %FVC**

1366 The %FVC will be measured, and the measurement date, measurement position (standing and sitting  
1367 position), and measurement results will be recorded in the Case Report Form. The measurement position  
1368 may be either the standing position or the sitting position, but as far as possible, the same evaluator shall  
1369 measure it in the same measurement position.  
1370

#### 1371 **10.2.4. The concentration of Homocysteine in the Blood**

1372 The concentration of homocysteine in the blood will be measured centrally by SRL Medisearch Inc.,  
1373 an external laboratory. The results will not be disclosed to the investigators etc., of the participating  
1374 medical organization until disclosure.  
1375

#### 1376 **10.2.5. MMT**

1377 On the basis of the MMT Examination Sheet (Appendix 5), the MRC score will be used to assess the  
1378 strength of the neck anteflexion, shoulder abduction, elbow flexion, wrist dorsiflexion, hip flexion, and  
1379 ankle dorsiflexion (total of 11 muscles), and the score for each muscle strength will be reported on the  
1380 date of assessment.  
1381

#### 1382 **10.2.6. Grip Test**

1383 Measurements are made using a grip dynamometer. As a rule, two measurements will be taken  
1384 alternately, and the highest values for each evaluation date and right and left should be reported.  
1385

#### 1386 **10.2.7. Norris Scale**

1387 On the basis of the Norris Scale Worksheet (Appendix 6), the Limb Symptom Scale (21 items) and the  
1388 Spherical Symptom Scale (13 items) are rated on a 4-point scale, and the date of assessment and scores  
1389 for each item are reported. In addition, the same evaluator shall perform the test on the same subject as  
1390 much as possible.  
1391

#### 1392 **10.2.8. ALSAQ-40**

1393 On the basis of the ALSAQ 40 Questionnaire (Appendix 7), the results of the questionnaires  
1394 administered by the subjects or their families will be reported.  
1395

### 1396 **10.3. Items and Method of Safety Evaluation**

#### 1397 **10.3.1. Clinical Laboratory Test**

1398 Laboratory tests will be performed for the following:

1399 Measurement:

- 1400 • Hematology: WBC, RBC, Hb, Hct, platelet count

- 1401       • Blood chemistry studies: total protein, total bilirubin, AST (GOT), ALT (GPT),  $\gamma$ -GTP, Al-P,  
1402       LDH, CK, BUN, creatinine, albumin, total cholesterol, triglycerides, Na, K, Cl, vitamin B12 (at  
1403       the initiation of the observation period only)  
1404       • Urinalysis: Urine sugar, urinary protein, urinary urobilinogen, pregnancy test (only for  
1405       premenopausal women except those who were sterilized at the completion of the observation  
1406       period)

1407       In addition, when administering the investigational drug on the day of blood and urine collection, blood  
1408       and urine are collected prior to administration of the investigational drug.  
1409

#### 1410 **10.3.2. Electrocardiogram (ECG)**

1411       At rest, a 12-lead ECG will be measured, and the measurement date and results (presence or absence  
1412       of abnormalities and, during the Treatment period, measurements of QT assessment: heart rate, RR  
1413       interval, PR interval, QRS duration, QT interval, QTcB, and QTcF) will be recorded in the CRF.

1414       During the treatment period, ECG measurements will be performed twice at 1-minute intervals prior to  
1415       and 2 hours ( $\pm$ 1 hour) after dosing, during the first infusion, and between Week 8 ( $\pm$ 1 week) and Week  
1416       15, the last injection (or discontinuation). As far as possible, this ECG measurement should be performed  
1417       at the same time period, and the patient will be fasted for at least 8 hours prior to the administration on  
1418       the day of the visit. In addition, the ECG results during the Treatment period will be sent to the Study  
1419       Coordinating Office. The ECG should be interpreted by a blinded cardiologist. The results of the reading  
1420       will be forwarded to the investigator etc., as a report. Corrected intervals to be reported by the cardiologist  
1421       to the principal investigator, etc., shall be QTcB and QTcF.

1422       Electrocardiogram measurements at the time of discontinuation during the Treatment period are to be  
1423       performed once, regardless of whether a meal is used. There is also no need to report to a cardiologist.  
1424

#### 1425 **10.3.3. Vital signs**

1426       Blood pressure (systolic and diastolic) and pulse rate will be measured, and the date of measurement  
1427       and test results will be recorded in the Case Report Form.  
1428

#### 1429 **10.3.4. Adverse Events**

1430       Symptoms and signs related to the safety of subjects that occur after obtaining informed consent will  
1431       be examined (interview, inspection, auscultation, etc.) and, if any unfavorable observation tended  
1432       symptoms and signs are observed, recorded in the Adverse Events section in the Case Report Form.  
1433       However, the incidence of serious adverse events will be investigated up to 28 days after completion  
1434       (discontinuation) of administration.

1435       Follow-up will generally be conducted until the prognosis of symptoms and signs is known. The time  
1436       of completion of follow-up will depend on the medical judgment of the safety assessor.

1437       In this clinical investigation, events judged by the safety assessor as aggravation of symptoms  
1438       associated with progression of the primary disease (including tracheostomy, the appendix of a non-  
1439       invasive respiratory support device, the appendix of an invasive respiratory support device, appearance  
1440       or aggravation of subjective symptoms related to decreased respiratory function, and gastrostomy,  
1441       excluding death) will not be handled as adverse events.  
1442

1443       In principle, subjects or their families will be instructed to inform them in advance when they visit  
1444       other departments or hospitals from the time of acquisition of consent to completion or at the time of  
1445       discontinuation. The investigator or sub-investigator will check whether the subject has been examined  
1446       by another department or another medical institution. When a subject visits another department or other  
1447       hospital, the details of treatment will be checked with the attending physician of another department or  
1448       other hospital, and information such as adverse events and concomitant treatment will be recorded on the  
1449       Case Report Form.  
1450

#### 1451 **10.4. Status of Riluzole Medication**

1452       The daily dose, the initial day of administration, and the date of completion of administration of riluzole  
1453       (when the Treatment period is completed, the date or "continued after completion") will be examined and  
1454       recorded in the Case Report Form for the status of use of riluzole. If the daily dose of riluzole is changed,

1455 the date of the change, the daily dose after the change, and the reason for the change should be recorded.  
1456

### 1457 **10.5. Status of Tracheotomy**

1458 The status of implementation of tracheostomy (presence or absence of tracheostomy and date of  
1459 tracheostomy) will be recorded in the Case Report Form.  
1460

### 1461 **10.6. Status of Investigational drug Administration**

1462 The drug number and date of administration will be recorded on the Case Report Form on the basis of  
1463 the Hospital E0302 Administration Record Form and the External E0302 Administration Record Form  
1464 described by the investigational drug administrator or the E0302 Self-Administration Implementation  
1465 Sheet written by the subject or family. Two vials will be used at the time of one dose administration. If  
1466 the administration is not possible due to the subject's condition, the date and details will be recorded in  
1467 the Case Report Form.

1468 In the event of a drug holiday, the initiation and completion days of the drug holiday are recorded in  
1469 the Case Report Form.  
1470

### 1471 **10.7. Concomitant Treatment**

1472 Subjects will be instructed to comply with regulations prohibiting concomitant treatment and  
1473 restrictions. Combination therapy will also be investigated on the basis of the following:

#### 1474 1) Concomitant medication

1475 For all drugs used during the period from acquisition of consent to completion or discontinuation, the  
1476 following items will be investigated and recorded in the Case Report Form. When treatment is  
1477 administered at other departments or other hospitals, the details of the prescription will be checked with  
1478 the attending physician from other departments or other hospitals and recorded on the Case Report Form.  
1479 However, physiological saline, infusion, etc., are not required to be recorded on the Case Report Form.

1480 Name of the drug, daily dose, the initial day of administration (if initiated before obtaining informed  
1481 consent, "continued from before obtaining informed consent"), date of completion of administration (if  
1482 continued after completion of treatment, "continued after completion of treatment"), route of  
1483 administration, and reasons for administration (underlying disease, complications, adverse events, and  
1484 others).

1485 For riluzole, a restricted concomitant drug, the daily dose, the initial day of administration, and the date  
1486 of completion of administration (when the Treatment period is completed, the date or "continued after  
1487 completion") will be investigated and recorded in the Case Report Form. If the daily dose of riluzole is  
1488 changed, the date of the change, the daily dose after the change, and the reason for the change should be  
1489 recorded.

#### 1490 2) Combination Therapy

1491 For all treatments administered at the time of informed consent, completion, or discontinuation, the  
1492 following items will be investigated and recorded in the Case Report Form. In the event of treatment at  
1493 other departments or other hospitals, the details shall be checked with the attending physician of other  
1494 departments or other hospitals and recorded on the Case Report Form.  
1495

1496 Name of therapy, the reason for treatment, date of initiation of treatment (date of continuation prior to  
1497 the obtainment of informed consent or date of completion of treatment in the case of commencement of  
1498 administration or later), date of completion of treatment (date of completion of treatment or continuation  
1499 after completion of treatment in the case of completion of treatment)

1500 Rehabilitation and nutritional management are investigated as follows.  
1501

#### 1502 • Rehabilitation

1503 The presence or absence of rehabilitation will be investigated from the initiation to the completion or  
1504 discontinuation of the observation period. If rehabilitation has been performed, the name of therapy for  
1505 rehabilitation (motor function [upper extremity, lower extremity], respiratory function, and frequency,  
1506 etc.), date of treatment initiation, and date of treatment completion (date or "continued after completion"  
1507 if treatment is completed) will be recorded in the Case Report Form.

1508

1509 • Nutritional management

1510 The presence or absence of any treatment related to nutritional management will be investigated from  
1511 the initiation to the completion or discontinuation of the observation period. If any measures related to  
1512 nutritional management are implemented, the details (e.g., nasogastric tube feeding, IVH, or PEG) will  
1513 be investigated, and in the case of nasogastric tube feeding and IVH, the initiation and completion dates  
1514 will be recorded in the Case Report Form, and in the case of PEG, the date of implementation will be  
1515 recorded in the Case Report Form.

1516

### 1517 **10.8. Premature Termination or Suspension**

1518 The presence or absence of discontinuation, the date of discontinuation, and the reason thereof are  
1519 recorded on the Case Report Form. If a subject is withdrawn from the study due to pregnancy, the effects  
1520 on the fetus/birth will be followed up to confirm the results.

1521

1522

## 1523 **11. APPROPRIATENESS OF EFFICACY EVALUATION**

1524 The appropriateness of the efficacy investigation items established in this study is shown below.

1525

1526 1) Change in ALSFRS-R total score from the date of randomization to 16 weeks of the Treatment period

1527 The ALSFRS-R is a clinical rating scale designed to objectively and quantitatively assess the course of  
1528 patients with ALS and can clinically assess the impairment of limb motor, bulbar, and respiratory function  
1529 in patients with ALS.

1530 ALSFRS-R is frequently used as the primary endpoint in recent studies in patients with ALS. Since  
1531 ALSFRS-R is reliable enough to evaluate the clinical symptoms of ALS and can be used for clinical  
1532 evaluation<sup>19</sup> in both total score and item-specific score, the change in ALSFRS-R total score was set as  
1533 the primary endpoint in this study. In addition, the inter-rater variability was considered to be minimized  
1534 by having each assessor learn in advance.

1535

1536 2) Time to the event (permanent use of a non-invasive respiratory support device, placement of an  
1537 invasive respiratory support device, or death)

1538 ALS is a life-threatening disease that occurs within 3 to 6 years of onset. In addition, the WFN  
1539 guidelines state that "change in muscle strength, survival time is the most informative primary endpoint."  
1540 Therefore, it was considered essential to consider "survival time" in this study as well. Although "survival  
1541 time" has been evaluated as the time to death or tracheostomy events in conventional clinical studies in  
1542 ALS patients, the use of non-invasive respiratory support devices as one of the life support devices for  
1543 ALS patients has become popular in recent years. Therefore, it is considered appropriate to include the  
1544 use of non-invasive respiratory support devices throughout the day as an event. For this reason, an event  
1545 was defined as permanent wear of a non-invasive respiratory assist device, placement of an invasive  
1546 respiratory support device, or death.

1547

1548 3) %FVC

1549 %FVC has been described in the ALS Treatment Guideline 2013<sup>14</sup> as an objective measure of  
1550 respiratory function in patients with ALS and is suitable for assessing the progression of respiratory  
1551 dysfunction. Since it is also used as an endpoint in clinical studies of ALS, the change in %FVC was set  
1552 as one of the secondary endpoints in this study.

1553

1554 4) The concentration of homocysteine in the blood

1555 Homocysteine has been implicated in the pathogenesis of ALS through a variety of putative neurotoxic  
1556 mechanisms.<sup>19</sup> To investigate the mechanism of action of E0302, it was considered appropriate to measure  
1557 the concentration of homocysteine in the blood and set it as an endpoint.

1558

1559 5) MMT

1560 Muscle strength can be assessed noninvasively without the use of special equipment and is also

1561 recommended as one of the appropriate strength tests in the ALS clinical trial guidelines.<sup>21</sup> In addition, it  
1562 was set because it is used in the clinical trial of ALS.

1563

1564 6) Grip strength

1565 Muscle atrophy was set because grip weakness is often the first symptom, and the measurement of grip  
1566 strength is simple, the examination time is short, and it is safe.

1567

1568 7) Norris scale

1569 This was established as an evaluation scale of the physical function of the ALS patient and considered  
1570 to be reliable.<sup>22</sup>

1571

1572 8) ALSAQ-40

1573 This was developed as a QOL scale specific to ALS and was established because it has been validated  
1574 by reliability (reproducibility) and validity of the original version, and also the validity of the Japanese  
1575 version.<sup>23</sup>

1576

1577

## 1578 **12. ADVERSE EVENTS, SERIOUS ADVERSE EVENTS, AND THEIR** 1579 **REPORTING**

### 1580 **12.1. Definition of Adverse Events**

#### 1581 **12.1.1. Adverse Events**

1582 Adverse events include any unfavorable observation of tended disease or its symptoms, signs, or  
1583 abnormal changes in laboratory values, etc., occurring in a subject after obtaining informed consent,  
1584 regardless of relation to the investigational product. Events judged by the safety assessor as aggravation  
1585 of symptoms associated with progression of the primary disease (including tracheostomy, wearing of a  
1586 non-invasive respiratory support device, the appendix of an invasive respiratory support device,  
1587 appearance/aggravation of subjective symptoms related to decreased respiratory function, etc. and  
1588 gastrostomy, excluding death) will not be handled as adverse events.

1589

#### 1590 **12.1.2. Adverse Events Associated with Abnormal Change in Laboratory Parameters**

1591 Values within the reference range are considered normal, whereas those outside this range are  
1592 considered abnormal according to the reference values of the study site.

1593

##### 1594 **12.1.2.1. An abnormal change in laboratory findings**

1595 If laboratory test values are confirmed and "abnormal values" that are outside the reference range are  
1596 observed, abnormal changes are defined as medical problems determined by the safety assessor in  
1597 reference to the "Inclusion Criteria for Laboratory Values and Abnormalities in Blood Pressure and Pulse  
1598 Rate" (Appendix 3). If there are abnormal changes, the event is handled as an adverse event, and the  
1599 appropriate term of the event is recorded in the Case Report Form after consideration of the clinical  
1600 symptoms and signs.

1601 The safety assessor will follow the incident until the outcome of the adverse event is known. The time  
1602 of completion of the follow-up will be determined according to the medical judgment of the safety  
1603 assessor.

1604

##### 1605 **12.1.2.2. Abnormal changes in ECG and vital signs**

1606 The safety assessor will check the electrocardiogram and vital signs and refer to the Criteria for  
1607 Classification of Seriousness of Adverse Drug Reactions (Appendix 4) for abnormal values. Any finding  
1608 that meets Grade 2 on the ECG after administration is regarded as an abnormal change and is recorded in  
1609 the Adverse Events section in the Case Report Form. In addition, in reference to the "Inclusion Criteria  
1610 for Laboratory Tests and Abnormal Blood Pressure and Pulse Rate" (Appendix 3), the safety evaluator  
1611 judges whether the change in the relevant measurement is clinically problematic. If the change is  
1612 considered abnormal at completion or discontinuation, it is handled as an adverse event, and the  
1613 appropriate term of the event is recorded in the Case Report Form, taking into consideration the clinical

1614 symptoms and signs.

1615

1616 **12.1.3. Serious Adverse Events**

1617 "Serious adverse event" refers to the following:

1618 (1) Death

1619 (2) Life-threatening

1620 Note: "Life-threatening" means that the subject is at risk of dying when the event occurs and may  
1621 not have resulted in death if the event is more severe.

1622 (3) Need for hospitalization or prolongation of hospitalization

1623 (4) Results in permanent or significant disability/incapacity

1624 (5) Is a congenital anomaly/congenital disability

1625 (6) Other medically important condition \*

1626 \*: Significant events that are not immediately life-threatening or leading to death or hospitalization  
1627 but which jeopardize the subject or require treatment to avoid the consequences described in (1)-  
1628 (5) above are also considered serious.

1629

1630 In addition, the following hospitalizations that do not accompany adverse events are not regarded as  
1631 "serious adverse events" among "3) those requiring hospitalization or prolongation of the hospitalization  
1632 period."

- 1633 • Hospitalization for temporary treatment for reasons other than an adverse event (short stay, respite  
1634 hospitalization [short stay for nursing leave])
- 1635 • Hospitalization due to ambulatory difficulties associated with the progression of the underlying  
1636 disease
- 1637 • Hospitalization for Training in Introduction of a Non-invasive Respiratory Assist Device

1638

1639 **12.2. Evaluation of Adverse Events**

1640 For adverse events that occurred, the term of the event, date of onset, severity, seriousness, outcome,  
1641 date of the outcome, causal relationship with the investigational product, and treatment of the  
1642 investigational product will be recorded in the Adverse Events section in the Case Report Form. When  
1643 recording the name of the disease, the symptoms associated with the disease will not be recorded as an  
1644 adverse event.

1645

1646 **12.2.1. Items of Adverse Events**

1647 **12.2.2. The severity of Adverse Event**

1648 The safety assessor will evaluate the severity of the adverse event on a three-point scale (mild, moderate,  
1649 or severe) on the basis of the following criteria (Table 12-1) and record it on the Case Report Form. The  
1650 severity of adverse events on the basis of abnormal changes in laboratory values, electrocardiograms, and  
1651 vital signs will be assessed by the safety evaluator and recorded on the Case Report Form with reference  
1652 to Notification No. 80 of the Safety Division, Pharmaceutical Affairs Bureau, MHW, entitled "Criteria for  
1653 Classification of Seriousness of Adverse Drug Reactions" (Appendix 4). The terms "Grade 1" and "Grade  
1654 2" and "Grade 3" as specified in Notification No. 80 of the Safety Division, PAB shall correspond to  
1655 "Mild" and "Moderate" and "Severe," respectively.

1656

1657

**Table 121 Criteria for Severity12-1**

| Classify    | Criteria                                                                     |
|-------------|------------------------------------------------------------------------------|
| 1. Mild     | Degree of discomfort that does not interfere with normal daily activities    |
| 2. Moderate | Degree of discomfort that interferes with normal daily activities            |
| 3. Severe   | Inability to work or become incapacitated to perform normal daily activities |

1658

1659 **12.2.3. The seriousness of Adverse Event**

1660 1: Non-serious 2: Serious

1661

1662 **12.2.4. Reasons for Causal Relationship between Adverse event and Investigational drug**

1663 The reason for judgment as serious will be selected from among (1) to (6) in "11.1.3 Serious Adverse  
1664 Events".

1665

1666 **12.2.5. The outcome of Adverse Event**

1667 1: Disappearance 2: remission (in recovery) 3: unchangeable 4: deterioration 5: sequelae 6: death

1668

1669 **12.2.6. Causal Relationship of Adverse Events with Investigational drug**

1670 The causal relationship with the investigational product will be determined by the safety assessor  
1671 with reference to Table 12-2, taking into account the subject's condition, the temporal relationship  
1672 between administration of the investigational product and the onset, etc. The causal relationship to the  
1673 investigational product is "2. Adverse events for which a causal relationship could not be ruled out  
1674 (adverse reactions). If the event is not related, the event should be classified as "1. Not related" and  
1675 regarded as an adverse event for which a causal relationship can be ruled out. If an adverse event is  
1676 considered unrelated, the reason for the assessment will be recorded in the Case Report Form.

1677

1678

1679  
1680

**Table 12-2 Criteria for Evaluation of Causal Relationship to the Investigational Product for Adverse Events**

|                     |                                                                                                                                                                                                                                                                                                                                                    |
|---------------------|----------------------------------------------------------------------------------------------------------------------------------------------------------------------------------------------------------------------------------------------------------------------------------------------------------------------------------------------------|
| 1.<br>Not relevant. | A clinical event, including an abnormal laboratory finding, in which a temporal relationship between the time of onset of the adverse event and the investigational product is unclear, or in which a cause other than the investigational product (e.g., a risk factor that increases the incidence of adverse events in subjects) is identified. |
| 2.<br>Related       | Clinical events, including abnormal laboratory values that occur after administration of the investigational product and occur over a time-course related to the investigational product and are unlikely to be caused by disease at the time of onset, other concomitant drugs, or environmental factors, etc.                                    |

1681  
1682  
1683  
1684  
1685

**12.2.7. Action Taken with Investigational drug**

1: Continuation 2: Discontinuation 3: Discontinuation (washout period, washout period), 4: After completion of administration, 5: Other (other reasons)

1686

**12.3. Response to Adverse Events**

1687  
1688  
1689  
1690  
1691  
1692  
1693

If an adverse event occurs after obtaining informed consent, the investigator or sub-investigator will take appropriate measures to treat the adverse event and continue to monitor it as much as possible until improvement or stabilization (for laboratory values within the reference range of the study site or prior to treatment) is achieved, regardless of the causal relationship with the investigational product. However, this does not apply when the safety assessor determines that the adverse event has disappeared from the effect of the investigational product, ensures the safety of the subject, and does not require further follow-up.

1694  
1695  
1696

The assessment of adverse events will be assessed by the safety assessor according to "12.1 Definitions of Adverse Events" and "12.2 Assessment of Adverse Events". Adverse events that were considered related to the investigational product are regarded as adverse drug reactions.

1697  
1698  
1699

In addition, if a serious adverse event is observed, the procedure described in "12.6 Disclosure of the Emergency Key Code" should be followed.

1700

**12.4. Serious Adverse Events**

1701

**12.4.1. Reporting of Serious Adverse Events**

1702  
1703  
1704  
1705  
1706

If a serious adverse event occurs between the day of the last dose of the investigational drug and Day 28, the investigator or sub-investigator will respond as follows. The serious adverse event may be related to the investigational product. However, if a serious adverse event occurred on or after 29 days after the last dose of an investigational drug for each subject, which the safety assessor judged to be related to the study, is observed, the same measures will be taken.

1707  
1708  
1709  
1710  
1711  
1712  
1713  
1714  
1715  
1716

- 1) The investigator or sub-investigator should provide the head of each medical institution and the coordinating investigator with the primary report (within 24 hours of knowledge: within one working day at the latest), secondary report (within seven days: not mandatory if a full report is included in the primary report), detailed investigation report, and final report.
- 2) The coordinating investigator will immediately report the reported serious adverse events (within three working days of the knowledge of the investigator etc.) to the principal investigator and the supplier of the other participating medical organization. In addition, if the reported serious adverse event meets the following requirements, the coordinating investigator will report it to the regulatory authority within the specified time frame.

1717  
1718

[REQUIREMENTS FOR REPORTING TO REGULATORY AUTHORITY AND REPORTING DEFINITIONS]

1719  
1720  
1721  
1722  
1723

Patients with serious adverse events whose causal relationship to the investigational product cannot be ruled out and who meet the following criteria (1) to (3) are subject to expedited reporting. The coordinating investigator will report the SAE within the following timeframe from the date the investigator becomes aware of the SAE according to its content.

1724

- (1) Of the serious adverse events unexpected from the investigator's brochure, "death" and "potentially



- 1725 fatal" occurred within seven days.  
1726 (2) Of the serious adverse events unexpected by the investigator's brochure, within 15 days, except  
1727 those listed above (1).  
1728 (3) Of the serious adverse events expected in the investigator's brochure, "death" and "potentially fatal  
1729 case" within 15 days.  
1730

1731 After consultation with the coordinating investigator, the investigator will seek the opinion of the  
1732 Efficacy and Safety Assessment Committee on whether to continue the study, etc., as necessary and  
1733 subsequently decide on the measures to be taken thereafter.

1734 ※ In the event of a serious adverse event that may result in death or death related to the  
1735 investigational product, registration of the patient will be suspended and reviewed by the Efficacy and  
1736 Safety Evaluation Committee.  
1737  
1738  
1739  
1740  
1741  
1742  
1743  
1744  
1745  
1746  
1747  
1748  
1749  
1750  
1751  
1752  
1753  
1754  
1755  
1756  
1757  
1758  
1759  
1760  
1761  
1762  
1763  
1764  
1765  
1766  
1767  
1768  
1769  
1770  
1771  
1772  
1773  
1774  
1775  
1776  
1777

1778  
1779  
1780  
1781  
1782  
1783  
1784  
1785  
1786  
1787  
1788  
1789  
1790  
1791  
1792  
1793  
1794  
1795  
1796  
1797  
1798  
1799  
1800  
1801  
1802  
1803  
1804  
1805  
1806  
1807  
1808  
1809  
1810  
1811  
1812  
1813  
1814  
1815  
1816  
1817  
1818  
1819  
1820  
1821  
1822  
1823  
1824  
1825  
1826  
1827  
1828  
1829  
1830  
1831

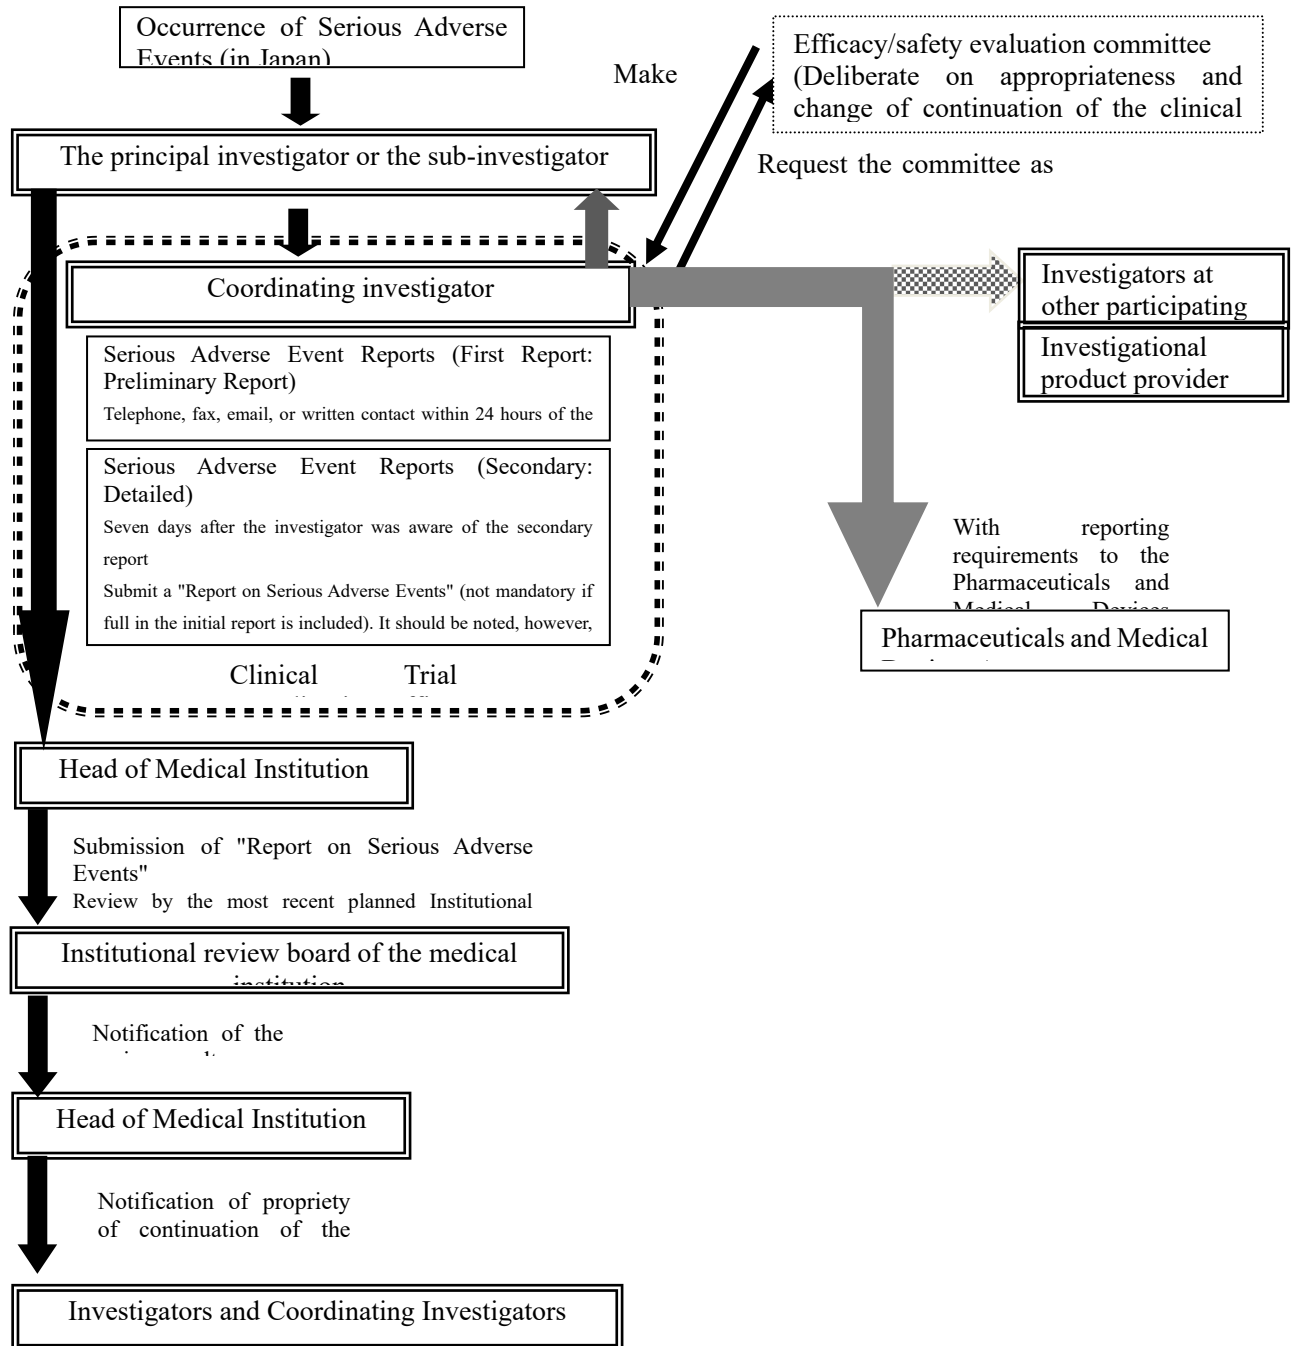

\*1: The submission deadline, format, etc., shall be in accordance with the provision of Notification No. 0329 of the PFSB and Notification No. 14 of the PFSB.

**Figure 12-1 Flow diagram of reporting and response in the event of an SAE.**

1832 **12.5. Possible Side Effects**

1833 No serious adverse events were observed in the Phase I single-dose study (E0302-E044-001) and the  
1834 Phase I multiple-dose study (E0302-E044-002). In Phase II/III study (E0302-J081-761), cardiac arrest  
1835 was reported as a serious adverse event for which a causal relationship could not be ruled out. In the  
1836 Phase III study (E0302-J081-762), urinary stones were reported as serious adverse events for which a  
1837 causal relationship could not be ruled out. Adverse reactions observed in the Phase I single-dose study,  
1838 Phase I multiple-dose study, Phase II/III study, and Phase III study are shown in Table 12-2.  
1839

1840 **Table 122 Adverse Reactions in Clinical Phase I, Phase II/III, and Phase III Studies-2**

| Study                                                                                                                   | E0302 Dosage    | Administration Pathway. | Side Effects                                                                                                                                                                                                                                                                                                                                                    |
|-------------------------------------------------------------------------------------------------------------------------|-----------------|-------------------------|-----------------------------------------------------------------------------------------------------------------------------------------------------------------------------------------------------------------------------------------------------------------------------------------------------------------------------------------------------------------|
| Investigations of phases I Single-dose studies (E0302-E044-001) [Twenty-four Japanese and 24 Caucasians, respectively]. | 25 mg (n=12)    | IM injection            | Headache (1 Caucasian)                                                                                                                                                                                                                                                                                                                                          |
|                                                                                                                         | 50 mg (n=12)    | IM injection            | Injection site pain (2 events in one Japanese)                                                                                                                                                                                                                                                                                                                  |
|                                                                                                                         | 75 mg (n=12)    | IM injection            | Headache (one Caucasian), nausea (one Caucasian)                                                                                                                                                                                                                                                                                                                |
|                                                                                                                         | Placebo (n=12)  | IM injection            | -                                                                                                                                                                                                                                                                                                                                                               |
| Investigations of phases I Repeat-dose study (E0302-E044-002) [Eighteen Japanese and 18 Caucasians (7 days)].           | 25 mg (n=12)    | IM injection            | -                                                                                                                                                                                                                                                                                                                                                               |
|                                                                                                                         | 50 mg (n=12)    | IM injection            | Dizziness (one Japanese), vulvovaginal discomfort (one Caucasian), and acneiform dermatitis (one Caucasian)                                                                                                                                                                                                                                                     |
|                                                                                                                         | Placebo (n=12)  | IM injection            | -                                                                                                                                                                                                                                                                                                                                                               |
| Phase II/III study (E0302-J081-761) [370 Japanese (182 weeks)].                                                         | 25 mg (n=124)   | IM injection            | Injection site induration (1 patient), abnormal liver function (2 patients), leukocytosis (1 patient), increased blood cholesterol (1 patient), increased blood urea nitrogen (1 patient), increased blood alkaline phosphatase (1 patient), sensory disturbance (1 patient), erythema (1 patient), and pruritus (1 patient)                                    |
|                                                                                                                         | 50 mg (n=123)   | IM injection            | Cardiac arrest (1 patient), liver disorder (1 patient), folliculitis (1 patient), increased white blood cell count (2 patients), increased platelet count (1 patient), positive urinary protein (1 patient), hypocalcemia (1 patient), urinary stones (1 patient), acne (1 patient), subcutaneous hemorrhage (1 patient), and seborrheic dermatitis (1 patient) |
|                                                                                                                         | Placebo (n=123) | IM injection            | Injection site pain (2 patients), liver enzyme elevation (1 patient), allergic dermatitis (1 patient), and urticaria (1 patient)                                                                                                                                                                                                                                |
| Phase III (E0302-J081-762) [147 Japanese]. Cut-off Data, 31 October 2014*                                               | 50 mg (n=147)   | IM injection            | Supraventricular extrasystole (1 patient), gastroesophageal reflux disease (1 patient), positive urinary protein (3 patients), increased blood bilirubin (1 patient), increased blood urea nitrogen (1 patient), urticaria (1 patient), hypertension (2 patients)                                                                                               |

1841 \*: The Continuous treatment period was conducted in subjects who completed Study E0302-J081-761. Aggregate data  
1842 until the last day of the 52-week assessment obtained by the cut-off date as of October 2014. Urinary stones occurred in

1843 one subject as a serious adverse reaction after the last day of Week 52. In addition, no serious side effects were  
1844 observed in three other clinical studies in ALS.  
1845

## 1846 **12.6. Opening of Emergency Key Code**

1847 When it is deemed necessary to ensure the safety of subjects, such as when it becomes necessary to  
1848 know the key code for the investigational product in a medical emergency, the principal investigator can  
1849 break the emergency key code. The emergency key code-breaking procedure is shown below.  
1850

1851 [Emergency key code-breaking procedure]

- 1852 1) The principal investigator will contact the coordinating investigator if it is deemed necessary to  
1853 know the details of the investigational product administered to the subject in order to ensure the  
1854 safety of the subject, such as if a serious adverse event occurs to the subject.
- 1855 2) The coordinating investigator will interview the necessary items (name of the contacting  
1856 investigator, drug number, the title of the study subject, and folder-back contact) and request that  
1857 the allocation manager of the investigational product break the emergency key code of the relevant  
1858 subject. The investigational product assignment manager will break the emergency key code for  
1859 the relevant subject and promptly notify the principal investigator of the results thereof by fax.
- 1860 3) Adverse events that contributed to the request for emergency code unblinding will be handled as  
1861 serious adverse events. By doing so, the investigator or sub-investigator will promptly report the  
1862 report to the coordinating investigator and the head of the study site using a predetermined format  
1863 ("Report on Serious Adverse Events" [Unified Form 12]) and record the reason for requesting  
1864 emergency key code-breaking in the Case Report Form. The coordinating investigator will record  
1865 the reason for the request for disclosure, the history of disclosure, and the contact information for  
1866 the results of disclosure.
- 1867 4) The coordinating investigator will record the reason why the principal investigator and the  
1868 coordinating investigator decided that emergency key code-breaking is necessary, the history of  
1869 emergency key code-breaking, and the contact information for the results of disclosure.  
1870

## 1871 **12.7. Opening of Emergency Key Code on the Request of Regulatory Authority**

1872 On the basis of the SAEs reported to the regulatory authorities during the study, the regulatory authority  
1873 may decide that unblinding is necessary to ensure the safety of subjects. If disclosure is requested by the  
1874 coordinating investigator, emergency key codes may be used to break the code. The emergency key code-  
1875 breaking procedure is shown below.  
1876

1877 [Emergency key code-breaking procedure]

- 1878 1) On the basis of the serious adverse events reported by the coordinating investigator during the  
1879 study, the regulatory authority determines that it is necessary to know the allocation results (test  
1880 drug or placebo) of the investigational product administered to the subject to ensure the safety of  
1881 the subject. If disclosure is instructed to the coordinating investigator, the coordinating investigator  
1882 will check the required items (name of the physician, name of the study problem, drug number,  
1883 and folder-back contact) and request the allocation manager of the investigational product to break  
1884 the emergency key code of the relevant subject.
- 1885 2) The investigational product assignment manager will promptly report the results of disclosure to  
1886 the coordinating investigator.
- 1887 3) The coordinating investigator will promptly report the results of disclosure to the regulatory  
1888 authority.
- 1889 4) When breaking the emergency key code, the coordinating investigator will inform the principal  
1890 investigator of the details of disclosure and the results of disclosure.
- 1891 5) The coordinating investigator will record the reason for the regulatory authority's decision that  
1892 emergency key code-breaking is necessary, the history of emergency key code-breaking, and the  
1893 contact information for the results of disclosure.  
1894

1895 **13. DISCONTINUATION OF INDIVIDUAL SUBJECTS**

1896 **13.1. Criteria for Discontinuation of Study**

1897 In the following cases, the investigator or sub-investigator will discontinue the study.

- 1898 1) When a subject refuses to continue participating in the clinical trial or withdrew consent.  
1899 2) When an adverse event occurs and the principal investigator or the sub-investigator judges, it  
1900 difficult to continue the clinical trial.  
1901 3) If the subject's pregnancy was reported.  
1902 4) Subjects were found to be ineligible prior to initiation of treatment.  
1903 5) Subjects were found to be ineligible after initiation of treatment.  
1904 6) When the emergency key code is unlocked.  
1905 7) When the principal investigator or the sub-investigator judges the discontinuation of the clinical  
1906 trial to be appropriate in terms of efficacy evaluation or safety assurance, etc.  
1907 8) Withdrawal of at least 15 days from the last dosing day in the Treatment period  
1908 9) In the Continuous treatment period, the drug was withdrawn for at least 29 days from the  
1909 administration day immediately prior to administration.  
1910 10) Use of prohibited concomitant drugs or therapies during the period from the initiation of the  
1911 observation period to Week 16 of the Treatment period (refer to "6.2.1 Prohibited Concomitant  
1912 Drugs/Treatments" and "6.2.3 Concomitant Therapies").  
1913 11) When a new dose of riluzole is initiated during the period from the initiation of the observation  
1914 period to Week 16 of the Treatment period, the daily dose of riluzole is increased, or the daily dose  
1915 of riluzole is decreased or discontinued, and subsequently, the dose is increased or re-administered.  
1916 12) Events (all-day non-invasive breathing device wear, invasive respiratory support device wear or  
1917 death)  
1918

1919 **13.2. Procedures for Discontinuation of Study**

1920 The investigator or sub-investigator should promptly inform the subject of the termination of the  
1921 study and provide appropriate medical care and take other necessary measures. The predetermined  
1922 parameters at the time of discontinuation (the day on which the physician judged the discontinuation)  
1923 and the reason thereof is recorded in the Case Report Form. The predetermined parameters will be  
1924 investigated and evaluated after the last dose of the investigational drug and within  $\pm 2$  weeks from the  
1925 date of discontinuation.

1926 If a subject is withdrawn from the study due to pregnancy, follow up the effects on the fetus/offspring  
1927 and report the results to the coordinating investigator and the investigational product provider.

1928 Even in cases of discontinuation, if an event occurs within 28 days of the last day of administration of  
1929 the investigational product (the last day of administration of the investigational product is considered  
1930 day 0) (see "10.2.2 Event Occurrence") in the relevant subject, the term of the event, the date of  
1931 occurrence of the event, and concomitant treatment until the date of occurrence of the event are  
1932 recorded in the Case Report Form.

1933 Among patients enrolled in the treatment period, ALSFRS-R evaluations and investigations of  
1934 concomitant drugs/therapies will be performed as much as possible until Week 16 of the Treatment period  
1935 unless patients discontinued from the Treatment period, excluding patients who have not received  
1936 treatment unless they refuse to continue participation in the study or have requested to withdraw consent.  
1937 If ambulatory is difficult, the ALSFRS-R will be assessed by telephone survey, and concomitant  
1938 medications/therapies will be surveyed in reference to the ALSFRS-R telephone survey flow diagram.  
1939

1940 **14. COMPLETION, PREMATURE TERMINATION, OR SUSPENSION**  
1941 **OF STUDY**

1942 **14.1. Completion of Study**

1943 The principal investigator confirms that the data have been fixed after completion of the observation,  
1944 examination, and investigation specified in this protocol for all subjects and reports to the head of the

1945 medical institution that the clinical trial has been completed and the summary of the clinical trial results  
1946 in writing.

1947 The head of the medical institution shall promptly notify the Institutional Review Board of the  
1948 completion of the study in writing and report the summary of the results of the study on the basis of the  
1949 report submitted by the principal investigator. This time point is the completion of the study.

1950

## 1951 **14.2. Premature Termination or Suspension of Study**

### 1952 **14.2.1. Criteria for Premature Termination or Suspension**

1953 The coordinating investigator will discontinue or suspend the study in consultation with the principal  
1954 investigator in the following cases:

- 1955 1) Serious adverse events that may lead to death or death considered related to the investigational  
1956 product in the study (temporary suspension of patient registration)
- 1957 2) When it is recommended by the Efficacy and Safety Evaluation Committee that the entire clinical  
1958 trial be discontinued or suspended
- 1959 3) When the Institutional Review Board recommends discontinuation or suspension
- 1960 4) Any change in the development policy of the principal investigator or coordinating investigator
- 1961 5) Recommendations for discontinuation by the regulatory authority
- 1962 6) Other situations in which part or all of the clinical trial must be discontinued or suspended.

1963

### 1964 **14.2.2. Procedures for Premature Termination or Suspension**

1965 If any item falls under "14.2.1 Criteria for Discontinuation or Suspension," the investigator or sub-  
1966 investigator will immediately notify the subject to that effect to ensure appropriate treatment and follow-  
1967 up for the subject.

1968 If discontinuation/suspension of the study is decided, the coordinating investigator will immediately  
1969 report to all investigators and report to the Efficacy and Safety Assessment Committee, the supplier of the  
1970 investigational drug, and the regulatory authority. The principal investigators etc., shall promptly inform  
1971 the subjects of the discontinuation and the reasons thereof to ensure the safety of the subjects.

1972 The principal investigator shall report this in writing to the head of the medical institution, the  
1973 Institutional Review Board, and the related departments of the participating medical organization and  
1974 shall follow the procedures specified by the relevant participating medical organization.

1975 The investigational product assignment manager confirms that the investigational product recalled  
1976 from the study site is sealed by the Supervisor of the Investigational Drug and opens the seal to confirm  
1977 the number of remaining drugs, etc. Subsequently, seal again, and report the confirmation results of the  
1978 amount of residual drug to the coordinating investigator.

1979

1980

## 1981 **15. PROTOCOL COMPLIANCE, DEVIATION/AMENDMENT, AND** 1982 **REVISION**

### 1983 **15.1. Protocol Compliance**

1984 The investigator will initiate the study after the protocol has been approved by the Institutional Review  
1985 Board and authorization from the head of the study site has been obtained. The content of the protocol  
1986 should be followed in the conduct of the study.

1987

### 1988 **15.2. Protocol Deviation or Amendment**

1989 The principal investigator and the sub-investigator must not deviate from or change the protocol  
1990 without written approval on the basis of the prior review of the Institutional Review Board, except for  
1991 the following cases.

- 1992 (1) When it is unavoidable for medical purposes, such as by avoiding emergent hazards to the  
1993 subjects
- 1994 (2) When changes are made only to administrative matters related to the clinical trial

1995 In the case of (1) above, the principal investigator must submit the details and reasons of the deviation  
1996 or change, and if amendment of the protocol is appropriate to the head of the medical institution and the  
1997 Institutional Review Board as soon as possible to obtain approval and obtain the agreement of the head  
1998 of the medical institution.

1999 The principal investigator and the sub-investigator will record all actions that have deviated from the  
2000 protocol and retain records explaining the reasons, etc.

2001 The principal investigator will promptly submit a report to the head of the medical institution and to  
2002 the Institutional Review Board on any changes that may seriously affect the conduct of the study or  
2003 increase the risk to subjects.  
2004

### 2005 **15.3. Revision of Protocol and Case Report Form**

2006 If an amendment to the protocol is required after the initiation of the study, the investigator will review  
2007 the protocol and revise it after hearing the opinions of the members of the protocol and report the details  
2008 and reasons for the amendment to the Institutional Review Board of the participating institution. If the  
2009 revision is deemed critical, it must be reviewed and approved by the investigator's Institutional Review  
2010 Board. Refer to the "Procedures for Preparation of the Protocol" for the revision procedure.  
2011  
2012

## 2013 **16. CASE REPORT FORM**

### 2014 **16.1. Preparation and Reporting CRF**

2015 Data collection on the Case Report Form (CRF) in this study will be conducted using EDC. EDC is  
2016 operated according to various procedures prepared in accordance with ER/ES guidelines. Case data will  
2017 be entered directly from the site using a web browser. These data collected by EDC are regarded as the  
2018 CRF. Preparation of the CRF shall be in accordance with the separately defined CRF Entry Manual.

2019 Changes or amendments to CRFs will be made in accordance with the separately specified Guidance  
2020 for Changes and Amendments to CRFs.  
2021

### 2022 **16.2. Essential Points in Preparing CRF**

2023 CRFs will be prepared promptly.

2024 The principal investigator confirms that there are no problems in the record content of the CRF prepared  
2025 by the sub-investigator or the study collaborator and subsequently electronically signs the record on the  
2026 EDC.

2027 If there is any discrepancy between the CRF records and the source documents, the investigator will  
2028 prepare a record explaining the reasons for the discrepancy.  
2029  
2030

## 2031 **17. DIRECT ACCESS TO SOURCE DOCUMENTS**

### 2032 **17.1. Identification of Source Data**

2033 The following documents shall be regarded as source documents.

- 2034 (1) Medical records, nursing records, examination data, imaging film, and data stored in the  
2035 electronic medical record
- 2036 (2) Records related to consent and provision of information to subjects
- 2037 (3) Records related to the administration of the investigational drug
- 2038 (4) Records, etc. of Clinical Trials Required by the GCP Ordinance  
2039

2040 The CRF records themselves will normally be used as source documents for the following items that  
2041 are not listed in medical records, etc. However, the relevant medical records, etc., shall be regarded as  
2042 source documents if they are recorded in the medical records, etc.

- 2043 (1) Items to be confirmed that they meet the inclusion criteria and do not conflict with the exclusion  
2044 criteria

- 2045 (2) Diagnosis, severity, seriousness, the reason for judgment as a serious, outcome, date of the  
2046 outcome, investigational drug of the adverse event  
2047 Causal relationship  
2048 (3) Findings for laboratory data  
2049 (4) Efficacy Evaluations of the Investigational Product (Scores for Variables of ALSFRS-R)  
2050 (5) Purpose of coadministration  
2051 (6) Reason for combination therapy  
2052 (7) Reason for Request for Disclosure of Emergency Key Code  
2053 (8) Reasons for discontinuation  
2054

## 2055 **17.2. Direct Access to Source Documents by Monitor**

### 2056 **17.2.1. Access to Source Documents**

2057 The head of the medical institution and the principal investigator must accept investigations by  
2058 monitors, auditors, the Institutional Review Board, and regulatory authorities appointed by the  
2059 coordinating investigator and must provide all study-related records, including source data, for direct  
2060 access (including copies). In addition, the subject agrees to direct access by signing the consent form.  
2061

### 2062 **17.2.2. Monitoring**

2063 The investigator has ethical, legal, and scientific responsibility for the conduct of the study. The  
2064 coordinating investigator will appoint a monitor who will provide or obtain up-to-date information on the  
2065 study by periodic site visits or by telephone, etc., in accordance with the "Procedures for Monitoring"  
2066 specific to the study and will retain the records.  
2067  
2068

## 2069 **18. STATISTICAL ANALYSIS METHOD**

2070 Analyses will be performed using the analysis software SAS for Windows (release 9.3 or more recent).  
2071 The significance level of the test is 15% on both sides to determine the homogeneity between groups,  
2072 2.5% on one side to evaluate the significance of the efficacy endpoint, and 5% on the other side. The  
2073 analysis will be performed using data from the Treatment period only (at the time of application) and  
2074 analysis during the Continuous treatment period (at the completion of the study). The main methods of  
2075 analysis on the basis of data from the Treatment period only are described below, but the analysis On the  
2076 basis of data from the Continuous treatment period and subsequent periods is performed according to the  
2077 analysis on the basis of data from the Treatment period only.  
2078

### 2079 **18.1. Determination of Sample Size**

2080 The target sample size for this study was 64 subjects in each group and 128 subjects in both groups.  
2081 The rationale for the target number of subjects and the history of changes are described below.

#### 2082 1) Analysis method

2083 This is a randomized controlled trial of two groups (placebo and E0302 - 50 mg) with the primary  
2084 endpoint of change in ALSFRS-R total score from the date of allocation of to 16 weeks of the Treatment  
2085 period to verify the superiority of E0302 to placebo. In a mixed-effects repeated measures data analysis  
2086 (MMRM model), the change in ALSFRS-R total score from randomization to Week 16 will be  
2087 compared between placebo and E0302 - 50 mg and will be considered significant if the lower bound  
2088 of the 95% confidence interval for the least-squares mean difference is  $>0$ .

#### 2089 2) Endpoints and Estimates Used to Calculate Target Sample Size

2090 In Phase II/III study (E0302-J081-761), an estimate of the change in total ALSFRS-R scores was  
2091 estimated using data from a subset of patients who experience symptoms for  $\leq$ one year at the  
2092 initiation of the observation period and whose total ALSFRS-R scores decreased by 1-2 points during  
2093 the observation period (12 weeks). The mean  $\pm$  SD of the change in ALSFRS-R total score at 16  
2094 weeks was  $-3.2 \pm 4.0$  in the mecobalamin 50 mg group (26 patients in the E0302 - 50 mg group in this  
2095 study) and  $-5.8 \pm 5.0$  in the placebo group (n = 32) (mean difference: -2.6). On the basis of these



2096 results, the target sample size calculation for this study assumed that the ALSFRS-R total score for  
2097 the E0302 - 50 mg group was-3.2, the ALSFRS-R total score for the placebo group was-5.8, and the  
2098 E0302 - 50 mg group outperformed the placebo group by  $\Delta$  (2.6 points).

2099 To account for the variation due to changes in ALS diagnostic criteria and participating centers  
2100 compared to the Phase II/III study (E0302-J081-761), the larger standard deviation (5.0) in the  
2101 mecobalamin 50 mg group and the placebo group (in terms of change in ALSFRS-R total score) was  
2102 set as the common standard deviation across the study.

2103 3) Calculation of target sample size

2104 A minimum of 60 subjects per group will be required to achieve a type I error probability of  $\leq 2.5\%$   
2105 and a power of  $\geq 80\%$  in a one-sided test. In addition, in view of withdrawals during the study, the  
2106 target number of subjects for this study was 64 per group, totaling 128.  
2107

## 2108 18.2. Statistical Analysis Plan

### 2109 18.2.1. Definition of Analysis Sets

#### 2110 18.2.1.1. Classification of Subjects

2111 The definitions of subjects in this study are shown in Table 18-1 and Figure 18-1.  
2112  
2113

**Table 181 Definitions of Subject Classification-1**

| Term                                          | Definition                                                                                                                                                                                |
|-----------------------------------------------|-------------------------------------------------------------------------------------------------------------------------------------------------------------------------------------------|
| Patients enrolled in the observation period   | Subjects who are eligible for the study at the initiation of the observation period, confirmed by the registration center, and enrolled in the observation period.                        |
| Discontinuation during the observation period | Subjects who were enrolled in the observation period and were withdrawn from the study without enrollment during the Treatment period                                                     |
| Patients enrolled in the Treatment period     | Subjects who are eligible for the study at the completion of the observation period, confirmed by the registration center, and enrolled in the Treatment period.                          |
| Untreated cases                               | Subjects who are enrolled in the Treatment period and have never received the investigational product.                                                                                    |
| Patients who completed the Treatment period   | Subjects who have completed the Treatment period                                                                                                                                          |
| Patients who discontinued treatment           | Subjects who discontinued the study prior to completion of the study Treatment period because they meet the criteria for withdrawal from the study after commencement of study treatment. |

2114  
2115  
2116  
2117  
2118  
2119  
2120  
2121  
2122  
2123  
2124  
2125

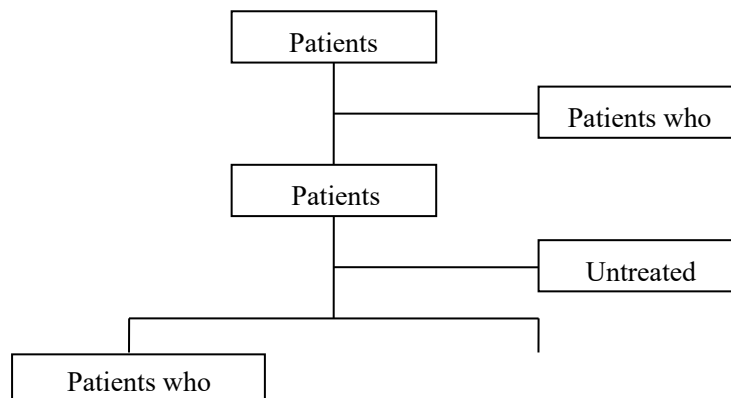

2126  
2127  
2128  
2129  
2130  
2131  
2132  
2133  
2134  
2135  
2136

Patients who

**Figure 181 Subject disposition-1**

**18.2.1.2. Deviations from Study Protocol**

Table 18-2 lists the definitions of subjects enrolled in the treatment period who deviate from the protocol. The person responsible for statistical analysis will select subjects meeting these definitions in consultation with the coordinating investigator.

2137

**Table 182 Subjects with Protocol Deviations2**

| Classify                                               | Definition                                                                                                                                                                                                                                                                                                                                                                                                                                                                                                                                       |
|--------------------------------------------------------|--------------------------------------------------------------------------------------------------------------------------------------------------------------------------------------------------------------------------------------------------------------------------------------------------------------------------------------------------------------------------------------------------------------------------------------------------------------------------------------------------------------------------------------------------|
| Deviations prior to enrollment in the Treatment period | Subjects with a protocol deviation prior to enrollment in the Treatment period <ul style="list-style-type: none"> <li>• Ineligible subjects (those who do not meet the inclusion or exclusion criteria)</li> <li>• Examples of Deviations Regarding Screening Procedures</li> </ul>                                                                                                                                                                                                                                                              |
| Deviations after enrollment in the Treatment period    | Subjects with a protocol deviation after enrollment in the Treatment period <ul style="list-style-type: none"> <li>• Deviations in dosage and administration (cumulative injection rate of the investigational product is &lt;70%)</li> <li>• Concomitant treatment deviation</li> <li>• Examples of Deviations Related to Investigation and Evaluation Procedures</li> <li>• Withdrawals not meeting discontinuation criteria</li> <li>• Patients who meet the discontinuation criteria but did not discontinue the Treatment period</li> </ul> |

2138

2139

**18.2.1.3. Analytical Handling of Subjects**

2140

After consultation with the coordinating investigator, the statistical analysis manager will determine the handling of analysis of all subjects prior to unblinding, on the basis of the definitions of the analysis population described in the following section, after considering the handling of individual subjects for analysis.

2141

2142

2143

2144

2145

**18.2.1.4. Efficacy Analysis Set**

2146

However, the primary analysis population will be FAS, and PPS will be positioned as a secondary analysis population to confirm consistency with the results obtained from FAS from a sensitivity analysis perspective.

2147

2148

2149

1) FAS

2150

Among patients enrolled in the treatment period, FAS is defined as the set excluding those subjects who meet the following criteria:

2151

2152

- Subjects who do not meet the primary inclusion criteria (inclusion criteria [1] to [5])

2153

- Subjects who fall under a GCP violation, such as administration outside the study period or not obtaining informed consent

2154

2155

- Subjects with no data on the components of the primary endpoint that can be assessed (ALSFRS-R)

2156

2157

- Subjects who have not received the investigational product

2158

2) PPS

2159

Of the patients enrolled in the treatment period, those who meet the following criteria will be excluded from the population.

2160

2161

- Subjects who do not meet the primary inclusion criteria (inclusion criteria [1] to [5])

2162

- Subjects who fall under a GCP violation, such as administration outside the study period or not obtaining informed consent

2163

2164

- Subjects with no data from Week 8 onward regarding the composition of the primary endpoint that can be assessed (ALSFRS-R)

2165

2166

- Subjects who met exclusion criteria affecting efficacy assessment (exclusion criteria [1], [8], [14])

2167

- Subjects who have a cumulative injection rate of <70% of the investigational product prior to the completion or discontinuation date of treatment

2168

2169

- Subjects who discontinue treatment and participate in the study <8 weeks during the treatment period

2170

2171

- Subjects who have not received the investigational product

2172

2173 **18.2.1.5. Safety Analysis Set**

2174 Of the patients enrolled in the treatment period, the safety analysis population (SAS: Safety Analysis  
2175 Set) excluding those subjects who meet the following criteria will be used.

- 2176 • Subjects who have not obtained informed consent
- 2177 • Subjects who do not meet the inclusion criteria for the primary target disease (inclusion criteria  
2178 [1] to [5])
- 2179 • Subjects who have not received the investigational product
- 2180 • Subjects with no evaluable safety data

2181

2182 **18.2.1.6. Handling of Data**

2183 The handling of data is as follows. The statistical analysis manager should discuss with the coordinating  
2184 investigator the handling of data for all subjects prior to unblinding and specify the details in the separate  
2185 analysis plan.

2186 1) Handling of missing data

2187 In order to specify the handling of each item, the items to be supplemented with missing data are  
2188 described in "5) Handling of data at each evaluation time" or in "Statistical analysis."

2189 2) Handling of Measured Values Out of the Permissible Range Specified

2190 The acceptable ranges for efficacy endpoints (ALSFRS-R, concentration of homocysteine in the  
2191 blood, %FVC) and safety endpoints (laboratory and vital signs) are one week for Treatment periods 4  
2192 and 8 weeks and two weeks for a Treatment period of 16 weeks. For data that deviate from these  
2193 tolerance ranges, the person responsible for statistical analysis will decide whether or not to use the  
2194 data in consultation with the coordinating investigator. If more than one data value is within the  
2195 relevant range, the absolute difference between the specified evaluation date and the number of days  
2196 is calculated, and the data with the minimum absolute value is used as the data for the evaluation  
2197 period. If the absolute value is the same, it should be considered separately (by endpoint). Follow-up  
2198 data will not be handled.  $\pm\pm$

2199 3) Handling of Measured Values for Reasons Other than Tolerance Deviation

2200 Data on the timing of evaluation that may be affected by violations of the investigational product's  
2201 dosage and administration, concomitant medications, and violations of concomitant therapies, even if  
2202 the data are within the acceptable range, will be excluded from the analysis of the PPS.

2203 4) Handling of Outliers

2204 Handling of outliers shall be determined by examination prior to unblinding. Depending on the  
2205 variables, the application of statistical methods that are not significantly influenced by the appropriate  
2206 transformation or outliers should be considered and defined in the analysis plan.

2207 5) Handling of Data at Each Evaluation Time Period

2208 Except for MMRM analysis, missing data values will not be imputed for all endpoints.

2209 6) Handling of Adverse Events

2210 The number of patients with severe adverse events by severity will be summarized according to the  
2211 category of severe adverse events ("severe," "moderate," "mild").

2212 7) Handling of Discontinuation Cases

2213 Discontinuations will be censored on the day of discontinuation. However, ALSFRS-R evaluations  
2214 and investigations of concomitant drugs/therapies will be performed as much as possible until Week  
2215 16 of the Treatment period for the patients enrolled in the Treatment period, but not those who  
2216 discontinued from the Treatment period unless they refuse to continue participation in the study or  
2217 have requested to withdraw consent. In addition, if an event occurs within 28 days of the last day of  
2218 administration of the investigational product (the last day of administration of the investigational  
2219 product is day 0) in a patient who is withdrawn from the study, the efficacy data measured after the  
2220 event will be analyzed.

2221

2222 **18.2.2. Statistical Analysis Method**

2223 **18.2.2.1. Analysis of subject characteristics**

2224 Analysis items: Subject Characteristics

2225 Analysis sets: FAS, PPS, SAS

2226 Analysis method: Continuous variables and ordinal categorical variables will be classified using the  
2227 Wilcoxon rank-sum test, and continuous and categorical variables (categorical  
2228 variables) classified by aggregation will be examined for homogeneity between  
2229 treatment groups using Fisher's exact test.

2230

2231 **18.2.2.2. Treatment Status for investigational drug**

2232 Analysis items: Treatment status

2233 Analysis sets: FAS, PPS, SAS

2234 Analysis method: Summarize the number and duration of investigational drug administration,  
2235 cumulative dose, taking into account the rate of administration, presence or absence  
2236 of drug holidays, reasons for drug holidays, number of drug holidays, days off,  
2237 discontinuation, and discontinuation of study treatment.

2238 In the Continuous treatment period, the status of administration of the  
2239 investigational drug in the self-administration is also summarized.

2240

2241 **18.2.2.3. Prior and Concomitant Therapies**

2242 Analysis items: Pretreatment and concomitant treatment.

2243 Analysis sets: FAS, PPS, SAS

2244 Analysis method: Pretreatment for the underlying disease and combination therapy during the treatment  
2245 period are summarized. Pharmacotherapy will be summarized according to the  
2246 WHO-DD dictionary.

2247

2248 **18.2.2.4. Efficacy Analysis**

2249 **18.2.2.4.1. Primary Endpoint**

2250 1) Primary analysis

2251 Analysis items: Change in ALSFRS-R total score from the date of randomization to 16 weeks of the  
2252 Treatment period

2253 Analysis sets: FAS (main analysis), PPS

2254 Analysis method: The change in ALSFRS-R from the date of allocation to each time point is defined  
2255 as the response variable, and a linear model is fitted with treatment group, time  
2256 point, minimization factor, the interaction between treatment group, and time point  
2257 as a fixed effect, ALSFRS-R total score of the date of allocation as a covariate, and  
2258 covariance structure of error variance as unstructured (unstructured) (MMRM  
2259 analysis). Significance is considered significant if the lower bound of the 95%  
2260 least-squares mean confidence interval for the difference in the ALSFRS-R total  
2261 score at Week 16 of treatment when compared between the placebo and E0302 -  
2262 50 mg groups is >0. However, the ALSFRS-R total score of the dates of allocation  
2263 will be the values measured at the completion of the observation period.

2264 2) Secondary analyses

2265 Analysis items: Change from the date of allocation in the ALSFRS-R total score at Weeks 4 and 8 of  
2266 the Treatment period

2267 Analysis sets: FAS (main analysis), PPS

2268 Analysis methods: Changes in ALSFRS-R levels at Weeks 4 and 8 of treatment will be tested according  
2269 to the main analysis. Time-course graphs (including Week 16) of least squares  
2270 mean  $\pm$  SEM obtained by MMRM analysis are also plotted for each group.  
2271 Summary statistics for change from the date of allocation for each group and time  
2272 point (including worst time) will also be calculated.

2273

2274

#### **18.2.2.4.2. Secondary Endpoint**

2275

Analysis Items: Time from the date of randomization to event (permanent use of a non-invasive respiratory support device, wearing an invasive respiratory support device, or death), %FVC change, change in the concentration of homocysteine in the blood, change in MMT total score, change in grip strength (right and left), change in Norris scale total score, and change in ALSAQ 40 total score.

2276

2277

2278

2279

2280

Analysis Sets: FAS (main analysis), PPS

2281

2282

2283

2284

2285

2286

2287

2288

2289

2290

Analysis method : P values for the log-rank test will be calculated for time to event comparisons between groups. Survival curves per group will be generated by the Kaplan–Meier method, and survival rates at each time point will be calculated as appropriate, as well as standard errors according to Greenwood's formula, with corresponding 95% confidence intervals. For changes in the concentration of homocysteine in the blood, change in %FVC, change in MMT total score, change in grip strength (right and left, respectively), change in Norris scale total score, and change in ALSAQ 40 total score at each time point, tests and analyses will be performed according to the primary endpoint.

2291

#### **18.2.2.5. Safety Analysis Set**

2292

##### **18.2.2.5.1. Adverse Event**

2293

Analysis items: Subject Units, Items (SOCs according to the most recent MedDRA Glossary at Data Fixation, PT) Units Adverse Events/Reactions, Serious Adverse Events, and Adverse Events Leading to Withdrawal

2294

2295

2296

Analysis sets: SAS

2297

2298

2299

2300

2301

2302

2303

2304

2305

2306

2307

2308

2309

2310

2311

2312

2313

Analysis method: The number of patients with adverse events/adverse reactions and the number of them will be tabulated for each treatment group, and the incidence of adverse events/adverse reactions will be calculated. The data will also be tabulated by causality, severity, and severity. Fisher's exact test will be used to compare placebo and E0302 - 50 mg groups for subject-specific AE/ADR rates. The number of subjects with serious adverse events will be tabulated for each treatment group, and the incidence rate of serious adverse events and their 95% confidence interval (F distribution) will be calculated. The incidence of serious adverse events will be compared between the placebo and E0302 - 50 mg groups using Fisher's exact test. Analyses will also be conducted in which death due to worsening of symptoms associated with the progression of the underlying disease is excluded from serious adverse events.

The number of subjects with adverse events that led to discontinuation will be tabulated for each treatment group, and the incidence rate of adverse events that led to discontinuation and its 95% confidence interval (F distribution) will be calculated.

2314

##### **18.2.2.5.2. Clinical Laboratory Tests**

2315

Analysis items: Subject-by-subject, abnormal variation in item-by-item, and laboratory parameters at each evaluation time point.

2316

2317

Analysis sets: SAS

2318

2319

2320

2321

2322

2323

2324

Analysis methods: The incidence of abnormal changes will be calculated for each treatment group, and the placebo group will be compared with the E0302 - 50 mg group using Fisher's exact test.

The change from the end of the observation period (or change) will be calculated for each treatment group, and intragroup comparisons will be made using the Wilcoxon signed-rank test (for one sample). The placebo group will be compared with the E0302 - 50 mg group using the Wilcoxon rank-sum test (two samples).

2325

2326

**18.2.2.5.3. Vital signs**

2327

Analysis items: Vital Sign Items at Each Evaluation Time

2328

Analysis sets: SAS

2329

Analysis methods: The change from the end of the observation period (or change) will be calculated for each treatment group, and intragroup comparisons will be made using the Wilcoxon signed-rank test (for one sample). The placebo group will be compared with the E0302 - 50 mg group using the Wilcoxon rank-sum test (two samples).

2330

2331

2332

2333

2334

**18.2.3. Important Points of Analysis**

2335

**18.2.3.1. Adjustment Using Covariates**

2336

Multiple regression analyses will be used to evaluate the effects of background variables and potentially important prognostic factors that failed to demonstrate homogeneity between treatment groups on the primary endpoint (change in ALSFRS) of the characteristics of subjects (determined prior to unlocking) that may affect the clinical assessment of ALS. Even when the analysis is adjusted for imbalance, the results obtained from the analysis without adjusting for imbalance will be the results of the primary analysis.

2342

The impact on the primary endpoint will also be examined if patients newly initiated on riluzole during the Treatment period or whose daily dose of riluzole was changed are treated as withdrawals. Even when this analysis is performed, the results from an analysis that does not consider such discontinuations will be considered as the primary analysis.

2343

2344

2345

2346

In this study, the diagnostic criteria for ALS (updated Awaji criteria) have been changed from the diagnostic criteria (El Escorial revised Airlie House diagnostic criteria) in Phase II/III study (E0302-J081-761). Therefore, in order to confirm the effect of different diagnostic criteria on the efficacy evaluation, the effect on the primary endpoint will be investigated. The analysis will focus on the subgroups that meet the clinically definite ALS, the clinically probable ALS, and the clinically probable laboratory-supported ALS according to the El Escorial revised Airlie House diagnostic criteria at the completion of the observation period. Even in this analysis, the results from the population eligible according to the updated Awaji criteria are considered to be the primary analysis.

2347

2348

2349

2350

2351

2352

2353

Compared to the Phase II/III study (E0302-J081-761), patients with a history of administration of edaravone within four weeks prior to the observation period were eligible for participation in this study. Therefore, the effect of previous edaravone administration (presence or absence) on the primary endpoint (change in ALSFRS-R) will be examined using multiple regression analyses. Even with this adjusted analysis, the results from the unadjusted analysis will be the primary analysis.

2354

2355

2356

2357

2358

2359

2360

**18.2.3.2. Data Monitoring**

2361

Data monitoring in this study will include the subject's enrollment status and the occurrence of withdrawals from the study, as appropriate. If it is deemed necessary to revise the duration of enrollment, the duration of treatment or the target number of subjects to be enrolled on the basis of the results of the tabulation in consultation with the Medical Statistical Advisor, the Efficacy and Safety Assessment Committee should be consulted regarding the necessity of amendment of the protocol. If amendments to the protocol are recommended at the meeting of the Efficacy and Safety Assessment Committee, the protocol will be amended according to the recommendations.

2362

2363

2364

2365

2366

2367

The Medical Statistical Advisor will receive a report from the registration center of the allocation status (distribution of subject characteristics by group) with the name of the group, as appropriate. If there is an imbalance in the allocation adjustment factor (minimization factor), the change in the allocation method will be recommended to the coordinating investigator along with the response measures.

2368

2369

2370

2371

2372

2373

**18.2.3.3. Interim Analysis**

2374

Although an interim analysis will not be conducted in this study, analyses on the basis of data up to the Treatment period (at the time of application) and including the Continuous treatment period (at the completion of this study) will be performed.

2375

2376

2377  
2378  
2379  
2380  
2381  
2382  
2383  
2384  
2385  
2386  
2387  
2388  
2389  
2390  
2391  
2392  
2393  
2394  
2395  
2396  
2397  
2398  
2399  
2400  
2401  
2402  
2403  
2404  
2405  
2406  
2407  
2408  
2409  
2410  
2411  
2412  
2413  
2414  
2415  
2416  
2417  
2418  
2419  
2420  
2421  
2422  
2423  
2424

#### **18.2.3.4. Recommendations from Independent Data Monitoring Committee**

The recommendations made by the Efficacy and Safety Assessment Committee to the sponsor are as follows.

- Discontinuation or continuation due to safety
- Revision of enrollment, Treatment period, or target number of subjects enrolled

Details of the advisory review process and reasons for judgment shall not be disclosed until after disclosure. However, this does not apply to cases in which discontinuation due to safety is recommended and in which the Efficacy and Safety Evaluation Committee determines that discontinuation is warranted from the viewpoint of ensuring the safety of the subjects.

#### **18.2.3.5. Multicenter Study**

The target number of subjects in this study is 128 (64 per group). As the number of subjects per site is considered to be insufficient for the assessment of treatment-by-site interaction, independent analyses for each site will not be performed.

### **18.3. Changes to Analysis Plan and Additional Analysis**

When the person responsible for statistical analysis determines that a change or addition to the analysis plan is necessary after the initiation of the study, he/she should consider the appropriateness of the change or addition and the impact on the evaluation of the study. The history of changes or additions to the analysis plan and the results of the analysis will be recorded in the clinical study report.

## **19. QUALITY CONTROL AND QUALITY ASSURANCE OF CLINICAL STUDY**

### **19.1. Quality Control and Quality Assurance for CRF Data**

#### **1) Quality control of data**

The person responsible for data management and the person in charge must conduct quality control at each stage of data handling in accordance with separately defined SOPs to ensure the reliability and proper handling of all data related to the clinical trial.

The data management supervisor and persons in charge must conduct data management on the basis of the "Data Management Plan" etc., related to the clinical trial for the procedures until data locking, such as the collection of CRFs, inspection, input, change, and amendment of data, etc.

#### **2) Data quality assurance**

The auditor shall confirm that the quality control of the data is appropriately implemented in accordance with the Pharmaceutical GCP Ordinance, Standard Operating Procedures, and this protocol, etc.

### **19.2. Quality Control**

The monitors designated by the coordinating investigator will confirm that the clinical trial is conducted appropriately at the participating medical organization in compliance with the protocol and the GCP Ministerial Ordinance through monitoring, etc. In addition, The source documents and other clinical trial-related records should be directly inspected to ensure the accuracy of the records, such as the CRF.

In the event of any discrepancies with the source documents, consistency of the entries, or logical discrepancies, the investigator should review the validity of the section and correct the CRF as needed.

Monitors will conduct monitoring by site visits, telephone, email, and writing, in accordance with the "Monitoring Procedures" pertaining to the study.



2425 **19.3. Quality Assurance**

2426 **19.3.1. Audit**

2427 The auditor appointed by the coordinating investigator evaluates whether the conduct of the study, data  
2428 preparation, documentation (recording), and reporting is conducted in compliance with the GCP  
2429 Ordinance and related laws, protocols, and SOPs independently of and separately from normal  
2430 monitoring and quality control activities of the study.

2431 The auditor shall conduct an audit from the standpoint of a third party as part of the quality assurance  
2432 activities in accordance with the Audit Plan and the Audit Procedures for the clinical trial concerned.

2433  
2434

2435 **20. RETENTION OF RECORDS**

2436 **20.1. Study Institutions**

2437 The head of the medical institution shall store the documents to be stored as stipulated in the GCP  
2438 Ordinance at the participating medical organization.

2439 The storage period of materials is 1. Or 2. Either day is delayed.

2440 ① Date of marketing approval for the investigational product (3 years after the date of notification  
2441 that the discontinuation of development or the results of the clinical trial are not attached to the  
2442 application for approval)

2443 ② Three years after discontinuation or completion of the clinical trial

2444 If the investigator considers that it is unnecessary to store the relevant documents, he/she will notify  
2445 the head of the medical institution accordingly.

2446

2447 **20.2. The organizer of the Institutional Review Board**

2448 The person who establishes the Institutional Review Board shall store the documents to be stored as  
2449 specified by the Ministerial Ordinance on GCP by the Institutional Review Board.

2450 The storage period of materials is 1. Or 2. Either day is delayed.

2451 ① Date of marketing approval for the investigational product (3 years after the date of notification  
2452 that the discontinuation of development or the results of the clinical trial are not attached to the  
2453 application for approval)

2454 ② Three years after discontinuation or completion of the clinical trial

2455 If the investigator considers that it is unnecessary to store the relevant documents, he/she will notify  
2456 the person who established the Institutional Review Board accordingly.

2457

2458 **20.3. Head of Study Institution**

2459 The principal investigator shall store the documents to be stored as stipulated in the GCP Ordinance by  
2460 the principal investigator. The storage location and period of materials shall be in accordance with the  
2461 "Procedures for Storage of Records."

2462

2463 **20.4. Investigator**

2464 The coordinating investigator shall store the documents to be stored by the coordinating investigator.  
2465 The storage location and period of materials shall be in accordance with the "Procedures for Storage of  
2466 Records."

2467

2468

2469 **21. ETHICS**

2470 **21.1. Institutional Review Board**

2471 **21.1.1. Review of Study Conduct**

2472 The Institutional Review Board will review the protocol, the CRF, the content of the informed consent  
2473 form to patients, and the appropriateness of the conduct and continuation of the study from an ethical,  
2474 scientific, and medical perspective.

2475

## 2476 **21.2. Ethical Conduct of Clinical Study**

### 2477 **21.2.1. GCP Compliance**

2478 In conducting this clinical trial, the protection of human rights of the subjects shall be given utmost  
2479 priority in accordance with the protocol, "Standards for Implementation of Clinical Trials on Drugs  
2480 (GCP)" (including amendments dated March 27, 1997) stipulated in Article 14, Paragraphs 3 and 80-2 of  
2481 the Law Concerning the Security of Quality, Efficacy, and Safety of Drugs and Medical Devices, etc. and  
2482 in accordance with the Declaration of Helsinki.

2483

### 2484 **21.2.2. Protection of Human Rights**

2485 In selecting the subjects, the principal investigator and the sub-investigator will carefully review the  
2486 appropriateness of requesting their participation in the clinical trial, considering the health status of the  
2487 subjects, symptoms, age, sex, ability to provide consent, relationship with the principal investigator, and  
2488 whether they participate in the clinical trial, on the basis of the perspective of protecting human rights and  
2489 the inclusion and exclusion criteria.

2490

### 2491 **21.2.3. Protection of privacy**

2492 When the principal investigator and the sub-investigator provide the CRF, etc., outside the relevant  
2493 medical institution, they attach a subject identification code and use it. Information (name, address,  
2494 telephone number, etc.) that can identify the subjects will not be entered by persons outside the medical  
2495 institution.

2496 When data centers, etc. refer to medical institutions, the identification of subjects will be performed  
2497 using the subject identification code managed by the principal investigator and the sub-investigator, or  
2498 the registration number issued by the data center, etc.

2499 When publishing the results of the clinical trial, the investigator or sub-investigator should give full  
2500 consideration to protecting subjects' names, privacy, diseases, etc., and personal information.

2501

2502

## 2503 **22. STUDY COST AND COMPENSATION/INDEMNITY OF HEALTH** 2504 **INJURY**

### 2505 **22.1. Disclosure and Confidentiality**

2506 The investigator or sub-investigator shall not have any personal relationships with the supplier of the  
2507 investigational product used in this clinical trial, such as employment relationships with relatives. These  
2508 interests in the study will be reviewed and approved by the Institutional Review Board at the participating  
2509 medical organization in which the principal investigator is employed.

2510 This clinical trial is adopted in "Research Project for Practical Application of Intractable Diseases" of  
2511 the National Research and Development Corporation of Japan (AMED) and performed in part using  
2512 public research funds. Investigational products will be provided free of charge by the supplier of the  
2513 investigational product. The supplier will not influence the results of this study. This trial will also be  
2514 funded by Eisai Co., Ltd. from April 2020 onwards. The investigator or sub-investigator will not distort  
2515 his/her professional judgment in the conduct or reporting of the study for financial or other personal  
2516 benefits. Clinical trials are conducted fairly, and the interests of the manufacturers of products and drugs  
2517 used in clinical trials are appropriately managed in accordance with the Conflict of Interest Rules of the  
2518 participating medical organizations.

2519

### 2520 **22.2. Study Cost**

2521 Since this clinical trial applies the non-insurance combined medical care expense system, the health  
2522 insurance of the examinee is adapted under this system except for the cost related to the administration of  
2523 the investigational drug. The investigational product will be provided free of charge by the supplier of the  
2524 investigational product, and the expenses related to the administration of the investigational product will

2525 be paid through research funds. In addition, measurements of the concentration of homocysteine in the  
2526 blood and pregnancy tests are paid through research funds.

2527 When paying the clinical trial cooperative expenses, expenses for reducing the burden, etc., to the  
2528 subjects, these shall be paid in accordance with the provisions of each participating medical organization.  
2529

### 2530 **22.3. Compensation/Indemnity of Study-related Health Injury**

2531 1) The head of the medical institution shall provide medical treatment related to the treatment of health  
2532 damage (adverse reactions, etc.) caused by the subject in connection with the clinical trial and take  
2533 other necessary measures.

2534 2) Compensation will be paid for death or disability covered by compensation in accordance with the  
2535 provisions of the contracted clinical trial insurance.

2536 3) No compensation will be provided for any of the health hazards shown in this section if they are  
2537 denied to be related to this study, if they are caused by the subject's intentional or gross negligence,  
2538 or if they are caused by a failure of efficacy (the investigational drug was ineffective).  
2539  
2540

## 2541 **23. TRIAL REGISTRATION, ATTRIBUTION, AND PUBLICATION OF** 2542 **RESULTS**

### 2543 **23.1. Clinical Trial Registry**

2544 This clinical trial is registered in one of the clinical trial registration systems, Clinical Trial gov., etc.,  
2545 of the Clinical Trial Registration System of the Japan Medical Association, Japic CTI, and UMIN.  
2546

### 2547 **23.2. Agreement on Attribution and Publication of Results**

2548 The results obtained from this clinical trial shall belong to each participating medical organization.  
2549 Eisai Co., Ltd., the supplier of investigational products, shall be entitled to use the investigational drug  
2550 for the purpose of applying for marketing approval.

2551 In addition, the principal investigator and the coordinating investigator will consult with the supplier  
2552 of the investigational product in advance and select the appropriate international/national conference or  
2553 peer-reviewed journal for the publication of the study results in various forms (abstracts/posters,  
2554 presentations, articles, etc.).  
2555  
2556

## 2557 **24. STUDY ADMINISTRATIVE STRUCTURE**

2558 Described in Appendix 1.  
2559  
2560

## 2561 **25. REFERENCES**

2562 (1) Rosen DR et al. Mutations in Cu/Zn superoxide dismutase gene are associated with familial  
2563 amyotrophic lateral sclerosis. *Nature*. 362: 59-62. 1993

2564 (2) Wakafumi Mori et al. Diagnostic criteria, disease type classification, and severity of motor neuron  
2565 disease. *Internal medicine*. 95: 1551-1555. 2005

2566 (3) Intractable Diseases Information Center Home Page: <http://www.nanbyou.or.jp/>

2567 (4) Investigation Committee for New Drug Report No. 3 (August 10, 1998) Riluzole

2568 (5) First Committee on Drug Reports (June 11, 2017) Edaravone

2569 (6) Kikuchi M et al. Protective Effects of Methylcobalamin, a Vitamin B12 Analog, Against  
2570 Glutamate-induced Neurotoxicity in Retinal Cell Culture. *Invest Ophthalmol Vis Sci*. 38: 848-54.  
2571 1997

2572 (7) Akaike A et al. Protective effects of a vitamin B12 analog, methylcobalamin, against glutamate  
2573 cytotoxicity in cultured cortical neurons. *European Journal of Pharmacology*. 241: 1-6. 1993

2574 (8) Watanabe T et al. Ultra-high dose methylcobalamin promotes nerve regeneration in experimental

- 2575 acrylamide neuropathy. *Journal of the Neurological Sciences*. 122: 140-143. 1994
- 2576 (9) Yamazaki K et al. Methylcobalamin (Methyl-B12) Promotes Regeneration of Motor Nerve  
2577 Terminals Degenerating in Anterior Gracile Muscle of Gracile Axonal Dystrophy (GAD) Mutant  
2578 Mouse. *Neurosci Lett*. 170: 195-197. 1994
- 2579 (10) Kaji R et al. Effect of ultrahigh-dose methylcobalamin on compound muscle action potentials in  
2580 amyotrophic lateral sclerosis: a double-blind controlled study. *Muscle Nerve*. 21: 1775-1778. 1998
- 2581 (11) Izumi et al. High-dose methylcobalamin therapy for ALS. *History of Medicine*. 205: 142-144.  
2582 2003
- 2583 (12) Kazumi Otsushin and Ryuji Kaji. High-dose methylcobalamin therapy for ALS. *Brain and Nerve*.  
2584 59: 1141-1147. 2007
- 2585 (13) Geevasinga N. et al. Awaji criteria improve the diagnostic sensitivity in amyotrophic lateral  
2586 sclerosis: A systematic review using individual patient data. *Clinical Neurophysiology*. 127: 2684-  
2587 2691. 2016
- 2588 (14) Edited by the Japanese Society of Neurology. Amyotrophic Lateral Sclerosis Practice Guideline  
2589 2013, '2. Diagnosis, Differential Diagnosis, and Testing. NANKODO23-43. 2013
- 2590 (15) De Carvalho M et al. Electrodiagnostic criteria for diagnosis of ALS. *Clin Neurophysiol*. 119: 497-  
2591 503. 2008
- 2592 (16) World Federation of Neurology, Research Group on Motor Neuron Diseases Consensus Guidelines  
2593 for the design and Implementation of Clinical Trials in ALS. 2nd Airlie House Workshop 1998
- 2594 (17) Japanese Society of Neurology Treatment Guidelines for ALS 2002. *Clinical Neurology*. 42 (7):  
2595 678-719. 2002
- 2596 (18) Kollewe K et al. ALSFRS-R score and its ratio: A useful predictor for ALS-progression. *J Neurol*.  
2597 275: 69-73. 2008
- 2598 (19) Ohashi T. et al. Examination of the Japanese Revised ALS Functional Rating Scale of the  
2599 Functional Rating Scale in Daily Activities of Amyotrophic Lateral Sclerosis (ALS) Patients.  
2600 *Cranial nerves*. 53: 346-355. 2001
- 2601 (20) Zoccollella S, Bendotti C, Beghi E, Logroscino G. Homocysteine levels and amyotrophic lateral  
2602 sclerosis: A possible link. *Amyotroph Lateral Scler*. 11: 140-147. 2010
- 2603 (21) World Federation of Neurology, Research Group on Motor Neuron Diseases, Subcommittee on  
2604 Motor Neuron Disease, Guidelines for the use and performance of quantitative outcome measures  
2605 in ALS clinical trials 1995.
- 2606 (22) Hideyo Oda, Yasuo Ohashi, Kunio Tashiro, Mizuno, Kazuyuki Furuko, and Nobuo Yanagisawa.  
2607 Reliability and factor structure of the Physical Function Rating Scale of ALS patients. *Cranial*  
2608 *nerves*. 48 (11): 999-1007. 1996
- 2609 (23) Yamaguchi Takuyo, Taisho Definition, Saito Manashi, Yuichi Itoh, Wakabumi Mori, Kunio  
2610 Tashiro, et al. ALS-Specific Quality of Life Scale ALSAQ-40 Japanese Version-Its Validity and  
2611 Clinical Applications-Brain and nerves. 56 (6): 483-94. 2004

## 26. APPENDIX

### 26.1. List of Appendix

- 2615 Appendix 1: Structure of implementation of the study
- 2616 Appendix 2: List of drugs prohibited from concomitant use/treatment prohibited from concomitant use
- 2617 Appendix 3: Inclusion criteria for abnormal laboratory values and blood pressure and pulse rate
- 2618 Appendix 4: Criteria for Classification of Seriousness of Adverse Drug Reactions
- 2619 Appendix 5: MMT test sheet
- 2620 Appendix 6: Norris Scale Worksheet
- 2621 Appendix 7: ALSAQ 40 Questionnaire

### 26.2. Appendix 1: Structure of implementation of the study

| Principle investigators | Affiliations                                           |
|-------------------------|--------------------------------------------------------|
| Hiroyuki Nodera         | Department of Neurology, Tokushima University Hospital |

|                                                                                                               |                                                                                                                                                                                                                                                                                                                                                                        |
|---------------------------------------------------------------------------------------------------------------|------------------------------------------------------------------------------------------------------------------------------------------------------------------------------------------------------------------------------------------------------------------------------------------------------------------------------------------------------------------------|
| (From the start of the trial to 27 Feb 2019)<br>Koji Fujita<br>(From 27 Feb 2019 to present)                  | Address: 2-50-1 Kuramoto cho, Tokushima city,<br>Tokushima 770-8503, Japan<br>TEL: 81-88-631-3111                                                                                                                                                                                                                                                                      |
| Koji Abe                                                                                                      | Department of Neurology, Okayama University Hospital<br>Address: 2-5-1 Shikata cho, Kita ku, Okayama city,<br>Okayama 700-8558, Japan<br>TEL:81 86 223 7151                                                                                                                                                                                                            |
| Satoshi Kuwabara                                                                                              | Department of Neurology, Chiba University Hospital<br>Address: 1-8-1 Inohana, Chuo ku, Chiba city, Chiba 260-<br>8677, Japan<br>TEL: 81-43-222-7171                                                                                                                                                                                                                    |
| Masahiro Sonoo                                                                                                | Department of Neurology, Teikyo University Hospital<br>Address: 2-11-1 Kaga, Itabasi ku, Tokyo 173-8606, Japan<br>TEL: 81-3-3964-1211                                                                                                                                                                                                                                  |
| Kazuaki Kanai<br>(From the start of the trial to 3 Jul 2018)<br>Taiji Tsunemi<br>(From 4 Jul 2018 to present) | Department of Neurology, Juntendo University Hospital<br>Address: 3-1-3 Hongo, Bunkyo ku, Tokyo 113-8431, Japan<br>TEL: 81-3-3813-3111                                                                                                                                                                                                                                 |
| Ken Ikeda                                                                                                     | Department of Neurology, Toho University Omori Medical<br>Center<br>Address: 6-11-1 Omorinishi, Ota ku, Tokyo 143-8541,<br>Japan<br>TEL: 81-3-3762-4151                                                                                                                                                                                                                |
| Toshio Shimizu                                                                                                | Department of Neurology, Tokyo Metropolitan<br>Neurological Hospital<br>Address: 2-6-1 Musashidai, Fuchu City, Tokyo 183-0042,<br>Japan<br>EL: 81-42-323-5110                                                                                                                                                                                                          |
| Makiko Nagai                                                                                                  | Department of Neurology, Kitasato University East<br>Hospital<br>Address: 2-1-1 Asamizodai, Minami ku, Sagamigara city,<br>Kanagawa 252-0380, Japan<br>TEL: 81-42-748-9111<br>(From )<br>Department of Neurology, Kitasato University Hospital<br>Address: 1-15-1 Kiotasato, Minami ku, Sagamigara city,<br>Kanagawa 252-0375, Japan<br>TEL: 81-42-748-8111<br>(From ) |
| Shun Shimohama                                                                                                | Department of Neurology, Sapporo Medical University<br>Hospital<br>Address: S1W17, Chuo ku, Sapporo city, Hokkaido 060-<br>8543, Japan<br>TEL: 81-42-748-9111                                                                                                                                                                                                          |
| Hidefumi Ito                                                                                                  | Department of Neurology, Wakayama Medical University<br>Hospital<br>Address: 811-1 Kimiidera, Wakayama city, Wakayama<br>641-8509, Japan<br>TEL: 81-73-447-2300                                                                                                                                                                                                        |
| Kiyonobu Komai                                                                                                | Department of Neurology, National Hospital Organization<br>Iou Hospital                                                                                                                                                                                                                                                                                                |

|                                                                                                                                      |                                                                                                                                                                                 |
|--------------------------------------------------------------------------------------------------------------------------------------|---------------------------------------------------------------------------------------------------------------------------------------------------------------------------------|
|                                                                                                                                      | Address: 73-1 Ni, Iwade machi, Kanazawa city, Ishikawa 920-0192, Japan<br>TEL: 81-76-258-1180                                                                                   |
| Hitoshi Kikuchi                                                                                                                      | Department of Neurology, Murakami Karindo Hospital<br>Address: 2-14-45 Togire, Nishi ku, Fukuoka city, Fukuoka 819-8585, Japan<br>TEL: 81-92-811-3331                           |
| Nobuo Kohara                                                                                                                         | Department of Neurology, Kobe City Medical Centre General Hospital<br>Address: 2-1-1 Minatojimaminami machi, Chuo ku, Kobe city, Hyogo 650-0047, Japan<br>TEL: 81-78-302-4321   |
| Makoto Urushitani                                                                                                                    | Department of Neurology, Shiga University of Medical Science Hospital<br>Address: Setatsukinowa Cho, Otsu city, Shiga 520-2192, Japan<br>Address: 077-548-2111                  |
| Naoki Atsuta<br>(From to 19 Oct 2020)<br>Yohei Iguchi<br>(From 20 Oct 2020 to present)                                               | Department of Neurology, Nagoya University Hospital<br>Address: 65 Tsurumai Cho, Showa ku, Nagoya city, Aichi 466-8560, Japan<br>TEL: 81-52-741-2111                            |
| Masaya Oda                                                                                                                           | Department of Neurology, Vihara Hananosato Hospital<br>Address: 4-3-10 Tokaichihigashi, Miyoshi City, Hiroshima 728-0013, Japan<br>TEL: 81-824-63-0330                          |
| Kazuyuki Noda                                                                                                                        | Department of Neurology, Juntendo University Shizuoka Hospital<br>Address: 1129 Nagaoka, Izunokuni city, Shizuoka 410-2295, Japan<br>TEL: 81-55-948-3111                        |
| Kazuto Nishinaka                                                                                                                     | Department of Neurology, Sumitomo Hospital<br>Address: 5-3-20 Nakanoshima, Kita ku, Osaka city, Osaka 530-0005<br>TEL: 81-6-6443-1261                                           |
| Yasuhiro Kojima                                                                                                                      | Department of Neurology, Takeda General Hospital<br>Address: 28-1 Ishimamoriminami Cho, Fushimi ku, Kyoto city, Kyoto 601-1495, Japan<br>TEL : 81-75-572-6331                   |
| Daisuke Kuzume                                                                                                                       | Department of Neurology, Chikamori Hospital<br>Address: 1-1-16 Okawasuji, Kochi city, Kochi 780-8522<br>TEL: 81-88-822-5231                                                     |
| Tomohiko Ishihara                                                                                                                    | Department of Neurology, Niigata University Medical & Dental Hospital<br>Address: 1-754 Asahimachiidori, Chuo ku, Niigata city, Niigata 951-8520, Japan<br>TEL : 81-25-223-6161 |
| Sagiri Isole<br>(From the start of the trial to 5 Feb 2019)<br>Nobuyuki Araki<br>(From 6 Feb 2019 to 26 Dec 2019)<br>Takahiro Takeda | Department of Neurology, National Hospital Organization Chiba-East Hospital<br>Address: 673 Nitona Cho, Chuo ku, Chiba city, Chiba 260-0801, Japan<br>TEL: 81-043-261-5171      |

|                              |                                                                                                                                                             |
|------------------------------|-------------------------------------------------------------------------------------------------------------------------------------------------------------|
| (From 6 Feb 2019 to present) |                                                                                                                                                             |
| Mitsuya Morita               | The rehabilitation center, Jichi Medical University Hospital<br>Address: 3311-1 Yakushiji, Shimotsuke city, Tochigi 329-0431, Japan<br>TEL: 81-285-44-2111  |
| Takayoshi Shimohata          | Department of Neurology, Gifu University Hospital<br>Address: 1-1 Yanagito, Gifu city, Gifu 501-1194<br>TEL: 81-58-230-6000                                 |
| Kazuaki Kanai                | Department of Neurology, Fukushima Medical University Hospital<br>Address: 1 Higarigaoka, Fukushima city, Fukushima 960-1295, Japan<br>TEL : 81-24-547-1111 |

2624  
2625  
2626  
2627

### 26.3. Appendix 2: List of Drugs Prohibited from Concomitant Use/Treatment Prohibited from Concomitant Use

| Drugs containing vitamin B12 as the main component                                                                                                                                                                                                                         | Date of addition                                       |
|----------------------------------------------------------------------------------------------------------------------------------------------------------------------------------------------------------------------------------------------------------------------------|--------------------------------------------------------|
| Methylcobalamin<br>Cobamamide<br>Hydroxocobalamin<br>Cyanocobalamin                                                                                                                                                                                                        |                                                        |
| Drugs considered to have potential efficacy in ALS                                                                                                                                                                                                                         |                                                        |
| Minocycline<br>Edaravone<br>IGF-I (Insulin-like Growth Factor-1)<br>Dextromethorphan hydrobromide-Quinidine sulfate<br>Tamoxifen<br>Thalidomide<br>Sodium phenylbutyrate<br>Meloxicam<br>Coenzyme Q10<br>Arimoclomol<br>Perampanel<br>Bosutinib<br>Ropinirole<br>Ibudilast | 30 Oct 2017<br>6 Nov 2018<br>6 Nov 2018<br>24 Apr 2019 |
| Therapy considered to have potential efficacy in ALS                                                                                                                                                                                                                       |                                                        |
| Hybrid Assistive Limb (Lower Limb Type)                                                                                                                                                                                                                                    | 4 Jul 2018                                             |

2628  
2629  
2630  
2631  
2632  
2633  
2634

### 26.4. Appendix 3: Inclusion Criteria for Abnormal Laboratory Values and Blood Pressure and Pulse Rate

The decision will be made by the safety evaluator with reference to the following, taking into account the subject's underlying disease, complications, etc.

| Clinical Test items | Criterion |
|---------------------|-----------|
|---------------------|-----------|

| <b>Complete Blood Count<sup>*1</sup></b>                                                                                               |                                                                                                                                                                                                                                                                                                                                                                                                                                     |
|----------------------------------------------------------------------------------------------------------------------------------------|-------------------------------------------------------------------------------------------------------------------------------------------------------------------------------------------------------------------------------------------------------------------------------------------------------------------------------------------------------------------------------------------------------------------------------------|
| White blood cell count                                                                                                                 | <3,000 /mm <sup>3</sup><br>The case of increase is not considered an adverse event unless there are special circumstances. Neutropenia (<1,500 /mm <sup>3</sup> ) and lymphopenia (<800 /mm <sup>3</sup> ) may be taken as adverse events.                                                                                                                                                                                          |
| Red blood cell count                                                                                                                   | Male: <350×10 <sup>4</sup> /mm <sup>3</sup> , Female: <320×10 <sup>4</sup> /mm <sup>3</sup>                                                                                                                                                                                                                                                                                                                                         |
| Hemoglobin                                                                                                                             | <10 g/dL                                                                                                                                                                                                                                                                                                                                                                                                                            |
| Hematocrit value                                                                                                                       | Male: <35 %, Female: <30 %                                                                                                                                                                                                                                                                                                                                                                                                          |
| Platelet count                                                                                                                         | Decrease: <7.5×10 <sup>4</sup> /mm <sup>3</sup><br>Increase: ≥60×10 <sup>4</sup> /mm <sup>3</sup> with any symptoms, or ≥100×10 <sup>4</sup> /mm <sup>3</sup>                                                                                                                                                                                                                                                                       |
| <b>Blood Biochemical Examination</b>                                                                                                   |                                                                                                                                                                                                                                                                                                                                                                                                                                     |
| AST(GOT) <sup>*1</sup><br>ALT(GPT) <sup>*1</sup><br>γ-GTP <sup>*1</sup><br>ALP <sup>*1</sup><br>LDH <sup>*1</sup><br>CPK <sup>*1</sup> | >2.5 times of the upper limit of the facility standard value<br>The following examples may be considered as adverse events even if they do not exceed 2.5 times.<br>• The contribution of the investigational drug is considered to be significant based on the range of variation.<br>• An elevated trend is observed during the study, and the patient recovers when the effect of the investigational drug is no longer present. |
| Albumin <sup>*4</sup>                                                                                                                  | <2 g/dL                                                                                                                                                                                                                                                                                                                                                                                                                             |
| T-Bil <sup>*1</sup><br>Cre <sup>*1</sup><br>Bun <sup>*1</sup>                                                                          | >1.5 times of the upper limit of the facility standard value                                                                                                                                                                                                                                                                                                                                                                        |
| Na <sup>*1</sup>                                                                                                                       | Decrease: ≤125 mEq/L, Increase: ≥155 mEq/L                                                                                                                                                                                                                                                                                                                                                                                          |
| K <sup>*1</sup>                                                                                                                        | Decrease: ≤3.2 mEq/L, Increase: ≥5.5 mEq/L                                                                                                                                                                                                                                                                                                                                                                                          |
| Cl <sup>*1</sup>                                                                                                                       | Decrease: ≤96 mEq/L, Increase: ≥115 mEq/L                                                                                                                                                                                                                                                                                                                                                                                           |
| TP                                                                                                                                     | --                                                                                                                                                                                                                                                                                                                                                                                                                                  |
| TG <sup>*4</sup>                                                                                                                       | ≥500 mg/dL                                                                                                                                                                                                                                                                                                                                                                                                                          |
| T-cho <sup>*4</sup>                                                                                                                    | ≥400 mg/dL                                                                                                                                                                                                                                                                                                                                                                                                                          |
| <b>Urine Examination</b>                                                                                                               |                                                                                                                                                                                                                                                                                                                                                                                                                                     |
| Urine sugar <sup>*1</sup><br>Urine protein <sup>*1</sup>                                                                               | Two or more levels of variation (If the qualitative value includes ±, ± shall also be one level.)                                                                                                                                                                                                                                                                                                                                   |
| Urine urobilinogen                                                                                                                     | --                                                                                                                                                                                                                                                                                                                                                                                                                                  |
| <b>Blood Pressure</b>                                                                                                                  |                                                                                                                                                                                                                                                                                                                                                                                                                                     |
| Hypertension <sup>*2</sup>                                                                                                             | Systolic blood pressure: ≥140 mmHg or Diastolic blood pressure: ≥90 mmHg                                                                                                                                                                                                                                                                                                                                                            |
| Hypotension <sup>*3</sup>                                                                                                              | Systolic blood pressure: <90 mmHg                                                                                                                                                                                                                                                                                                                                                                                                   |
| Pulse Rate <sup>*3</sup>                                                                                                               | ≥100 bpm or <50 bpm                                                                                                                                                                                                                                                                                                                                                                                                                 |

2635  
2636  
2637  
2638  
2639  
2640  
2641  
2642  
2643  
2644  
2645

**Reference:**

- \*1: Japan Society of Chemotherapy, Antimicrobial Safety Evaluation Standard Review Committee, Final Report "Safety Evaluation Criteria for Antimicrobial Agents." Japanese Journal of Chemotherapy. JULY 2010; Vol.58, No.4: p484-493.  
\*2: The Japanese Society of Hypertension. "Hypertension Treatment Guidelines 2014".  
\*3: Ministry of Health, Labour and Welfare. "Criteria for Classifying the Severity of Adverse Reactions to Medicinal Products (June 29, 1992) Pharmaceutical Affairs Bill No. 80".  
\*4: "Common Terminology Criteria for Adverse Events (CTCAE) version 4.0, Japanese Translation (JCOG ver)".



**26.5. Appendix 4: Criteria for Classification of Seriousness of Adverse Drug Reactions**

Criteria for classification of the seriousness of adverse drug reactions follow the statement “Criteria for Classification of Seriousness of Adverse Drug Reactions” prepared by the Ministry of Health, Labour and Welfare.

**26.5.1. General remarks**

This criterion is based on the classification of the severity of adverse drug reactions into three grades, as follows.

Grade 1: Considered minor side effects.

Grade 2: Not a serious side effect, but not a minor one either.

Grade 3: Considered to be serious side effects. In other words, there is a risk of death or permanent dysfunction to the extent that it interferes with daily life.

**26.5.2. Liver**

| Side effects grade | Grade 1                            | Grade 2                                                      | Grade 3                                                                                                       |
|--------------------|------------------------------------|--------------------------------------------------------------|---------------------------------------------------------------------------------------------------------------|
| T-Bil (mg/dL)      | ≥1.6 and <3.0                      | ≥3.0 and <10                                                 | ≥10                                                                                                           |
| GOT, GPT (U)       | ≥1.25×N and <2.5×N<br>≥50 and <100 | ≥2.5×N and <12×N<br>≥100 and <500                            | ≥12×N<br>≥500                                                                                                 |
| ALP                | ≥1.25×N and <2.5×N                 | ≥2.5×N and <5×N                                              | ≥5×N                                                                                                          |
| γ-GTP              | ≥1.5×N                             | -                                                            | -                                                                                                             |
| LDH                | ≥1.5×N                             | -                                                            | -                                                                                                             |
| PT                 | -                                  | -                                                            | ≤40%                                                                                                          |
| Other symptoms     | -                                  | Icterus<br>Hepatomegaly<br>Right hypochondria<br>Fatty liver | Hemorrhagic diathesis<br>Liver failure<br>Hepatic cirrhosis<br>Hepatophyma<br>Icterus lasting over six months |

**26.5.3. Kidney**

| Side effects grade      | Grade 1        | Grade 2                               | Grade 3                                                                                          |
|-------------------------|----------------|---------------------------------------|--------------------------------------------------------------------------------------------------|
| BUN (mg/dL)             | ≥1 × N and <25 | ≥25 and <40                           | ≥40                                                                                              |
| Creatinine (mg/dL)      | ≥1 × N and <2  | ≥2 and <4                             | ≥4                                                                                               |
| Proteinuria             | 1+             | 2+ or 3+                              | >3+                                                                                              |
| Hematuria               | Microscopic    | Gross                                 | Gross and coagulate                                                                              |
| Urine volume            | -              | ≤500ml/24h or oliguria<br>or polyuria | ≤500ml/24h or<br>anuria                                                                          |
| Serum potassium (mEq/L) | -              | ≥5.0 and <5.5                         | ≥5.5                                                                                             |
| Other symptoms          | -              | -                                     | Nephrotic syndrome<br>Acute kidney failure<br>Chronic kidney failure<br>Uremia<br>Hydronephrosis |

**26.5.4. Blood**

| Side effects grade    | Grade 1                                       | Grade 2                                       | Grade 3                                                 |
|-----------------------|-----------------------------------------------|-----------------------------------------------|---------------------------------------------------------|
| Red blood cell        | $<350 \times 10^4$ and $\geq 300 \times 10^4$ | $<300 \times 10^4$ and $\geq 250 \times 10^4$ | $<250 \times 10^4$                                      |
| Hb (g/dL)             | $<11$ and $\geq 9.5$                          | $<9.5$ and $\geq 8$                           | $<8$                                                    |
| White blood cell      | $<4,000$ and $\geq 3,000$                     | $<3,000$ and $\geq 2,000$                     | $<2,000$                                                |
| Granulocyte           | $<2,000$ and $\geq 1,500$                     | $<1,500$ and $\geq 1,000$                     | $<1,000$                                                |
| Platelet              | $<100,000$ and $\geq 75,000$                  | $<75,000$ and $\geq 50,000$                   | $<50,000$                                               |
| Hemorrhagic diathesis | Mild bleeding                                 | Moderate bleeding                             | Severe bleeding                                         |
| Other symptoms        | -                                             | -                                             | Pancytopenia<br>Pure red cell anemia<br>Agranulocytosis |

2668  
2669  
2670

### 26.5.5. Allergy symptom

| Side effects grade                  | Grade 1                                                           | Grade 2                | Grade 3                                                                                                                                                  |
|-------------------------------------|-------------------------------------------------------------------|------------------------|----------------------------------------------------------------------------------------------------------------------------------------------------------|
| Cutaneous symptom                   | Local skin rash                                                   | Widespread skin rash   | Muco - cutaneo -<br>ocular syndrome<br>TEN<br>Erythroderma<br>Weber-Christian<br>disease<br>SLE like symptom<br>Scleroderma<br>Pemphigus like<br>symptom |
|                                     | Photodermatitis, Fixed eruption, Ulceration,<br>Pigmentation, etc |                        |                                                                                                                                                          |
| Constitutional symptom (Fever)      | Fever                                                             |                        | -                                                                                                                                                        |
| Constitutional symptom (Allergy)    | -                                                                 | -                      | Shock<br>Anaphylaxis like<br>symptom                                                                                                                     |
|                                     | Angioedema                                                        |                        | Laryngeal edema                                                                                                                                          |
| Constitutional symptom (vasculitis) | -                                                                 | Hypersensitive angitis |                                                                                                                                                          |
| Local symptom                       | Arthralgia, Lymphadenopathy                                       |                        | -                                                                                                                                                        |

2671  
2672  
2673

### 26.5.6. Respiratory symptom

| Side effects grade                  | Grade 1                                          | Grade 2                                                                      | Grade 3                                                                                                                                                       |
|-------------------------------------|--------------------------------------------------|------------------------------------------------------------------------------|---------------------------------------------------------------------------------------------------------------------------------------------------------------|
| Dyspnea                             | Short breath<br>Grade 2 by H-J<br>classification | Exertional dyspnea<br>Grade 3 or 4 by H-J<br>classification                  | Rest dyspnea<br>Grade 5 by H-J<br>classification                                                                                                              |
| Impairment of<br>respiratory rhythm | -                                                | Transient<br>hyperventilation<br>Sleep apnea without<br>symptom or hypoxemia | Respiratory arrest<br>Respiratory depression<br>Continuous<br>hyperventilation<br>Cheyne-Stokes<br>respiration<br>Sleep apnea with<br>symptom or<br>hypoxemia |

|                                      |                                                                                                              |                                    |                                                                                                                                                                                                                                                               |
|--------------------------------------|--------------------------------------------------------------------------------------------------------------|------------------------------------|---------------------------------------------------------------------------------------------------------------------------------------------------------------------------------------------------------------------------------------------------------------|
| PaO <sub>2</sub>                     | <70 and ≥60                                                                                                  | <60 and ≥50                        | <50<br>Decrease of 20 or more<br>in comparison with<br>those before<br>administration                                                                                                                                                                         |
| PaCO <sub>2</sub>                    | -                                                                                                            | -                                  | ≥50 (Hypoventilation)<br>≤30 (Hyperventilation)                                                                                                                                                                                                               |
| %FVC<br>% in 1 second                | -                                                                                                            | <70 % and ≥50 %<br><70 % and ≥50 % | ≤50 %<br>≤50 %                                                                                                                                                                                                                                                |
| Chest X-ray<br>(Consolidation)       | -                                                                                                            | Less than 1/3 of one<br>lung       | More than 1/3 of one<br>lung                                                                                                                                                                                                                                  |
| Chest X-ray<br>(Interstitial shadow) | -                                                                                                            | -                                  | Diffuse interstitial<br>shadow                                                                                                                                                                                                                                |
| Chest X-ray<br>(Pleural effusion)    | -                                                                                                            | Less than 1/3 of one<br>lung       | More than 1/3 of one<br>lung                                                                                                                                                                                                                                  |
| Asthmatic attack                     | -                                                                                                            | Minor asthma attack                | Moderate and Severe<br>asthma attack                                                                                                                                                                                                                          |
| Hemoptysis                           | -                                                                                                            | Hemosputum                         | Hemoptysis                                                                                                                                                                                                                                                    |
| Other symptoms                       | Hiccup, Yawning,<br>Hoarseness, Sneezing,<br>Nasal obstruction,<br>Cough, Sputum, Sore<br>throat, Chest pain | -                                  | ARDS, Interstitial<br>pneumonia, PIE<br>syndrome, Pulmonary<br>cirrhosis,<br>Hypersensitivity<br>pneumonia, Pulmonary<br>edema, Pulmonary<br>embolism, Pulmonary<br>vasculitis,<br>Glossoptosis,<br>Laryngospasm, Glottis<br>edema, Pulmonary<br>hypertension |

2674  
2675  
2676

### 26.5.7. Gastrointestinal symptom

| Side effects grade                  | Grade 1                                                          | Grade 2                                                                     | Grade 3                                                               |
|-------------------------------------|------------------------------------------------------------------|-----------------------------------------------------------------------------|-----------------------------------------------------------------------|
| Nausea, Vomit                       | Nausea                                                           | Vomit                                                                       | -                                                                     |
| Diarrhea                            | Loose passage                                                    | Watery stool not<br>applicable to Grade 3                                   | Watery stool with<br>dehydration and/or<br>electrolyte abnormalities  |
| Gastrointestinal<br>bleeding        | Fecal occult blood (+)                                           | Bloody stool or<br>Hematemesis without<br>shock and anemia<br>(Hb ≤8.0g/dL) | Bloody stool or<br>Hematemesis with shock<br>and anemia (Hb ≤8.0g/dL) |
| Abnormalities in the<br>oral cavity | Subjective discomfort<br>in the oral cavity                      | Ulcerative stomatitis                                                       | -                                                                     |
|                                     | Objective discomfort in the oral cavity with<br>inflammation etc |                                                                             | -                                                                     |
| Abnormalities in the<br>esophagus   | Subjective discomfort<br>in the esophagus                        | Objective discomfort in the esophagus with<br>inflammation etc              |                                                                       |
| Dysphagia                           | -                                                                | Difficulty in                                                               | Impossible to swallow                                                 |

|                                       |                                                                                                                                      |                                                                                      |                                               |
|---------------------------------------|--------------------------------------------------------------------------------------------------------------------------------------|--------------------------------------------------------------------------------------|-----------------------------------------------|
|                                       |                                                                                                                                      | swallowing                                                                           |                                               |
| Abnormalities in the gastrointestinal | Subjective discomfort in the gastrointestinal                                                                                        | -                                                                                    | -                                             |
| Pain                                  | Stomach or bowel pain not applicable to Grade 2                                                                                      | Excruciating pain                                                                    | -                                             |
| Inflammation                          | Gastritis, Enteritis, Colitis, and Proctitis                                                                                         |                                                                                      |                                               |
|                                       | -                                                                                                                                    | Hemorrhagic colitis, Pseudomembranous colitis                                        |                                               |
| Ulcer                                 | Erosion                                                                                                                              | Gastric ulcer, Duodenal ulcer, Hemorrhagic ulcer, Small intestine ulcer, Colon ulcer | Gastrointestinal perforation                  |
| Ireus                                 | Constipation                                                                                                                         |                                                                                      | Ileus paralytic                               |
| Abnormality in the anal               | Subjective discomfort in the anal                                                                                                    | -                                                                                    | -                                             |
|                                       | Objective discomfort in the anal with inflammation etc                                                                               |                                                                                      | -                                             |
| Disorder in the pancreas              | Abnormal value of amylase                                                                                                            | Pancreatitis not applicable to Grade 3                                               | Pancreatic necrosis, Hemorrhagic pancreatitis |
| Other symptoms                        | Hiccup, Thirstiness, Belch, Pigmentation in the colonic mucous membrane, Meteorism, Flatus, Sulphurous odor, Frequent bowel movement | -                                                                                    | -                                             |
|                                       | Sialadenitis, Copracrasia                                                                                                            |                                                                                      | -                                             |

2677  
2678  
2679

### 26.5.8. Cardiovascular symptom

| Side effects grade                | Grade 1                                                                                                                       | Grade 2                                                                                                                                        | Grade 3                                                                                                                                                                     |
|-----------------------------------|-------------------------------------------------------------------------------------------------------------------------------|------------------------------------------------------------------------------------------------------------------------------------------------|-----------------------------------------------------------------------------------------------------------------------------------------------------------------------------|
| Decrease of blood pressure (mmHg) | -                                                                                                                             | <90 and ≥80                                                                                                                                    | <80                                                                                                                                                                         |
| Decrease of blood pressure        | Syncope, Orthostatic dizziness, Orthostatic hypotension                                                                       |                                                                                                                                                | Pulselessness                                                                                                                                                               |
| Increase in blood pressure        | Increase in blood pressure, Hypertension                                                                                      |                                                                                                                                                | -                                                                                                                                                                           |
| Cardiovascular disorder           | -                                                                                                                             | -                                                                                                                                              | Shock, Cyanosis, Peripheral circulatory failure                                                                                                                             |
| Tachycardia (bpm)                 | -                                                                                                                             | ≥110 and <130                                                                                                                                  | ≥110                                                                                                                                                                        |
| Bradycardia (bpm)                 | -                                                                                                                             | <50 and ≥40                                                                                                                                    | <40                                                                                                                                                                         |
| Arrhythmia                        | Palpitation, Arrhythmia (ECG unmeasured), Supraventricular premature contraction, Ventricular premature contraction (single), | Supraventricular tachycardia, Ventricular premature contraction (double), Bigeminal pulse, Atrial tachycardia, Atrial fibrillation, Paroxysmal | Ventricular premature contraction (more than triple, multifocal), Ventricular tachycardia (more than sextuple), Ventricular fibrillation, Torsades de pointes, Third-degree |

|                                                    |                                                                                                                             |                                                                                                                                                                                                             |                                                                                                                                                                                                                                                              |
|----------------------------------------------------|-----------------------------------------------------------------------------------------------------------------------------|-------------------------------------------------------------------------------------------------------------------------------------------------------------------------------------------------------------|--------------------------------------------------------------------------------------------------------------------------------------------------------------------------------------------------------------------------------------------------------------|
|                                                    | First-degree atrioventricular block                                                                                         | tachycardia, Second-degree atrioventricular block, Atrioventricular dissociation, Sinus pause, Bundle branch block, Nodal rhythm, Ventricular rhythm                                                        | atrioventricular block, cardiac arrest, Adams-Stokes syndrome                                                                                                                                                                                                |
| Abnormal ECG                                       | P-wave disappearance<br>PR, PQ extension                                                                                    | ST increase, ST decrease, T-wave inversion, T-wave leveling, U-wave, QT extension, wide QRS                                                                                                                 | -                                                                                                                                                                                                                                                            |
| Heart failure like a symptom                       | 60%≥ LVEF >50%,<br>20≤ pulmonary artery systolic pressure <30,<br>Shortness of breath,<br>Hugh-Jones classification grade 2 | Edema (whole body, local),<br>50%≥ LVEF >40%,<br>2.5 L/min/m <sup>2</sup> ≥<br>Cardiac index,<br>30≤ pulmonary artery systolic pressure <40,<br>Dyspnea on exertion,<br>Hugh-Jones classification grade 3,4 | Congestive heart failure, Right heart failure, Left heart failure, acute heart failure, Cardiac enlargement, 40%> LVEF, 2.2 L/min/m <sup>2</sup> ≥ Cardiac index, 40< pulmonary artery systolic pressure, Dyspnea at rest, Hugh-Jones classification grade 5 |
| Ischemic heart disease like a symptom              | Chest discomfort, Chest agony, Chest tightness                                                                              | -                                                                                                                                                                                                           | Deterioration of angina pectoris, Angina attacks, Myocardial infarction, Myocardial necrosis                                                                                                                                                                 |
|                                                    | Chest pain, Anginal pain, Myocardial ischemia, Coronary insufficiency                                                       |                                                                                                                                                                                                             |                                                                                                                                                                                                                                                              |
| Impairment of myocardium, pericardium, endocardium | -                                                                                                                           | Pericarditis, Pericardial effusion, Arteriosclerosis                                                                                                                                                        | Myocarditis, Myocardial fibrosis                                                                                                                                                                                                                             |
|                                                    | Myocardial dysfunction                                                                                                      |                                                                                                                                                                                                             |                                                                                                                                                                                                                                                              |
| Vascular disease                                   | Vascular pain                                                                                                               | Vasospasm, Intermittent claudication, Arteriosclerosis                                                                                                                                                      | Gangrene, Vasculitis, Thrombophlebitis, Thrombosis, Thromboembolism                                                                                                                                                                                          |
|                                                    | Raynaud's syndrome                                                                                                          |                                                                                                                                                                                                             |                                                                                                                                                                                                                                                              |
| Other symptoms                                     | Flushing, Feverish, Burning sensation, Hot flash                                                                            | -                                                                                                                                                                                                           | -                                                                                                                                                                                                                                                            |

2680  
2681  
2682

### 26.5.9. Neuropsychiatric symptom

| Side effects grade                       | Grade 1                                                                | Grade 2                                                               | Grade 3                                                                                     |
|------------------------------------------|------------------------------------------------------------------------|-----------------------------------------------------------------------|---------------------------------------------------------------------------------------------|
| Psychic activity and behavioral disorder | Subjective mood elevation, mood instability, depressed motivation, the | Objective mood elevation, mood instability, depressed motivation, the | Severe and uncontrollable symptom in grade 2, Continuous delusion, hallucination, delirium, |

|                              |                                                                                                                                                            |                                                                                                                                                                                                                                                                  |                                                                                                                     |
|------------------------------|------------------------------------------------------------------------------------------------------------------------------------------------------------|------------------------------------------------------------------------------------------------------------------------------------------------------------------------------------------------------------------------------------------------------------------|---------------------------------------------------------------------------------------------------------------------|
|                              | decline in intellectual ability, Insomnia                                                                                                                  | decline in intellectual ability with a behavioral disorder, Insomnia                                                                                                                                                                                             |                                                                                                                     |
| Disturbance of consciousness | Subjective disturbance of consciousness                                                                                                                    | Objective disturbance of consciousness                                                                                                                                                                                                                           | Severe and continuous symptom in the grade 2                                                                        |
| Movement disorder            | Mild myalgia and arthralgia, Transient and mild involuntary movement, Subjective abnormal muscle tension, Subjective speech impairment, Decreased reflexes | Objective gait impairment, Objective muscle weakness, Severe and continuous myalgia, and arthralgia, Continuous involuntary movement, Severe abnormal muscle tension, Objective speech impairment, Transient oculomotor disturbance, Hyperreflexia, Hyporeflexia | Severe and continuous symptom in grade 2 requires assistance with daily activities                                  |
| Convulsion                   | Subjective symptom                                                                                                                                         | Local convulsion                                                                                                                                                                                                                                                 | General convulsion                                                                                                  |
| Sensory impairment           | Subjective hearing impairment, visual impairment,                                                                                                          | Objective and transient hearing impairment, visual impairment                                                                                                                                                                                                    | Irreversible hearing impairment, visual impairment, olfactory impairment, taste disorder, sensory impairment        |
|                              | Transient olfactory impairment, taste disorder, sensory impairment                                                                                         |                                                                                                                                                                                                                                                                  |                                                                                                                     |
| Neuropathy                   | Transient neuralgia                                                                                                                                        | Continuous neuralgia                                                                                                                                                                                                                                             | Severe and continuous symptom in grade 2 requires assistance with daily activities                                  |
| Dependency                   | -                                                                                                                                                          | Mild psychodependence with the trend toward increased use                                                                                                                                                                                                        | Physical dependence, Withdrawal symptoms                                                                            |
| Other symptoms               | Yawning, Syncopy, Floating sensation, headache Dizziness, Head pressure sensation, Fatigue, Feeling sick, Lethargy                                         | Difficulty in swallowing, Drooling                                                                                                                                                                                                                               | Dysphagia, Malignant syndrome, Malignant hyperthermia, Encephalopathy, Cerebral meningitis, Cerebrovascular disease |

2683  
2684  
2685

#### 26.5.10. Metabolic and electrolyte abnormalities

| Side effects grade           | Grade 1                                  | Grade 2                                  | Grade 3                                               |
|------------------------------|------------------------------------------|------------------------------------------|-------------------------------------------------------|
| Abnormality of blood glucose | Casual blood glucose: 120 - 200, Fasting | Casual blood glucose: 201 - 300, Fasting | Casual blood glucose: $\geq$ 300, Hyperglycemic coma, |

|                                |                                                                                         |                                                                                                                                                                                    |                                                                                                                            |
|--------------------------------|-----------------------------------------------------------------------------------------|------------------------------------------------------------------------------------------------------------------------------------------------------------------------------------|----------------------------------------------------------------------------------------------------------------------------|
|                                | blood glucose: 120 - 140, Postprandial blood glucose: 160 - 200, Blood glucose: 60 - 69 | blood glucose: 141 - 200, Postprandial blood glucose: 201 - 300, Blood glucose: 50 - 59, Dizziness, Headache, Hunger sensation, Irritation, Prominent symptoms due to hypoglycemia | Blood glucose: $\leq 50$ , Hypoglycemic coma, Convulsion                                                                   |
| Metabolic acidosis             | pH 7.20 - 7.35                                                                          | pH 7.15 - 7.20                                                                                                                                                                     | pH $< 7.15$<br>Disturbance of consciousness, Decrease of blood pressure, Convulsion, Respiratory failure                   |
| Metabolic alkalosis            | pH 7.46 - 7.50                                                                          | pH 7.50 - 7.60                                                                                                                                                                     | pH $\geq 7.60$<br>Convulsion, Tetanus, Hypertension, Arrhythmia                                                            |
| Abnormality of blood calcium   | 10.6 - 12.1<br>8.0 - 8.5                                                                | 12.1 - 15.0<br>6.5 - 8.0                                                                                                                                                           | $\geq 15$ , $< 6.5$<br>Disturbance of consciousness, Tetanus, Decrease of blood pressure, Arrhythmia, Psychiatric symptoms |
| Abnormality of blood potassium | 5.0 - 5.5<br>3.1 - 3.5                                                                  | 5.5 - 6.0<br>2.5 - 3.1                                                                                                                                                             | $\geq 6.0$ , $< 2.5$<br>Arrhythmia, Muscular weakness, Arrhythmia                                                          |
| Abnormality of blood sodium    | 150 - 155<br>125 - 135                                                                  | 155 - 160<br>115 - 125                                                                                                                                                             | $\geq 160$ , $< 115$<br>Disturbance of consciousness, Convulsion, Psychiatric symptoms, Pathological reflex                |

2686  
2687

## 26.6. Appendix 5: MMT test sheet

| Manual Muscle Test (MMT) sheet                                                                                                                                                    |       |                                                                                                                                                                   |
|-----------------------------------------------------------------------------------------------------------------------------------------------------------------------------------|-------|-------------------------------------------------------------------------------------------------------------------------------------------------------------------|
| To evaluate the muscle strength using the Medical Research Council (MRC) score* (Neck flexion, shoulder abduction, elbow flexion, wrist flexion, hip flexion, and ankle flexion). |       |                                                                                                                                                                   |
| ※MRC score                                                                                                                                                                        |       |                                                                                                                                                                   |
| 0: Nocontraction                                                                                                                                                                  |       |                                                                                                                                                                   |
| 1: Flicker or trace of contraction                                                                                                                                                |       |                                                                                                                                                                   |
| 2: Active movement, with gravity, eliminated                                                                                                                                      |       |                                                                                                                                                                   |
| 3: Active movement against gravity                                                                                                                                                |       |                                                                                                                                                                   |
| 4: Active movement against gravity and resistance                                                                                                                                 |       |                                                                                                                                                                   |
| 5: Normal power                                                                                                                                                                   |       |                                                                                                                                                                   |
| Subject number                                                                                                                                                                    |       |                                                                                                                                                                   |
| Date of examination                                                                                                                                                               |       |                                                                                                                                                                   |
| Site of measurement                                                                                                                                                               |       |                                                                                                                                                                   |
| MRC score                                                                                                                                                                         |       |                                                                                                                                                                   |
| Shoulder abduction                                                                                                                                                                | Right | <input type="checkbox"/> 0 <input type="checkbox"/> 1 <input type="checkbox"/> 2 <input type="checkbox"/> 3 <input type="checkbox"/> 4 <input type="checkbox"/> 5 |
|                                                                                                                                                                                   | Left  | <input type="checkbox"/> 0 <input type="checkbox"/> 1 <input type="checkbox"/> 2 <input type="checkbox"/> 3 <input type="checkbox"/> 4 <input type="checkbox"/> 5 |

|               |       |                            |                            |                            |                            |                            |                            |
|---------------|-------|----------------------------|----------------------------|----------------------------|----------------------------|----------------------------|----------------------------|
| Elbow flexion | Right | <input type="checkbox"/> 0 | <input type="checkbox"/> 1 | <input type="checkbox"/> 2 | <input type="checkbox"/> 3 | <input type="checkbox"/> 4 | <input type="checkbox"/> 5 |
|               | Left  | <input type="checkbox"/> 0 | <input type="checkbox"/> 1 | <input type="checkbox"/> 2 | <input type="checkbox"/> 3 | <input type="checkbox"/> 4 | <input type="checkbox"/> 5 |
| Wrist flexion | Right | <input type="checkbox"/> 0 | <input type="checkbox"/> 1 | <input type="checkbox"/> 2 | <input type="checkbox"/> 3 | <input type="checkbox"/> 4 | <input type="checkbox"/> 5 |
|               | Left  | <input type="checkbox"/> 0 | <input type="checkbox"/> 1 | <input type="checkbox"/> 2 | <input type="checkbox"/> 3 | <input type="checkbox"/> 4 | <input type="checkbox"/> 5 |
| Hip flexion   | Right | <input type="checkbox"/> 0 | <input type="checkbox"/> 1 | <input type="checkbox"/> 2 | <input type="checkbox"/> 3 | <input type="checkbox"/> 4 | <input type="checkbox"/> 5 |
|               | Left  | <input type="checkbox"/> 0 | <input type="checkbox"/> 1 | <input type="checkbox"/> 2 | <input type="checkbox"/> 3 | <input type="checkbox"/> 4 | <input type="checkbox"/> 5 |
| Ankle flexion | Right | <input type="checkbox"/> 0 | <input type="checkbox"/> 1 | <input type="checkbox"/> 2 | <input type="checkbox"/> 3 | <input type="checkbox"/> 4 | <input type="checkbox"/> 5 |
|               | Left  | <input type="checkbox"/> 0 | <input type="checkbox"/> 1 | <input type="checkbox"/> 2 | <input type="checkbox"/> 3 | <input type="checkbox"/> 4 | <input type="checkbox"/> 5 |

2688  
2689

### 26.7. Appendix 6: Norris Scale Worksheet

| Modified Norris Scale Worksheet |                                                   |                          |                                          |                          |                                                                    |                          |                                                                                       |                          |        |
|---------------------------------|---------------------------------------------------|--------------------------|------------------------------------------|--------------------------|--------------------------------------------------------------------|--------------------------|---------------------------------------------------------------------------------------|--------------------------|--------|
| Subject number                  |                                                   |                          |                                          |                          |                                                                    |                          |                                                                                       |                          |        |
| Date of examination             |                                                   |                          |                                          |                          |                                                                    |                          |                                                                                       |                          |        |
| Name of evaluator               |                                                   |                          |                                          |                          |                                                                    |                          |                                                                                       |                          |        |
| Limb Norris Scale               |                                                   |                          |                                          |                          |                                                                    |                          |                                                                                       |                          |        |
|                                 |                                                   | Normal (3)               |                                          | Impaired (2)             |                                                                    | Trace (1)                |                                                                                       | Impossible (0)           |        |
| 1                               | Hold up head                                      | <input type="checkbox"/> | Able to hold 60 degrees flexion position | <input type="checkbox"/> | Able to hold 30 degrees flexion position                           | <input type="checkbox"/> | Able to hold 0 - 30 degrees flexion position                                          | <input type="checkbox"/> | Unable |
| 2                               | Turn over                                         | <input type="checkbox"/> | Normal                                   | <input type="checkbox"/> | Able to do it alone with effort and time                           | <input type="checkbox"/> | Able to do it with assistance                                                         | <input type="checkbox"/> | Unable |
| 3                               | Rise from a supine position to a sitting position | <input type="checkbox"/> | Normal                                   | <input type="checkbox"/> | Able to do it alone with effort and time                           | <input type="checkbox"/> | Able to do it with assistance                                                         | <input type="checkbox"/> | Unable |
| 4                               | Write your name                                   | <input type="checkbox"/> | Normal                                   | <input type="checkbox"/> | Able to do it alone by using a pen with effort and time (readable) | <input type="checkbox"/> | Able to do it by using a marker pen with effort and time (readable)                   | <input type="checkbox"/> | Unable |
| 5                               | Wear shirts                                       | <input type="checkbox"/> | Normal                                   | <input type="checkbox"/> | Able to do it alone with effort and time                           | <input type="checkbox"/> | Able to do it with assistance                                                         | <input type="checkbox"/> | Unable |
| 6                               | Fasten buttons on your shirts                     | <input type="checkbox"/> | Normal                                   | <input type="checkbox"/> | Able to do it alone with effort and time                           | <input type="checkbox"/> | Able to do it with assistance                                                         | <input type="checkbox"/> | Unable |
| 7                               | Wear pants                                        | <input type="checkbox"/> | Normal                                   | <input type="checkbox"/> | Able to do it alone with effort and time                           | <input type="checkbox"/> | Able to do it with assistance                                                         | <input type="checkbox"/> | Unable |
| 8                               | Draw a line with a ruler                          | <input type="checkbox"/> | Normal                                   | <input type="checkbox"/> | Able to do it alone with effort and time                           | <input type="checkbox"/> | Able to do it alone but it's not practical, or able to do it with a self-service tool | <input type="checkbox"/> | Unable |
| 9                               | Grab a fork or spoon                              | <input type="checkbox"/> | Normal                                   | <input type="checkbox"/> | Able to do it alone with effort and time                           | <input type="checkbox"/> | Able to do it alone but it's not practical, or able to do it with a self-service tool | <input type="checkbox"/> | Unable |
| 10                              | Pour tea from a teapot into a                     | <input type="checkbox"/> | Normal                                   | <input type="checkbox"/> | Able to do it alone with                                           | <input type="checkbox"/> | Able to do it with assistance                                                         | <input type="checkbox"/> | Unable |



|                            |                                  |                          |                                 |                          |                                                |                          |                                                      |                          |                                                   |
|----------------------------|----------------------------------|--------------------------|---------------------------------|--------------------------|------------------------------------------------|--------------------------|------------------------------------------------------|--------------------------|---------------------------------------------------|
|                            | bowl and drink it                |                          |                                 |                          | effort and time                                |                          | or a self-service tool                               |                          |                                                   |
| 11                         | Stand up and bow                 | <input type="checkbox"/> | Normal                          | <input type="checkbox"/> | Able to do it alone with effort and time       | <input type="checkbox"/> | Unable to do it in enough form                       | <input type="checkbox"/> | Unable                                            |
| 12                         | Comb your hair                   | <input type="checkbox"/> | Normal                          | <input type="checkbox"/> | Able to do it alone with effort and time       | <input type="checkbox"/> | Able to do it with assistance                        | <input type="checkbox"/> | Unable                                            |
| 13                         | Brush your teeth                 | <input type="checkbox"/> | Normal                          | <input type="checkbox"/> | Able to do it alone with effort and time       | <input type="checkbox"/> | Able to do it with assistance or a self-service tool | <input type="checkbox"/> | Unable                                            |
| 14                         | Lift a book or tray              | <input type="checkbox"/> | Normal                          | <input type="checkbox"/> | Able to lift a light book                      | <input type="checkbox"/> | Able to lift an empty tray                           | <input type="checkbox"/> | Unable                                            |
| 15                         | Lift a pen                       | <input type="checkbox"/> | Normal                          | <input type="checkbox"/> | Able to do it alone with effort and time       | <input type="checkbox"/> | Unable to do it in enough form                       | <input type="checkbox"/> | Unable                                            |
| 16                         | Change the position on your arms | <input type="checkbox"/> | Normal                          | <input type="checkbox"/> | Able to do it alone with effort and time       | <input type="checkbox"/> | Able to do it with assistance                        | <input type="checkbox"/> | Unable                                            |
| 17                         | Go upstairs                      | <input type="checkbox"/> | Normal                          | <input type="checkbox"/> | Able to do it alone with effort and time       | <input type="checkbox"/> | Able to do it with assistance                        | <input type="checkbox"/> | Unable                                            |
| 18                         | Walk 50 meters                   | <input type="checkbox"/> | Normal                          | <input type="checkbox"/> | Able to do it alone with effort and time       | <input type="checkbox"/> | Able to walk within 50 meters                        | <input type="checkbox"/> | Unable                                            |
| 19                         | Walk alone                       | <input type="checkbox"/> | Normal                          | <input type="checkbox"/> | Able to walk everywhere with effort and time   | <input type="checkbox"/> | Able to walk in limited places and distances         | <input type="checkbox"/> | Unable                                            |
| 20                         | Walk with assistance             | <input type="checkbox"/> | Able to walk without assistance | <input type="checkbox"/> | Able to walk with assistance                   | <input type="checkbox"/> | Able to walk 1 meter with assistance                 | <input type="checkbox"/> | Unable                                            |
| 21                         | Stand up from a sitting position | <input type="checkbox"/> | Normal                          | <input type="checkbox"/> | Able to do it alone with effort and time       | <input type="checkbox"/> | Able to do it with assistance                        | <input type="checkbox"/> | Unable                                            |
| <b>Norris Bulbar Scale</b> |                                  |                          |                                 |                          |                                                |                          |                                                      |                          |                                                   |
|                            |                                  |                          | Normal (3)                      |                          | Impaired (2)                                   |                          | Trace (1)                                            |                          | Impossible (0)                                    |
| 1                          | Breathe out all at once          | <input type="checkbox"/> | Normal                          | <input type="checkbox"/> | Able to do it, but it's weak                   | <input type="checkbox"/> | Breath leak into you nose                            | <input type="checkbox"/> | Unable                                            |
| 2                          | Whistle                          | <input type="checkbox"/> | Normal                          | <input type="checkbox"/> | Able to do it, but it's weak                   | <input type="checkbox"/> | Unable to whistle but able to pout                   | <input type="checkbox"/> | Unable                                            |
| 3                          | Puff up your cheeks              | <input type="checkbox"/> | Normal                          | <input type="checkbox"/> | Breath leaks out when your cheeks are pressed  | <input type="checkbox"/> | Able to close lips but cheeks don't puff out         | <input type="checkbox"/> | Unable to close lips                              |
| 4                          | Move your jaw                    | <input type="checkbox"/> | Able to move in any direction   | <input type="checkbox"/> | Able to do it, but it's weak                   | <input type="checkbox"/> | Able to do it, but it's extremely weak and slow      | <input type="checkbox"/> | Unable                                            |
| 5                          | Say "la la la"                   | <input type="checkbox"/> | Normal                          | <input type="checkbox"/> | Able to say slowly                             | <input type="checkbox"/> | Pronunciation is unclear                             | <input type="checkbox"/> | Unable                                            |
| 6                          | Stick out your tongue            | <input type="checkbox"/> | Normal                          | <input type="checkbox"/> | Able to stick out your tongue beyond your lips | <input type="checkbox"/> | Able to stick out your tongue to your dentition      | <input type="checkbox"/> | Unable to stick out your tongue to your dentition |
| 7                          | Place your tongue on the         | <input type="checkbox"/> | Able to place your tongue on    | <input type="checkbox"/> | Able to place your tongue on                   | <input type="checkbox"/> | Able to place your tongue on                         | <input type="checkbox"/> | Unable to place your tongue on                    |

|    | inside of your cheek              |                          | the inside of your cheek and contract your tongue strongly |                          | the inside of your cheek, but contraction is weak      |                          | the inside of your cheek but no contraction                                                   |                          | the inside of your cheek        |
|----|-----------------------------------|--------------------------|------------------------------------------------------------|--------------------------|--------------------------------------------------------|--------------------------|-----------------------------------------------------------------------------------------------|--------------------------|---------------------------------|
| 8  | Place your tongue on your maxilla | <input type="checkbox"/> | Able to place your tongue strongly against the maxilla     | <input type="checkbox"/> | Able to place and hold your tongue against the maxilla | <input type="checkbox"/> | Able to move your tongue upward                                                               | <input type="checkbox"/> | Hardly able to move your tongue |
| 9  | Cough                             | <input type="checkbox"/> | Normal                                                     | <input type="checkbox"/> | Able to cough and expectorate, but it's weak           | <input type="checkbox"/> | Able to cough but unable to expectorate                                                       | <input type="checkbox"/> | Unable                          |
| 10 | Drool                             | <input type="checkbox"/> | None                                                       | <input type="checkbox"/> | Drool while looking down, eating, and talking          | <input type="checkbox"/> | Drool even when not looking down, eating and talking, or sometimes need to wipe the drool off | <input type="checkbox"/> | Constantly drool                |
| 11 | Nasal sound                       | <input type="checkbox"/> | None                                                       | <input type="checkbox"/> | A little                                               | <input type="checkbox"/> | Remarkable                                                                                    | <input type="checkbox"/> | Unable to understand            |
| 12 | Dysarthria                        | <input type="checkbox"/> | None                                                       | <input type="checkbox"/> | Sometimes unable to understand                         | <input type="checkbox"/> | Sometimes able to understand                                                                  | <input type="checkbox"/> | Hardly able to understand       |
| 13 | Meals                             | <input type="checkbox"/> | Regular food                                               | <input type="checkbox"/> | Soft food                                              | <input type="checkbox"/> | Minced food                                                                                   | <input type="checkbox"/> | Semifluid food                  |

2690  
2691  
2692  
2693  
2694

## 26.8. Appendix 7: ALSAQ 40 Questionnaire

### 26.8.1. ALSAQ 40 (Japanese version)

ALSAQ 40 (Japanese version) was used in this study.

| Amyotrophic Lateral Sclerosis Assessment Questionnaire 40 (ALSAQ 40)                               |                                                                              |
|----------------------------------------------------------------------------------------------------|------------------------------------------------------------------------------|
| 被験者識別コード                                                                                           |                                                                              |
| アンケート実施日                                                                                           |                                                                              |
| 記載者                                                                                                | <input type="checkbox"/> 患者 <input type="checkbox"/> 家族 (続柄: )               |
| 以下の質問は、ここ 2 週間であなたに生じたかもしれない問題について説明したものです。それぞれについてその状況がどれくらいあなたに起こったか、最もよくあてはまる番号にひとつだけ○印をつけて下さい。 | 次 1<br>～ 2<br>0<br>は、<br>ここ<br>2 週<br>間で<br>あなたに<br>生じたか<br>もし<br>れない<br>問題に |

|   |                                   |          |          |         |         |          |                                                                     |
|---|-----------------------------------|----------|----------|---------|---------|----------|---------------------------------------------------------------------|
|   |                                   |          |          |         |         |          | ついて説明したものです。それぞれについてその状況がどれくらいあなたに起こったか、最もよくあてはまる番号にひとつだけ○印をつけて下さい。 |
|   |                                   |          |          |         |         |          |                                                                     |
|   |                                   | まったくなかった | ほとんどなかった | ときどきあった | しばしばあった | まったくできない | いつもそうだった                                                            |
| 1 | たとえば家のまわりなど、短い距離を歩くのがむずかしかったことがある | 1        | 2        | 3       | 4       | 5        |                                                                     |
| 2 | 歩いている途中で、転んだことがある                 | 1        | 2        | 3       | 4       | 5        |                                                                     |

|    |                                       |   |   |   |   |   |
|----|---------------------------------------|---|---|---|---|---|
| 3  | 歩いている、つまずいたり、よろけたりしたことがある             | 1 | 2 | 3 | 4 | 5 |
| 4  | 歩いている途中で、バランスを失ったことがある                | 1 | 2 | 3 | 4 | 5 |
| 5  | 歩くことに神経を集中しなければ歩けなかったことがある            | 1 | 2 | 3 | 4 | 5 |
| 6  | 歩いている、へとへとに疲れたことがある                   | 1 | 2 | 3 | 4 | 5 |
| 7  | 歩いている、足に痛みを感じたことがある                   | 1 | 2 | 3 | 4 | 5 |
| 8  | 階段ののぼりおりがむずかしかったことがある                 | 1 | 2 | 3 | 4 | 5 |
| 9  | 立っているのがむずかしかったことがある                   | 1 | 2 | 3 | 4 | 5 |
| 10 | いすから立ち上がるのがむずかしかったことがある               | 1 | 2 | 3 | 4 | 5 |
| 11 | 腕や手を動かすのがむずかしかったことがある                 | 1 | 2 | 3 | 4 | 5 |
| 12 | 寝床で寝がえりをうつのがむずかしかったことがある              | 1 | 2 | 3 | 4 | 5 |
| 13 | ものをひろい上げることがむずかしかったことがある              | 1 | 2 | 3 | 4 | 5 |
| 14 | 本や新聞をつかんだり、ページをめくったりすることがむずかしかったことがある | 1 | 2 | 3 | 4 | 5 |
| 15 | ものをはっきり書くことがむずかしかったことがある              | 1 | 2 | 3 | 4 | 5 |
| 16 | 家事をすることがむずかしかったことがある                  | 1 | 2 | 3 | 4 | 5 |
| 17 | 自分で食事をするのがむずかしかったことがある                | 1 | 2 | 3 | 4 | 5 |
| 18 | 髪をとくしたり、歯みがきをするのがむずかしかったことがある         | 1 | 2 | 3 | 4 | 5 |
| 19 | 服を着ることがむずかしかったことがある                   | 1 | 2 | 3 | 4 | 5 |
| 20 | 洗面台で洗うことがむずかしかったことがある                 | 1 | 2 | 3 | 4 | 5 |

|    | る                                   |   |   |   |   |   |
|----|-------------------------------------|---|---|---|---|---|
| 21 | 飲み込むことがむずかしかったことがある                 | 1 | 2 | 3 | 4 | 5 |
| 22 | 固形のもを食べることがむずかしかったことがある             | 1 | 2 | 3 | 4 | 5 |
| 23 | 液体を飲むことがむずかしかったことがある                | 1 | 2 | 3 | 4 | 5 |
| 24 | 会話に参加することがむずかしかったことがある              | 1 | 2 | 3 | 4 | 5 |
| 25 | 自分が話したことが理解されにくかったと感じたことがある         | 1 | 2 | 3 | 4 | 5 |
| 26 | 話している途中で言葉がはっきりしなくなったり、どもったりしたことがある | 1 | 2 | 3 | 4 | 5 |
| 27 | 非常にゆっくりとしか話せなかったことがある               | 1 | 2 | 3 | 4 | 5 |
| 28 | 以前より話さなくなった                         | 1 | 2 | 3 | 4 | 5 |
| 29 | 思うように話せなくていらしたことがある                 | 1 | 2 | 3 | 4 | 5 |
| 30 | 話すときにまわりを気にしたことがある                  | 1 | 2 | 3 | 4 | 5 |
| 31 | さみしいと思ったことがある                       | 1 | 2 | 3 | 4 | 5 |
| 32 | 退屈だと思ったことがある                        | 1 | 2 | 3 | 4 | 5 |
| 33 | マナーと違うことをして、はずかしいと思ったことがある          | 1 | 2 | 3 | 4 | 5 |
| 34 | 将来に希望がもてないと思ったことがある                 | 1 | 2 | 3 | 4 | 5 |
| 35 | 自分は他の人にとって負担になっているのではないかと心配したことがある  | 1 | 2 | 3 | 4 | 5 |
| 36 | 自分はなぜ今の生活を続けているのかと思ったことがある          | 1 | 2 | 3 | 4 | 5 |
| 37 | この病気のために腹を立てたことがある                  | 1 | 2 | 3 | 4 | 5 |
| 38 | ゆううつな気分になったことがある                    | 1 | 2 | 3 | 4 | 5 |
| 39 | 将来、この病気によってどのような影響を受                | 1 | 2 | 3 | 4 | 5 |

|    |                              |   |   |   |   |   |
|----|------------------------------|---|---|---|---|---|
|    | けるのか心配になったことがある              |   |   |   |   |   |
| 40 | 自分にはまったく自由がないのではないかと感じたことがある | 1 | 2 | 3 | 4 | 5 |

2695  
2696  
2697  
2698

### 26.8.2. ALSAQ 40 (English version)

ALSAQ 40 (English version) was created for the English protocol version.

| Amyotrophic Lateral Sclerosis Assessment Questionnaire 40 (ALSAQ 40)                                                                                                                                      |                                                                             |                                                                                   |        |           |       |                            |
|-----------------------------------------------------------------------------------------------------------------------------------------------------------------------------------------------------------|-----------------------------------------------------------------------------|-----------------------------------------------------------------------------------|--------|-----------|-------|----------------------------|
| Subject number                                                                                                                                                                                            |                                                                             |                                                                                   |        |           |       |                            |
| Date of examination                                                                                                                                                                                       |                                                                             |                                                                                   |        |           |       |                            |
| Describer                                                                                                                                                                                                 |                                                                             | <input type="checkbox"/> Patient <input type="checkbox"/> Family (Relationship: ) |        |           |       |                            |
| The following questions are descriptions of problems you may have had while walking in the last two weeks. For each, please check the number that best describes how often the situation occurred to you. |                                                                             |                                                                                   |        |           |       |                            |
|                                                                                                                                                                                                           |                                                                             | Never                                                                             | Rarely | Sometimes | Often | Always or cannot do at all |
| 1                                                                                                                                                                                                         | I have found it difficult to walk short distances (e.g., around the house). | 1                                                                                 | 2      | 3         | 4     | 5                          |
| 2                                                                                                                                                                                                         | I have fallen over the whole walking.                                       | 1                                                                                 | 2      | 3         | 4     | 5                          |
| 3                                                                                                                                                                                                         | I have stumbled or tripped while walking.                                   | 1                                                                                 | 2      | 3         | 4     | 5                          |
| 4                                                                                                                                                                                                         | I have lost my balance while walking.                                       | 1                                                                                 | 2      | 3         | 4     | 5                          |
| 5                                                                                                                                                                                                         | I have had to concentrate while walking.                                    | 1                                                                                 | 2      | 3         | 4     | 5                          |
| 6                                                                                                                                                                                                         | Walking has tired me out.                                                   | 1                                                                                 | 2      | 3         | 4     | 5                          |
| 7                                                                                                                                                                                                         | I have had pains in my legs while walking.                                  | 1                                                                                 | 2      | 3         | 4     | 5                          |
| 8                                                                                                                                                                                                         | I have found it difficult to go up and down the stairs.                     | 1                                                                                 | 2      | 3         | 4     | 5                          |
| 9                                                                                                                                                                                                         | I have found it difficult to stand up.                                      | 1                                                                                 | 2      | 3         | 4     | 5                          |
| 10                                                                                                                                                                                                        | I have found it difficult to get myself up out of chairs.                   | 1                                                                                 | 2      | 3         | 4     | 5                          |
| 11                                                                                                                                                                                                        | I have had difficulty using my arms and hands.                              | 1                                                                                 | 2      | 3         | 4     | 5                          |
| 12                                                                                                                                                                                                        | I have found turning and moving in bed difficult.                           | 1                                                                                 | 2      | 3         | 4     | 5                          |
| 13                                                                                                                                                                                                        | I have found picking things up difficult.                                   | 1                                                                                 | 2      | 3         | 4     | 5                          |
| 14                                                                                                                                                                                                        | I have found holding books or newspapers, or turning pages, difficult.      | 1                                                                                 | 2      | 3         | 4     | 5                          |
| 15                                                                                                                                                                                                        | I have had difficulty writing clearly.                                      | 1                                                                                 | 2      | 3         | 4     | 5                          |
| 16                                                                                                                                                                                                        | I have found it difficult to do jobs around the house.                      | 1                                                                                 | 2      | 3         | 4     | 5                          |
| 17                                                                                                                                                                                                        | I have found it difficult to feed myself.                                   | 1                                                                                 | 2      | 3         | 4     | 5                          |
| 18                                                                                                                                                                                                        | I have had difficulty combing my hair or cleaning my teeth.                 | 1                                                                                 | 2      | 3         | 4     | 5                          |
| 19                                                                                                                                                                                                        | I have had difficulty getting dressed.                                      | 1                                                                                 | 2      | 3         | 4     | 5                          |
| 20                                                                                                                                                                                                        | I have had difficulty washing at the hand                                   | 1                                                                                 | 2      | 3         | 4     | 5                          |

|    | basin.                                                             |   |   |   |   |   |
|----|--------------------------------------------------------------------|---|---|---|---|---|
| 21 | I have had difficulty swallowing.                                  | 1 | 2 | 3 | 4 | 5 |
| 22 | I have had difficulty eating solid food.                           | 1 | 2 | 3 | 4 | 5 |
| 23 | I have found it difficult to drink liquids.                        | 1 | 2 | 3 | 4 | 5 |
| 24 | I have found it difficult to participate in conversations.         | 1 | 2 | 3 | 4 | 5 |
| 25 | I have felt that my speech has not been easy to understand.        | 1 | 2 | 3 | 4 | 5 |
| 26 | I have slurred or stutterer while speaking.                        | 1 | 2 | 3 | 4 | 5 |
| 27 | I have had to talk very slowly.                                    | 1 | 2 | 3 | 4 | 5 |
| 28 | I have talked less than I used to do.                              | 1 | 2 | 3 | 4 | 5 |
| 29 | I have been frustrated by my speech.                               | 1 | 2 | 3 | 4 | 5 |
| 30 | I have felt self-conscious about my speech.                        | 1 | 2 | 3 | 4 | 5 |
| 31 | I have felt lonely.                                                | 1 | 2 | 3 | 4 | 5 |
| 32 | I have been bored.                                                 | 1 | 2 | 3 | 4 | 5 |
| 33 | I have felt embarrassed in social situations.                      | 1 | 2 | 3 | 4 | 5 |
| 34 | I have felt hopeless about the future.                             | 1 | 2 | 3 | 4 | 5 |
| 35 | I have worried that I am a burden to other people.                 | 1 | 2 | 3 | 4 | 5 |
| 36 | I have wondered why I keep going.                                  | 1 | 2 | 3 | 4 | 5 |
| 37 | I have felt angry because of the disease.                          | 1 | 2 | 3 | 4 | 5 |
| 38 | I have felt depressed.                                             | 1 | 2 | 3 | 4 | 5 |
| 39 | I have worried about how the disease will affect me in the future. | 1 | 2 | 3 | 4 | 5 |
| 40 | I have felt as if I have no freedom.                               | 1 | 2 | 3 | 4 | 5 |

2699  
2700

## 27. DOCUMENT CHANGE HISTORY

### Ver 1.1 (2017.10.31)

#### • P.10 Overview [Statistical Methods] 1) Efficacy analysis

Reason for change: Error.

Before: Differences are considered significant if the lower boundary of the 95% least-squares mean confidence interval for the change in ALSFRS-R total score at Week 16 compared between the placebo and E0302-50 mg groups is  $\leq 0$ .

After: Differences are considered significant if the lower boundary of the 95% least-squares mean confidence interval for the change in ALSFRS-R total scores at Week 16 compared between the placebo and E0302-50 mg groups is  $\geq 0$ .

#### • P.56 18.1 Determination of Sample Size 1) Analysis method

Reason for change: Error.

Before: In a mixed-effects repeated measures data analysis (MMRM model), the change in ALSFRS-

R total score from randomization to Week 16 will be compared between placebo and E0302 - 50 mg and will be considered significant if the lower bound of the 95% confidence interval for the least-squares mean difference is  $\leq 0$ .

After: In a mixed-effects repeated measures data analysis (MMRM model), the change in ALSFRS-R total score from randomization to Week 16 will be compared between placebo and E0302 - 50 mg and will be considered significant if the lower bound of the 95% confidence interval for the least-squares mean difference is  $\geq 0$ .

• **P.56 18.2.2.4.1. Primary Endpoint 1) Primary analysis, Analysis method:**

Reason for change: Error.

Before: The change in ALSFRS-R from the date of allocation to each time point is defined as the response variable, and a linear model is fitted with treatment group, time point, minimization factor, the interaction between treatment group, and time point as a fixed effect, ALSFRS-R total score of the date of allocation as a covariate, and covariance structure of error variance as unstructured (unstructured) (MMRM analysis). Significance is considered significant if the lower bound of the 95% least-squares mean confidence interval for the difference in the ALSFRS-R total score at Week 16 of treatment when compared between the placebo and E0302 - 50 mg groups is  $\leq 0$ .

After: The change in ALSFRS-R from the date of allocation to each time point is defined as the response variable, and a linear model is fitted with treatment group, time point, minimization factor, the interaction between treatment group, and time point as a fixed effect, ALSFRS-R total score of the date of allocation as a covariate, and covariance structure of error variance as unstructured (unstructured) (MMRM analysis). Significance is considered significant if the lower bound of the 95% least-squares mean confidence interval for the difference in the ALSFRS-R total score at Week 16 of treatment when compared between the placebo and E0302 - 50 mg groups is  $> 0$ .

**Ver 1.2 (2018.1.24)**

• **P.13 2. HISTORY OF DEVELOPMENT (BACKGROUND INFORMATION)**

Reason for change: Correction of descriptions

Before: In addition, 41 patients with ALS received mecobalamin 50 mg versus no mecobalamin in an open, non-randomized, controlled trial.

After: In addition, 41 patients with ALS received mecobalamin 50 mg (repeated IM twice weekly) versus no mecobalamin in an open, non-randomized, controlled trial.

• **P.13 2. HISTORY OF DEVELOPMENT (BACKGROUND INFORMATION)**

Reason for change: Update of the results

Before: On the other hand, in the subgroup of subjects with ALS onset  $\leq 12$  months, dose-response prolonged the time to the event and reduced the ALSFRS-R total score.

After: On the other hand, in the subgroup of subjects with ALS onset  $\leq 12$  months (48 subjects in the placebo group, 54 subjects in the 25 mg group, and 42 subjects in the 50 mg group), dose-response prolonged the time to the event and reduced the ALSFRS-R total score.

• **P.13 2. HISTORY OF DEVELOPMENT (BACKGROUND INFORMATION)**

Reason for change: Update of the results

Before: In addition, a Phase III clinical study (E0302-J081-762) has been conducted by Eisai Co., Ltd. as an extension study of Phase II/III study (E0302-J081-761) to investigate the safety and efficacy of continuous long-term administration of E0302 - 50 mg in ALS patients. From the results of the 52 weeks assessment by the cut-off point (31 January 2014), there was no particular concern regarding the safety of long-term administration.

After: In addition, a Phase III clinical study (E0302-J081-762) was conducted by Eisai Co., Ltd. as an extension study of Phase II/III study (E0302-J081-761) to investigate the safety and efficacy of continuous long-term administration of E0302 - 50 mg in ALS patients. From the results of the 52



weeks assessment by the cut-off point (31 October 2014), there was no particular concern regarding the safety of long-term administration.

• **P.22 5.3. Storage of Investigational Drug**

Reason for change: Correction of descriptions

Before: The Supervisor of the Investigational Drug shall appropriately manage the investigational drug in accordance with the "Procedures for Handling of the E0302 Investigational Drug" and prepare the Investigational Drug Accountability Record to understand the status of use of the investigational drug and the progress of the study. The investigational product should be stored in a light-resistant container at room temperature.

After: The Supervisor of the Investigational Drug shall appropriately manage the investigational drug in accordance with the "Procedures for Management of the E0302 Investigational Drug" and prepare the Investigational Drug Accountability Record to understand the status of use of the investigational drug and the progress of the study. The investigational product should be stored in a light-resistant container at room temperature.

• **P.22 5.4. Delivery of Investigational Drug to Study Institution**

Reason for change: Correction of descriptions

Before: The Supervisor of the Investigational Drug shall record the status of receipt and export of the investigational drug, the status of use of the investigational drug for each subject, and the recall or disposition of unused investigational drugs in the Investigational Drug Accountability Record. Refer to the " Procedures for Handling of the E0302 Investigational Drug " for details of records related to the management of the investigational product.

After: The Supervisor of the Investigational Drug shall record the status of receipt and export of the investigational drug, the status of use of the investigational drug for each subject, and the recall or disposition of unused investigational drugs in the Investigational Drug Accountability Record. Refer to the " Procedures for Management of the E0302 Investigational Drug " for details of records related to the management of the investigational product.

• **P.25 5.6.1. Subjects who can attend the outpatient clinic**

Reason for change: Correction of descriptions

Before: In this clinical trial, the investigational product manager will appropriately store and manage the investigational product according to the " Procedures for Handling of the E0302 Investigational Drug ". The principal investigator will dispense the investigational product to the investigational product manager. The investigational product manager will dispense the product to the administrator. Subsequently, he/she will administer the drug to the subject.

After: In this clinical trial, the investigational product manager will appropriately store and manage the investigational product according to the " Procedures for Management of the E0302 Investigational Drug ". The principal investigator will dispense the investigational product to the investigational product manager. The investigational product manager will dispense the product to the administrator. Subsequently, he/she will administer the drug to the subject.

• **P.25 5.6.2.1. During the Treatment Period**

Reason for change: Newly created procedures are clearly marked.

Before: In principle, during the mid-Treatment period, the drug will be administered to subjects in outpatient clinics. If ambulatory visits become difficult due to reasons such as the progress of the underlying disease, they will be permitted to be administered by the investigational drug administrator at the subject's home or nearby medical institution. Storage of the investigational product at the subject's home is permitted. The following precautions should be taken when storing the investigational product at the subject's home.

After: In principle, during the mid-Treatment period, the drug will be administered to subjects in

outpatient clinics. If ambulatory visits become difficult due to reasons such as the progress of the underlying disease, they will be permitted to be administered by the investigational drug administrator at the subject's home or nearby medical institution. In addition, refer to the "Procedures for Delegation of Study Treatment." Storage of the investigational product at the subject's home is permitted. The following precautions should be taken when storing the investigational product at the subject's home.

• **P.26 6.2.1. Prohibited Concomitant Drugs and Therapy**

Reason for change: Correction of descriptions

Before: 1) Edaravone (Appendix 2)

After: 1) Drugs with Possible Efficacy in ALS (Appendix 2)

• **P.27 7.2. Obtaining Written Informed Consent 1) Timing and Methods of Initial Informed Consent**

Reason for change: Error

Before: If the subject has sufficient capacity to provide informed consent, but it is difficult to sign and seal or sign due to progression of the underlying disease, etc., the investigator or sub-investigator may confirm that the subject has agreed to participate in the study and obtain the subject's signed and sealed or signed written informed consent from the substitute. In this case, the relationship between the substitute and the subject, as well as a record of the consent, should also be stored. The substitute shall be the subject's spouse, custodian, guardian, or another person equivalent to the subject's substitute. He or she shall be a person who, in view of the substance of the lives of both parties and the joint spiritual relationship between them, is likely to be in the subject's best interests.

After: If the subject has sufficient capacity to provide informed consent, but it is difficult to sign and seal or sign due to progression of the underlying disease, etc., the investigator or sub-investigator may confirm that the subject has agreed to participate in the study and obtain the subject's signed and sealed or signed written informed consent from the witness. In this case, the relationship between the witness and the subject, as well as a record of the consent, should also be stored. A witness is a person who is independent of the conduct of the clinical trial, who is unfairly unaffected by persons involved in the clinical trial, and who attends the informed consent process when the subject is unable to read the consent form, etc.

• **P.28 7.2. Obtaining Written Informed Consent 4) Obtaining consent for the transition to the Continuous treatment period**

Reason for change: Error

Before:

After: If the subject wishes to continue treatment, written informed consent will be obtained from the subject or from the witness between Week 12 of treatment and the initiation of the Continuous treatment period.

• **P.28 7.2. Obtaining Written Informed Consent 5) Informed consent obtained from a nearby medical institution in which the patient receives the investigational product**

Reason for change: Error

Before: No description.

After: If it becomes difficult to attend the hospital as an outpatient, the investigational product administrator may administer the drug at a nearby medical institution. In such cases, written informed consent will be obtained from the subject on the basis of the "Procedures for Delegation of Study Treatment." Consent for self-administration at the subject's home will be obtained by the subject or family.

• **P.28 7.2. Obtaining Written Informed Consent 6) On the subject's health status, such as the**

**reason for progression of the primary disease during the treatment or continuation period**

Reason for change: Error

Before: No description.

After: For subjects who wish to self-administer the investigational product during the Continuous treatment period, on the basis of the "Procedures for self-administering the investigational product," written informed consent is obtained from the subject or from the family.

**• P.35 9.2.1.1. Observation period Week 12 (Completion of the observation period)**

Reason for change: Correction of descriptions

Before:

(1) Patient characteristics at the initiation of the observation period

5) Diagnosis

- Diagnosis according to the updated Awaji criteria (see 4.1 Diagnostic Criteria)
- Diagnosis according to El Escorial revised Airlie House diagnostic criteria (see 4.1 Diagnostic criteria)

After:

(1) Patient characteristics at the initiation of the observation period

5) Diagnosis

- Diagnosis according to the updated Awaji criteria (see 4.1 Diagnostic Criteria)
- Diagnosis according to El Escorial revised Airlie House diagnostic criteria (see 4.1 Diagnostic criteria)

(Electromyography and nerve conduction studies may be performed within one year prior to the initiation of the observation period. Electromyography and nerve conduction studies may be evaluated using the results of tests conducted at other medical institutions.)

**• P.51 Table 122 Adverse Reactions in Clinical Phase I, Phase II/III, and Phase III Studies**

Reason for change: Completion of Phase III study (E0302-J081-762)

Before:

| Study                                                                                                                   | E0302 Dosage   | Administration Pathway. | Side Effects                                                                                                                                                                                                                                         |
|-------------------------------------------------------------------------------------------------------------------------|----------------|-------------------------|------------------------------------------------------------------------------------------------------------------------------------------------------------------------------------------------------------------------------------------------------|
| Investigations of phases 1 Single-dose studies (E0302-E044-001) [Twenty-four Japanese and 24 Caucasians, respectively]. | 25 mg (n=12)   | IM injection            | Headache (1 Caucasian)                                                                                                                                                                                                                               |
|                                                                                                                         | 50 mg (n=12)   | IM injection            | Injection site pain (2 events in one Japanese)                                                                                                                                                                                                       |
|                                                                                                                         | 75 mg (n=12)   | IM injection            | Headache (one Caucasian), nausea (one Caucasian)                                                                                                                                                                                                     |
|                                                                                                                         | Placebo (n=12) | IM injection            | -                                                                                                                                                                                                                                                    |
| Investigations of phases 1 Repeat-dose study (E0302-E044-002) [Eighteen Japanese and 18 Caucasians (7 days)].           | 25 mg (n=12)   | IM injection            | -                                                                                                                                                                                                                                                    |
|                                                                                                                         | 50 mg (n=12)   | IM injection            | Dizziness (one Japanese), vulvovaginal discomfort (one Caucasian), and acneiform dermatitis (one Caucasian)                                                                                                                                          |
|                                                                                                                         | Placebo (n=12) | IM injection            | -                                                                                                                                                                                                                                                    |
| Phase II/III study (E0302-J081-761) [370 Japanese (182 weeks)].                                                         | 25 mg (n=124)  | IM injection            | Injection site induration (1 patient), abnormal liver function (2 patients), leukocytosis (1 patient), increased blood cholesterol (1 patient), increased blood urea nitrogen (1 patient), increased blood alkaline phosphatase (1 patient), sensory |

|                                                                              |                 |              |                                                                                                                                                                                                                                                                                                                                                                 |
|------------------------------------------------------------------------------|-----------------|--------------|-----------------------------------------------------------------------------------------------------------------------------------------------------------------------------------------------------------------------------------------------------------------------------------------------------------------------------------------------------------------|
|                                                                              |                 |              | disturbance (1 patient), erythema (1 patient), and pruritus (1 patient)                                                                                                                                                                                                                                                                                         |
|                                                                              | 50 mg (n=123)   | IM injection | Cardiac arrest (1 patient), liver disorder (1 patient), folliculitis (1 patient), increased white blood cell count (2 patients), increased platelet count (1 patient), positive urinary protein (1 patient), hypocalcemia (1 patient), urinary stones (1 patient), acne (1 patient), subcutaneous hemorrhage (1 patient), and seborrheic dermatitis (1 patient) |
|                                                                              | Placebo (n=123) | IM injection | Injection site pain (2 patients), liver enzyme elevation (1 patient), allergic dermatitis (1 patient), and urticaria (1 patient)                                                                                                                                                                                                                                |
| Phase III (E0302-J081-762) [120 Japanese].<br>Cut-off Data, 31 January 2014* | 50 mg (n=120)   | IM injection | Supraventricular extrasystole (1 patient), gastroesophageal reflux disease (1 patient), positive urinary protein (3 patients), increased blood bilirubin (1 patient), increased blood urea nitrogen (1 patient), urticaria (1 patient), hypertension (2 patients)                                                                                               |

\*: The Continuous treatment period is ongoing in subjects who completed Study E0302-J081-761. Aggregate data until the last day of the 52-week assessment obtained by the cut-off date as of January 2014. Urinary stones occurred in one subject as a serious adverse reaction after the last day of Week 52. In addition, no serious side effects were observed in three other clinical studies in ALS.

After:

| Study                                                                                                                   | E0302 Dosage   | Administration Pathway. | Side Effects                                                                                                                                                                                               |
|-------------------------------------------------------------------------------------------------------------------------|----------------|-------------------------|------------------------------------------------------------------------------------------------------------------------------------------------------------------------------------------------------------|
| Investigations of phases 1 Single-dose studies (E0302-E044-001) [Twenty-four Japanese and 24 Caucasians, respectively]. | 25 mg (n=12)   | IM injection            | Headache (1 Caucasian)                                                                                                                                                                                     |
|                                                                                                                         | 50 mg (n=12)   | IM injection            | Injection site pain (2 events in one Japanese)                                                                                                                                                             |
|                                                                                                                         | 75 mg (n=12)   | IM injection            | Headache (one Caucasian), nausea (one Caucasian)                                                                                                                                                           |
|                                                                                                                         | Placebo (n=12) | IM injection            | -                                                                                                                                                                                                          |
| Investigations of phases 1 Repeat-dose study (E0302-E044-002) [Eighteen Japanese and 18 Caucasians (7 days)].           | 25 mg (n=12)   | IM injection            | -                                                                                                                                                                                                          |
|                                                                                                                         | 50 mg (n=12)   | IM injection            | Dizziness (one Japanese), vulvovaginal discomfort (one Caucasian), and acneiform dermatitis (one Caucasian)                                                                                                |
|                                                                                                                         | Placebo (n=12) | IM injection            | -                                                                                                                                                                                                          |
| Phase II/III study (E0302-J081-761) [370 Japanese (182 weeks)].                                                         | 25 mg (n=124)  | IM injection            | Injection site induration (1 patient), abnormal liver function (2 patients), leukocytosis (1 patient), increased blood cholesterol (1 patient), increased blood urea nitrogen (1 patient), increased blood |

|                                                                                       |                 |              |                                                                                                                                                                                                                                                                                                                                                                 |
|---------------------------------------------------------------------------------------|-----------------|--------------|-----------------------------------------------------------------------------------------------------------------------------------------------------------------------------------------------------------------------------------------------------------------------------------------------------------------------------------------------------------------|
|                                                                                       |                 |              | alkaline phosphatase (1 patient), sensory disturbance (1 patient), erythema (1 patient), and pruritus (1 patient)                                                                                                                                                                                                                                               |
|                                                                                       | 50 mg (n=123)   | IM injection | Cardiac arrest (1 patient), liver disorder (1 patient), folliculitis (1 patient), increased white blood cell count (2 patients), increased platelet count (1 patient), positive urinary protein (1 patient), hypocalcemia (1 patient), urinary stones (1 patient), acne (1 patient), subcutaneous hemorrhage (1 patient), and seborrheic dermatitis (1 patient) |
|                                                                                       | Placebo (n=123) | IM injection | Injection site pain (2 patients), liver enzyme elevation (1 patient), allergic dermatitis (1 patient), and urticaria (1 patient)                                                                                                                                                                                                                                |
| Phase III<br>(E0302-J081-762)<br>[147 Japanese].<br>Cut-off Data, 31<br>October 2014* | 50 mg (n=147)   | IM injection | Supraventricular extrasystole (1 patient), gastroesophageal reflux disease (1 patient), positive urinary protein (3 patients), increased blood bilirubin (1 patient), increased blood urea nitrogen (1 patient), urticaria (1 patient), hypertension (2 patients)                                                                                               |

\*: The Continuous treatment period was conducted in subjects who completed Study E0302-J081-761. Aggregate data until the last day of the 52-week assessment obtained by the cut-off date as of October 2014. Urinary stones occurred in one subject as a serious adverse reaction after the last day of Week 52. In addition, no serious side effects were observed in three other clinical studies in ALS.

• **P.52 18.1. Determination of Sample Size**

Reason for change: Error

Before:

2) Endpoints and Estimates Used to Calculate Target Sample Size

In Phase II/III study (E0302-J081-761), an estimate of the change in total ALSFRS-R scores was estimated using data from a subset of patients who experience symptoms for ≤one year at the initiation of the observation period and whose total ALSFRS-R scores decreased by 1-2 points during the observation period (12 weeks). The mean ± SD of the change in ALSFRS-R total score at 16 months was -3.2 ± 4.0 in the mecobalamin 50 mg group (26 patients in the E0302 – 50 mg group in this study) and -5.8 ± 5.0 in the placebo group (n = 32) (mean difference: -2.6).

After:

2) Endpoints and Estimates Used to Calculate Target Sample Size

In Phase II/III study (E0302-J081-761), an estimate of the change in ALSFRS-R total score was estimated using data from a subset of patients who experience symptoms for ≤one year at the initiation of the observation period and whose total ALSFRS-R scores decreased by 1-2 points during the observation period (12 weeks). The mean ± SD of the change in ALSFRS-R total score at 16 weeks was -3.2 ± 4.0 in the mecobalamin 50 mg group (26 patients in the E0302 – 50 mg group in this study) and -5.8 ± 5.0 in the placebo group (n = 32) (mean difference: -2.6).

**Ver2.0 (2018.3.30)**

• **P.9 [Subjects]**

Reason for change: Error

Before:

Eligible patients: Those who meet the following inclusion criteria (1)-(4), (6) and (7) at the initiation of the observation period, and (3) and (5), (7) at the completion of the observation period, and do not meet any of the exclusion criteria (1)-(14) at the initiation of the observation period, and (1)-(4), (7)-(11), (13)-(14) at the completion of the observation period.

After:

Eligible patients: Those who meet the following inclusion criteria (1)-(4), (6) and (7) at the initiation of the observation period, and (3) and (5)-(7) at the completion of the observation period, and do not meet any of the exclusion criteria (1)-(14) at the initiation of the observation period, and (1)-(4), (7)-(11), (13)-(14) at the completion of the observation period.

• **P.9 [Subjects]**

Reason for change: Correction of descriptions

Before:

Exclusion criteria: Patients who meet any one of the following criteria will be excluded.

(6) Patients receiving edaravone within four weeks prior to obtaining informed consent

After:

Exclusion criteria: Patients who meet any one of the following criteria will be excluded.

(6) Patients receiving edaravone within four weeks prior to enrollment in the observation period

• **P.19 4.3. Eligibility Criteria**

Reason for change: Error

Before:

Patients who meet the following inclusion criteria (1)-(4), (6) and (7) at the initiation of the observation period, and (3) and (5), (7) at the completion of the observation period, and do not meet any of the exclusion criteria (1)-(14) at the initiation of the observation period, and (1)-(4), (7)-(11), (13)-(14) at the completion of the observation period are eligible.

After:

Patients who meet the following inclusion criteria (1)-(4), (6) and (7) at the initiation of the observation period, and (3) and (5)-(7) at the completion of the observation period, and do not meet any of the exclusion criteria (1)-(14) at the initiation of the observation period, and (1)-(4), (7)-(11), (13)-(14) at the completion of the observation period are eligible.

• **P.20 4.3.2. Exclusion Criteria**

Reason for change: Correction of descriptions

Before:

Exclusion criteria: Patients who meet any one of the following criteria will be excluded.

(6) Patients receiving edaravone within four weeks prior to obtaining informed consent

After:

Exclusion criteria: Patients who meet any one of the following criteria will be excluded.

(6) Patients receiving edaravone within four weeks prior to enrollment in the observation period

• **P.29 8.2.3. Confirmation of Assignment Status**

Reason for change: Correction of descriptions

Before:

The Medical Statistical Advisor receives reports from the registration center on the status of assignment (subject characteristics by treatment group) masked by the treatment group name as appropriate and, if there is an imbalance in the allocation adjustment factor (minimization factor) and the other important prognostic factors, recommends a change in the method of assignment to the coordinating investigator and the registration center along with the response measures.

After:

The Medical Statistical Advisor receives reports from the registration center on the status of assignment (subject characteristics by treatment group) masked by the treatment group name as appropriate and, if there is an imbalance in the allocation adjustment factor (minimization factor), recommends a change in the method of assignment to the coordinating investigator and the registration center along with the response measures.

• **P.34 9.2.1.1. Observation period Week 0 (Initiation of the observation period)**

Reason for change: Correction of descriptions

Before:

(1) Patient characteristics at the initiation of the observation period

6) History of the present illness

- History of administration of edaravone more than four weeks prior to obtaining informed consent in the observation period (including reasons for switching)

After:

(1) Patient characteristics at the initiation of the observation period

6) History of the present illness

- History of administration of edaravone more than four weeks prior to enrollment in the observation period (including reasons for switching)

• **P.63 18.2.3.2. Data Monitoring**

Reason for change: Correction of descriptions

Before:

The Medical Statistical Advisor will receive a report from the registration center of the allocation status (distribution of subject characteristics by group) with the name of the group, as appropriate. If there is an imbalance in the allocation adjustment factor (minimization factor) and the other important prognostic factors (Continuous amount of variables categorized as minimization factors, such as the total ALSFRS-R score at the end of the observation period and the change in ALSFRS-R during the observation period), the change in the allocation method will be recommended to the coordinating investigator along with the response measures.

After:

The Medical Statistical Advisor will receive a report from the registration center of the allocation status (distribution of subject characteristics by group) with the name of the group, as appropriate. If there is an imbalance in the allocation adjustment factor (minimization factor), the change in the allocation method will be recommended to the coordinating investigator along with the response measures.

**Ver3.0 (2018.7.4)**

• **P.4 TABLE OF CONTENTS**

Reason for change: Correction of descriptions

Before:

6.2.1. Prohibited Concomitant Drugs

After:

6.2.1. Prohibited Concomitant Drugs and Therapy

• **P.14 3.2. Study Flow**

Reason for change: Correction of descriptions

Before:

In the Continuous treatment period, independent evaluation is not required, and safety and efficacy evaluations, surveys, and administration of the investigational product are permitted by the principal investigator and others.

After:

In the Continuous treatment period, independent evaluation is not required, and all evaluations, surveys, and administration of the investigational product are permitted by the principal investigator and others.

• **P.25 5.6.1.1. During the Continuous Treatment Period**

Reason for change: Add the description about the maximum numbers of investigational products prescribed at once

Before:

In the considerations for storing the investigational products at the subject's home (see 5.6.2.1. During the Treatment Period), it is not required to lock if it is self-administered.

After:

In the considerations for storing the investigational products at the subject's home (see 5.6.2.1. During the Treatment Period), it is not required to lock if it is self-administered. If the investigational products are stored at the subject's home, the maximum number of investigational drugs that can be prescribed is 24.

• **P.26 6.2. Concomitant Therapy**

Reason for change: Correction of descriptions

Before:

6.2.1. Prohibited Concomitant Drugs

After:

6.2.1. Prohibited Concomitant Drugs and Therapy

• **P.26 6.2.1. Prohibited Concomitant Drugs and Therapy**

Reason for change: Correction of descriptions

Before:

The following drugs will be prohibited from the initiation of the observation period to Week 16 of the Treatment period or at the time of discontinuation.

- 1) Drugs with Possible Efficacy in ALS (Appendix 2)
- 2) Drugs whose main ingredient is vitamin B12 (excluding topical agents) (Appendix 2)
- 3) Other investigational products, investigational products such as regenerative medicine, and investigational devices

[Rationale]

1) (2) Since this product may affect the evaluation of the efficacy of the investigational product, it was set.

3) Considerations for the safety of subjects were included.

After:

The following drugs will be prohibited from the initiation of the observation period to Week 16 of the Treatment period or at the time of discontinuation, whichever comes first.

- 1) Drugs with Possible Efficacy in ALS (Appendix 2)
- 2) Drugs whose main ingredient is vitamin B12 (excluding topical agents) (Appendix 2)
- 3) Other investigational products, investigational products such as regenerative medicine, and investigational devices

[Rationale]

1) (2) Since this product may affect the evaluation of the efficacy of the investigational product, it was set.

3) Considerations for the safety of subjects were included.

The following therapies are prohibited from the initiation of the observation period to Week 16 of the Treatment period or at the time of discontinuation, whichever comes first.



4) HAL medical leg type (Appendix 2)

• **P.26 6.2.2. Restricted Concomitant Drug**

Reason for change: Correction of descriptions

Before:

However, the daily dose of riluzole should not be changed or administered at the initiation of the observation period until Week 16 of treatment or at the time of discontinuation.

After:

However, the daily dose of riluzole should not be changed or administered at the initiation of the observation period until Week 16 of treatment or at the time of discontinuation, whichever comes first.

• **P.26 6.2.3. Concomitant Therapy**

Reason for change: Correction of descriptions

Before:

1) Rehabilitation can be performed at the initiation of the observation period until Week 16 of treatment or at the time of discontinuation. Active rehabilitation should be provided according to the subject's condition, including exercise and respiratory training to restore muscle strength (see 10.7 Concomitant Medications and Concomitant Therapies). However, the HAL medical leg type is prohibited from the initiation of the observation period to week16 of the Treatment period or at the time of discontinuation, whichever comes first.

2) Nutritional management

Even if nutritional support measures (e.g., nasogastric tube feeding, IVH, or PEG) are administered at the initiation of the observation period until Week 16 of treatment or at the time of discontinuation, a continuation of the study is allowed (see 10.7 Concomitant Medications/Therapies).

After:

1) Rehabilitation can be performed during all periods of the Observation, Treatment, and Continuous treatment periods. Active rehabilitation should be provided according to the subject's condition, including exercise and respiratory training to restore muscle strength (see 10.7 Concomitant Medications and Concomitant Therapies). However, the HAL medical leg type is prohibited from the initiation of the observation period to week16 of the Treatment period or at the time of discontinuation, whichever comes first.

2) Nutritional management

Even if nutritional support measures (e.g., nasogastric tube feeding, IVH, or PEG) are administered during all periods of the Observation, Treatment, and Continuous treatment periods, a continuation of the study is allowed (see 10.7 Concomitant Medications/Therapies).

• **P.33 9.1. Study Schedule**

Reason for change: Correction of descriptions

Before:

| Timing                                   | Observation period                         |                   | Treatment period (double-blinded)              |                                                                               |            |                                      | Continuious treatment period               |                                                               |
|------------------------------------------|--------------------------------------------|-------------------|------------------------------------------------|-------------------------------------------------------------------------------|------------|--------------------------------------|--------------------------------------------|---------------------------------------------------------------|
|                                          | Week 0<br>Initiation                       | 12 weeks<br>(end) | Week 0<br>(Initial day of<br>administration*1) | 4<br>weeks                                                                    | 8<br>weeks | 16 weeks<br>(Completed/Discontinued) | Every 12 weeks<br>(Completed/Discontinued) |                                                               |
| Acceptable range (weeks)                 | —                                          | ±1                | —                                              | ±1                                                                            | ±1         | ±2                                   | ±2                                         |                                                               |
| Tests, observations, and assessments     | Obtainment of written informed consent     | •                 |                                                |                                                                               |            | •*2                                  |                                            |                                                               |
|                                          | Patient Characteristics                    | •                 | •                                              |                                                                               |            |                                      |                                            |                                                               |
|                                          | Registration of the observation period     | •                 |                                                |                                                                               |            |                                      |                                            |                                                               |
|                                          | Enrollment and assignment during the       |                   | •                                              |                                                                               |            |                                      |                                            |                                                               |
|                                          | Diagnosis (including electromyography and  | •*10              | •                                              |                                                                               |            |                                      |                                            |                                                               |
|                                          | Event occurrence*3                         |                   |                                                | ←————→                                                                        |            |                                      |                                            |                                                               |
|                                          | ALSFRS-R                                   | •                 | •                                              |                                                                               | •          | •                                    | •                                          | •                                                             |
|                                          | %FVC                                       | •                 | •                                              |                                                                               | •          | •                                    | •                                          |                                                               |
|                                          | MMTs; handgrip strength testing; Norris    |                   | •*4                                            |                                                                               | •          | •                                    |                                            |                                                               |
|                                          | Blood homocysteine (intensive)             |                   | •                                              |                                                                               |            | •                                    |                                            |                                                               |
|                                          | Clinical Laboratory Tests (Hematology,     | •*5               | •*6                                            |                                                                               | •*7        |                                      | •*7                                        | •                                                             |
|                                          | 12-lead ECG                                | •                 | •*8                                            | •*8,9                                                                         |            |                                      | •*9                                        | •                                                             |
|                                          | Vital signs                                | •                 | •                                              |                                                                               | •          | •                                    | •                                          | •                                                             |
|                                          | Administration of the investigational drug |                   |                                                | With E0302 - 50 mg/dose or placebo<br>Intramuscular injection twice weekly*13 |            |                                      |                                            | E0302 - 50 mg/dose<br>Intramuscular injection twice weekly*13 |
| Treatment conditions for investigational |                                            |                   | ←————→                                         |                                                                               |            |                                      | ←————→                                     |                                                               |
| Tracheostomy status                      |                                            |                   | ←————→                                         |                                                                               |            |                                      | ←————→                                     |                                                               |
| Concomitant medication/treatment         | ←————→                                     |                   | ←————→                                         |                                                                               |            |                                      | ←————→                                     |                                                               |
| Adverse events*3                         | ←————→                                     |                   | ←————→                                         |                                                                               |            |                                      | ←————→                                     |                                                               |

\*1 Conducted from Day 0 (Allocation date) to Day3. \*2 Obtained informed consent from Week 12 to Week 16. \*3 Occurrence of the Event and Adverse event are required to be reported from the last administration date to 28 days later. \*4 Conducted in the eligible patients for the treatment period. \*5 Measurement of serum Vitamin B12 level are conducted. \*6 Women only take a pregnancy test. \*7 Conducted before administration of the investigational product. \*8 QT assessments are conducted before administration of the investigational product if the first administration is on the allocation date. \*9 QT assessments are conducted twice (before administration and 2 hours later after administration). \*10 The results of electromyography and nerve conduction studies conducted in the other medical institutions allowed to be evaluated.

After:

| Timing                               | Observation period                         |                   | Treatment period (double-blinded)              |                                                                               |            |                                      | Continuous treatment period                                   |   |
|--------------------------------------|--------------------------------------------|-------------------|------------------------------------------------|-------------------------------------------------------------------------------|------------|--------------------------------------|---------------------------------------------------------------|---|
|                                      | Week 0<br>Initiation                       | 12 weeks<br>(end) | Week 0<br>(Initial day of<br>administration*1) | 4<br>weeks                                                                    | 8<br>weeks | 16 weeks<br>(Completed/Discontinued) | Every 12 weeks<br>(Completed/Discontinued)                    |   |
| Acceptable range (weeks)             | —                                          | ±1                | —                                              | ±1                                                                            | ±1         | ±2                                   | ±2                                                            |   |
| Tests, observations, and assessments | Obtainment of written informed consent     | •                 |                                                |                                                                               |            | •*2                                  |                                                               |   |
|                                      | Patient Characteristics                    | •                 | •                                              |                                                                               |            |                                      |                                                               |   |
|                                      | Registration of the observation period     | •                 |                                                |                                                                               |            |                                      |                                                               |   |
|                                      | Enrollment and assignment during the       |                   | •                                              |                                                                               |            |                                      |                                                               |   |
|                                      | Diagnosis (including electromyography and  | •*11              | •                                              |                                                                               |            |                                      |                                                               |   |
|                                      | Event occurrence*3                         |                   |                                                | ←—————→                                                                       |            |                                      |                                                               |   |
|                                      | ALSFRS-R                                   | •                 | •                                              |                                                                               | •          | •                                    | •                                                             | • |
|                                      | %FVC                                       | •                 | •                                              |                                                                               | •          | •                                    | •                                                             |   |
|                                      | MMTs; handgrip strength testing; Norris    |                   | •*4                                            |                                                                               | •          | •                                    |                                                               |   |
|                                      | Blood homocysteine (intensive              |                   | •                                              |                                                                               |            | •                                    |                                                               |   |
|                                      | Clinical Laboratory Tests (Hematology,     | •*5               | •*6                                            |                                                                               | •*7        | •*7                                  |                                                               | • |
|                                      | 12-lead ECG                                | •                 | •*8                                            | •*8, 9                                                                        |            | •*9, *10                             |                                                               | • |
|                                      | Vital signs                                | •                 | •                                              |                                                                               | •          | •                                    | •                                                             | • |
|                                      | Administration of the investigational drug |                   |                                                | With E0302 - 50 mg/dose or placebo<br>Intramuscular injection twice weekly*13 |            |                                      | E0302 - 50 mg/dose<br>Intramuscular injection twice weekly*13 |   |
|                                      | Treatment conditions for investigational   |                   |                                                | ←—————→                                                                       |            |                                      |                                                               |   |
| Tracheostomy status                  |                                            |                   | ←—————→                                        |                                                                               |            |                                      |                                                               |   |
| Concomitant medication/treatment     | ←—————→                                    |                   | ←—————→                                        |                                                                               |            |                                      |                                                               |   |
| Adverse events*3                     | ←—————→                                    |                   | ←—————→                                        |                                                                               |            |                                      |                                                               |   |

\*1 Should be conducted from Day 0 (Allocation date) to Day3. \*2 Obtained informed consent from Week 12 to Week 16. \*3 Occurrence of the Event and Adverse event are required to be reported from the last administration date to 28 days later. \*4 Conducted in the eligible patients for the treatment period. \*5 Measurement of serum Vitamin B12 level are conducted. \*6 Women only take a pregnancy test. \*7 Conducted before administration of the investigational product. \*8 QT assessments are conducted before administration of the investigational product if the first administration is on the allocation date. \*9 QT assessments are conducted twice (before administration and 2 hours later after administration). \*10 Conducted from Week 8 to the last administration date of Week 15. \*11 The results of electromyography and nerve conduction studies conducted in the other medical institutions allowed to be evaluated.

**• P.34 9.2.1.1. Observation period Week 0 (Initiation of the observation period)**

Reason for change: Correction of descriptions

Before:

- (1) Patient characteristics at the initiation of the observation period
- 7) Complications
- Diseased under treatment at the initiation of the observation period

After:

- (1) Patient characteristics at the initiation of the observation period
- 7) Complications
- Diseased at the initiation of the observation period

**• P.35 9.2.1.2. Observation period Week 12 (Completion of the observation period)**

Reason for change: Correction of descriptions

Before:

- (2) Efficacy endpoint

7) Concentration of homocysteine in the blood (conducted in the eligible patients for the treatment period)

After:

(2) Efficacy endpoint

7) Concentration of homocysteine in the blood

• **P.36 9.2.2.2. Week 4, 8, 16, and Discontinuation of Study**

Reason for change: Correction of descriptions

Before:

(2) Safety endpoint

2) 12-Lead ECG (performed once between Week 8 and Week 16 of treatment or at the time of discontinuation)

After:

(2) Safety endpoint

2) 12-Lead ECG (performed once between Week 8 of treatment and the last day of treatment at Week 15 or at the time of discontinuation)

• **P.37 10. Evaluation**

Reason for change: Correction of descriptions

Before:

On the basis of the statement in this section, efficacy, ALSFRS, and safety evaluators independently conduct evaluations and surveys until Week 16 of the Treatment period. Independent evaluation is not required during the Continuous treatment period, and all evaluations and investigations of the investigational product are permitted by the investigator and others.

After:

On the basis of the statement in this section, efficacy, ALSFRS, and safety evaluators independently conduct evaluations and surveys until Week 16 of the Treatment period. Independent evaluation is not required during the Continuous treatment period, and all evaluations, investigations, and administration of the investigational product are permitted by the investigator and others.

• **P.42 10.3.2. Electrocardiogram (ECG)**

Reason for change: Correction of descriptions

Before:

During the treatment period, ECG measurements will be performed twice at 1-minute intervals prior to and 2 hours ( $\pm 1$  hour) after dosing, during the first infusion, and between Week 8 ( $\pm 1$  week) and Week 16 (or discontinuation). As far as possible, this ECG measurement should be performed at the same time period, and the patient will be fasted for at least 8 hours prior to the administration on the day of the visit. In addition, the ECG results during the Treatment period will be sent to the Study Coordinating Office. The ECG should be interpreted by a blinded cardiologist. The results of the reading will be forwarded to the investigator etc., as a report. Corrected intervals to be reported by the cardiologist to the principal investigator, etc., shall be QTcB and QTcF.

After:

During the treatment period, ECG measurements will be performed twice at 1-minute intervals prior to and 2 hours ( $\pm 1$  hour) after dosing, during the first infusion, and between Week 8 ( $\pm 1$  week) and Week 15, the last injection (or discontinuation). As far as possible, this ECG measurement should be performed at the same time period, and the patient will be fasted for at least 8 hours prior to the administration on the day of the visit. In addition, the ECG results during the Treatment period will be sent to the Study Coordinating Office. The ECG should be interpreted by a blinded cardiologist. The results of the reading will be forwarded to the investigator etc., as a report. Corrected intervals to be reported by the cardiologist to the principal investigator, etc., shall be QTcB and QTcF.

Electrocardiogram measurements at the time of discontinuation during the Treatment period are to

be performed once, regardless of whether a meal is used. There is also no need to report to a cardiologist.

• **P.48 12.4.1. Reporting of Serious Adverse Events**

Reason for change: Correction of descriptions

Before:

1) The investigator or sub-investigator should provide the head of each medical institution and the coordinating investigator with the primary report (within 24 hours of knowledge: within one working day at the latest), secondary report (within seven days), detailed investigation report, and final report.

After:

1) The investigator or sub-investigator should provide the head of each medical institution and the coordinating investigator with the primary report (within 24 hours of knowledge: within one working day at the latest), secondary report (within seven days; not mandatory if a full report is included in the primary report), detailed investigation report, and final report.

• **P.53 13.1. Criteria for Discontinuation of Study**

Reason for change: Correction of descriptions

Before:

10) Use of prohibited concomitant drugs or therapies during the period from the initiation of the observation period to Week 16 of the Treatment period (refer to "6.2.1 Prohibited Concomitant Drugs").

After:

10) Use of prohibited concomitant drugs or therapies during the period from the initiation of the observation period to Week 16 of the Treatment period (refer to "6.2.1 Prohibited Concomitant Drugs/Treatments" and "6.2.3 Concomitant Therapies").

• **P.66 Study Cost**

Reason for change: Correction of descriptions

Before:

Since this clinical trial applies the non-insurance combined medical care expense system, the health insurance of the examinee is adapted under this system except for the cost related to the administration of the investigational drug. The investigational product will be provided free of charge by the supplier of the investigational product, and the expenses related to the administration of the investigational product will be paid through research funds. In addition, measurements of the concentration of homocysteine in the blood and pregnancy tests are paid through research funds.

After:

Since this clinical trial applies the non-insurance combined medical care expense system, the health insurance of the examinee is adapted under this system except for the cost related to the administration of the investigational drug. The investigational product will be provided free of charge by the supplier of the investigational product, and the expenses related to the administration of the investigational product will be paid through research funds. In addition, measurements of the concentration of homocysteine in the blood and pregnancy tests are paid through research funds.

When paying the clinical trial cooperative expenses, expenses for reducing the burden, etc. to the subjects, these shall be paid in accordance with the provisions of each participating medical organization

**Ver4.0 (2018.11.6)**

• **P.17 4.1. Diagnostic criteria**

Reason for change: Correction of descriptions

Before:

The El Escorial revised Airlie House diagnostic criteria are shown below.<sup>16, 17</sup> Diagnostic flow is shown in Figure 4-1.

-

(3) Clinically probable and laboratory evidence of ALS (clinically probable-laboratory-supported ALS) is defined as clinical signs of upper and lower motor neuron dysfunction in one region together with neurophysiological evidence of lower motor neuron dysfunction in 2 regions.

After:

The El Escorial revised Airlie House diagnostic criteria are shown below.<sup>16, 17</sup>

-

(3) Clinically probable and laboratory evidence of ALS (clinically probable-laboratory-supported ALS) is defined as clinical signs of upper and lower motor neuron dysfunction in one region together with neurophysiological evidence of lower motor neuron dysfunction (Positive sharp wave, Fibrillation potential) in 2 regions.

• **P.18 4.1. ALS diagnostic flow**

Reason for change: Correction of descriptions

Before:

Figure 4-1. ALS diagnostic flow (World Federation of Neurology revised El Escorial criteria 1998)

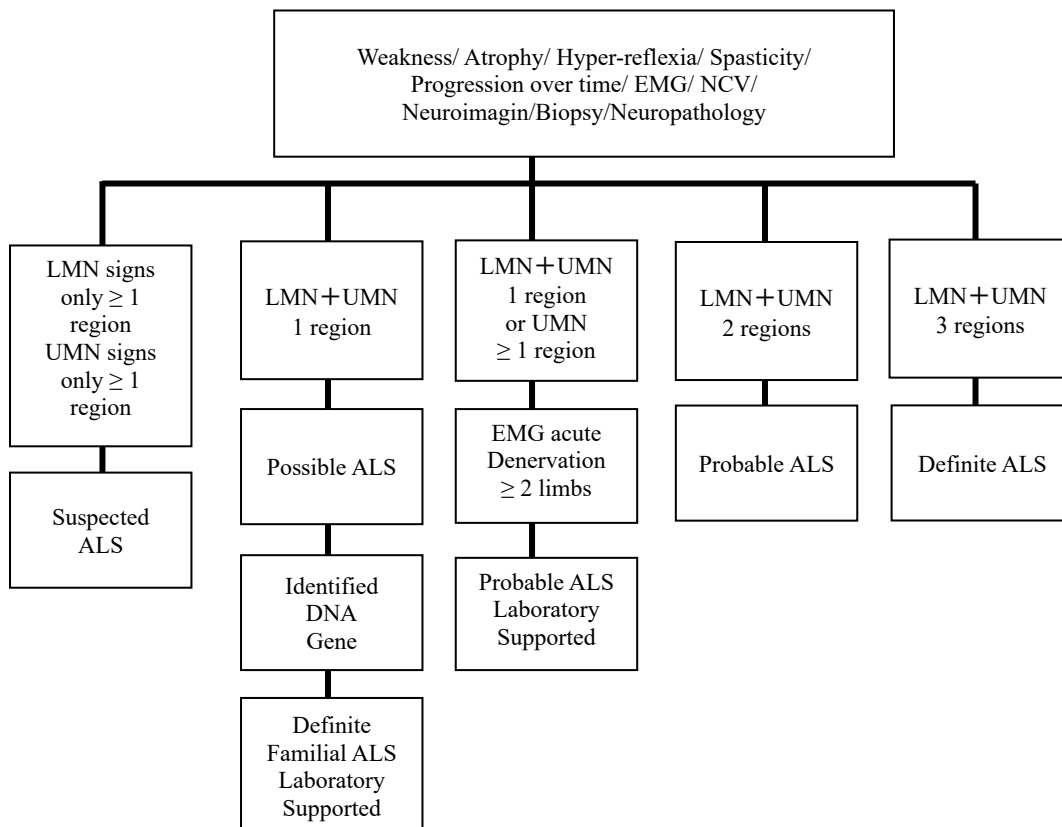

After: Figure I deleted.

• **P.23 5.5.2. Method of Preparation and Administration**

Reason for change: Correction of descriptions

Before:

The investigational drug administrator will administer the investigational drug twice weekly on an outpatient basis in accordance with the instructions for administration provided by the safety assessor. If the subject becomes unable to visit the hospital as an outpatient, the investigational product may be administered by a coordinator, such as a family physician, who has been designated as an investigational product administrator at the subject's home or nearby medical institution.

After:

The investigational drug administrator will administer the investigational drug twice weekly on an outpatient basis in accordance with the instructions for administration provided by the safety assessor. If the subject becomes unable to visit the hospital as an outpatient, the investigational product may be administered by a coordinator, such as a family physician, who has been designated as an investigational product administrator at the subject's home or nearby medical institution. The investigational product will be administered twice weekly during the 7-day period, starting from the initial day of administration in the Treatment period and Continuous treatment period. It is not possible to administer two doses (four vials) during the same day with at least one dosing interval.

• **P.23 7.2. Obtaining Written Informed Consent**

Reason for change: Correction of descriptions

Before:

4) Obtaining consent for the transition to the Continuous treatment period

If the subject wishes to continue treatment, written informed consent will be obtained from the subject or from the witness at Week 16 of the treatment period.

After:

4) Obtaining consent for the transition to the Continuous treatment period

If the subject wishes to continue treatment, written informed consent will be obtained from the subject or from the witness between Week 12 of treatment and the initiation of the Continuous treatment period.

• **P.23 8.2.1. Procedures for Subject Registration and Investigational drug Assignment**

Reason for change: Correction of descriptions

Before:

-

After:

5) The investigator or sub-investigator will promptly enter the required information in the case registration system on the website after confirming the discontinuation and completion of treatment for withdrawals, treatment discontinuations, and patients who have completed the Treatment period respectively.

**• P.32 9. 1. Study Schedule**

Reason for change: Correction of descriptions  
Before:

| Timing                                        | Observation period                                                  |                | Treatment period (double-blinded)        |                                                                         |         |                                   | Continuous treatment period             |
|-----------------------------------------------|---------------------------------------------------------------------|----------------|------------------------------------------|-------------------------------------------------------------------------|---------|-----------------------------------|-----------------------------------------|
|                                               | Week 0 Initiation                                                   | 12 weeks (end) | Week 0 (Initial day of administration*1) | 4 weeks                                                                 | 8 weeks | 16 weeks (Completed/Discontinued) | Every 12 weeks (Completed/Discontinued) |
| Acceptable range (weeks)                      | —                                                                   | ± 1            | —                                        | ± 1                                                                     | ± 1     | —                                 | ± 2                                     |
| Tests, observations, and assessments          | Obtainment of written informed consent                              | ●              |                                          |                                                                         |         | ●*2                               |                                         |
|                                               | Patient Characteristics                                             | ●              | ●                                        |                                                                         |         |                                   |                                         |
|                                               | Registration of the observation period                              | ●              |                                          |                                                                         |         |                                   |                                         |
|                                               | Enrollment and assignment during the Treatment period               |                | ●                                        |                                                                         |         |                                   |                                         |
|                                               | Diagnosis (including electromyography and nerve conduction studies) | ●*11           | ●                                        |                                                                         |         |                                   |                                         |
|                                               | Event occurrence*3                                                  |                |                                          |                                                                         |         |                                   |                                         |
|                                               | ALSFRS-R                                                            | ●              | ●                                        |                                                                         | ●       | ●                                 | ●                                       |
|                                               | %FVC                                                                | ●              | ●                                        |                                                                         | ●       | ●                                 |                                         |
|                                               | MdFT; handgrip strength testing; Norris scale; ALSAQ-40             |                | ●*4                                      |                                                                         | ●       | ●                                 |                                         |
|                                               | Blood homocysteine (intensive measurement)                          |                | ●                                        |                                                                         |         | ●                                 |                                         |
|                                               | Clinical Laboratory Tests (Hematology; Biochemistry; Urine)         | ●*5            | ●*6                                      |                                                                         | ●*7     | ●*7                               | ●                                       |
|                                               | 12-lead ECG                                                         | ●              | ●*8                                      | ●*8,9                                                                   |         | ●*9,10                            | ●                                       |
|                                               | Vital signs                                                         | ●              | ●                                        |                                                                         | ●       | ●                                 | ●                                       |
|                                               | Administration of the investigational drug                          |                |                                          | With E0302 - 50 mg dose or placebo Intramuscular injection twice weekly |         |                                   |                                         |
| Treatment conditions for investigational drug |                                                                     |                |                                          |                                                                         |         |                                   |                                         |
| Tracheostomy status                           |                                                                     |                |                                          |                                                                         |         |                                   |                                         |
| Concomitant medication treatment              |                                                                     |                |                                          |                                                                         |         |                                   |                                         |
| Adverse events*3                              |                                                                     |                |                                          |                                                                         |         |                                   |                                         |

\*1 Should be conducted from Day 0 (Allocation date) to Day3. \*2 Obtained informed consent from Week 12 to Week 16. \*3 Occurrence of the Event and Adverse event are required to be reported from the last administration date to 28 days later. \*4 Conducted in the eligible patients for the treatment period. \*5 Measurement of serum Vitamin B12 level are conducted. \*6 Women only take a pregnancy test. \*7 Conducted before administration of the investigational product. \*8 QT assessment are conducted before administration of the investigational product, if the first administration is on the allocation date. \*9 QT assessment are conducted twice (before administration and 2 hours later after administration). \*10 Conducted from Week 8 to the last administration date of Week 15. \*11 The results of electromyography and nerve conduction studies conducted in the other medical institutions allowed to be evaluated.

After:

| Timing                                        | Observation period                                                  |                | Treatment period (double-blinded)        |                                                                            |         |                                   | Continuous treatment period             |
|-----------------------------------------------|---------------------------------------------------------------------|----------------|------------------------------------------|----------------------------------------------------------------------------|---------|-----------------------------------|-----------------------------------------|
|                                               | Week 0 Initiation                                                   | 12 weeks (end) | Week 0 (Initial day of administration*1) | 4 weeks                                                                    | 8 weeks | 16 weeks (Completed/Discontinued) | Every 12 weeks (Completed/Discontinued) |
| Acceptable range (weeks)                      | —                                                                   | ± 1            | —                                        | ± 1                                                                        | ± 1     | —                                 | ± 2                                     |
| Tests, observations, and assessments          | Obtainment of written informed consent                              | ●              |                                          |                                                                            |         | ●*2                               |                                         |
|                                               | Patient Characteristics                                             | ●              | ●                                        |                                                                            |         |                                   |                                         |
|                                               | Registration of the observation period                              | ●              |                                          |                                                                            |         |                                   |                                         |
|                                               | Enrollment and assignment during the Treatment period               |                | ●                                        |                                                                            |         |                                   |                                         |
|                                               | Diagnosis (including electromyography and nerve conduction studies) | ●*11           | ●                                        |                                                                            |         |                                   |                                         |
|                                               | Event occurrence*3                                                  |                |                                          |                                                                            |         |                                   |                                         |
|                                               | ALSFRS-R*12                                                         | ●              | ●                                        |                                                                            | ●       | ●                                 | ●                                       |
|                                               | %FVC                                                                | ●              | ●                                        |                                                                            | ●       | ●                                 |                                         |
|                                               | MdFT; handgrip strength testing; Norris scale; ALSAQ-40             |                | ●*4                                      |                                                                            | ●       | ●                                 |                                         |
|                                               | Blood homocysteine (intensive measurement)                          |                | ●                                        |                                                                            |         | ●                                 |                                         |
|                                               | Clinical Laboratory Tests (Hematology; Biochemistry; Urine)         | ●*5            | ●*6                                      |                                                                            | ●*7     | ●*7                               | ●                                       |
|                                               | 12-lead ECG                                                         | ●              | ●*8                                      | ●*8,9                                                                      |         | ●*9,10                            | ●                                       |
|                                               | Vital signs                                                         | ●              | ●                                        |                                                                            | ●       | ●                                 | ●                                       |
|                                               | Administration of the investigational drug                          |                |                                          | With E0302 - 50 mg dose or placebo Intramuscular injection twice weekly*13 |         |                                   |                                         |
| Treatment conditions for investigational drug |                                                                     |                |                                          |                                                                            |         |                                   |                                         |
| Tracheostomy status                           |                                                                     |                |                                          |                                                                            |         |                                   |                                         |
| Concomitant medication treatment *12          |                                                                     |                |                                          |                                                                            |         |                                   |                                         |
| Adverse events*3                              |                                                                     |                |                                          |                                                                            |         |                                   |                                         |

\*1 Should be conducted from Day 0 (Allocation date) to Day3. \*2 Obtained informed consent from Week 12 to Week 16. \*3 Occurrence of the Event and Adverse event are required to be reported from the last administration date to 28 days later. \*4 Conducted in the eligible patients for the treatment period. \*5 Measurement of serum Vitamin B12 level are conducted. \*6 Women only take a pregnancy test. \*7 Conducted before administration of the investigational product. \*8 QT assessment are conducted before administration of the investigational product, if the first administration is on the allocation date. \*9 QT assessment are conducted twice (before administration and 2 hours later after administration). \*10 Conducted from Week 8 to the last administration date of Week 15. \*11 The results of electromyography and nerve conduction studies conducted in the other medical institutions allowed to be evaluated. \*12 Among the patients enrolled in the treatment phase, ALSFRS-R evaluation and investigation of concomitant medication and concomitant therapy will be conducted as much as possible until Week 16 of the treatment phase for the discontinued patients except for the untreated patients (except for those who refuse to continue participation in the study or withdraw consent). \*13 For twice-weekly administration of the study drug, the drug will be administered twice during a 7-day period starting from the start date of the treatment continuation period. The interval between doses should be at least one day, and two doses (4 vials) on the same days is not allowed.



• **P.35 9.2.1.2. Observation period Week 12 (Completion of the observation period)**

Reason for change: Correction of descriptions

Before:

- (2) Efficacy endpoint
- 1 ) ALSFRS-R
  - 2 ) %FVC
  - 3 ) MMT
  - 4 ) Grip strength test
  - 5) Norris scale
  - 6) ALSAQ 40
  - 7) Concentration of homocysteine in the blood

After:

- (2) Efficacy endpoint
- 1) ALSFRS-R
  - 2) %FVC
  - 3) MMT (performed only eligible for treatment)
  - 4) Grip strength test (performed only in eligible patients for treatment)
  - 5) Norris scale (performed only for eligible patients in the treatment period)
  - 6) ALSAQ 40 (performed only in eligible patients for treatment)
  - 7) Concentration of homocysteine in the blood

• **P.53 13.2. Procedures for Discontinuation of Study**

Reason for change: Correction of descriptions

Before:

-

After:

Among patients enrolled in the treatment period, ALSFRS-R evaluations and investigations of concomitant drugs/therapies will be performed as much as possible until Week 16 of the Treatment period unless patients discontinued from the Treatment period, excluding patients who have not received treatment unless they refuse to continue participation in the study or have requested to withdraw consent. If ambulatory is difficult, the ALSFRS-R will be assessed by a telephone survey, and concomitant medications/therapies will be surveyed in reference to the ALSFRS-R telephone survey flow diagram.

• **P.60 18.2.1.6. Handling of Data**

Reason for change: Correction of descriptions

Before:

- 7) Handling of Discontinuation Cases

Discontinuations will be censored on the day of discontinuation. In addition, if an event occurs within 28 days of the last day of administration of the investigational product (the last day of administration of the investigational product is day 0) in a patient who is withdrawn from the study, the efficacy data measured after the event will be analyzed.

After:

- 7) Handling of Discontinuation Cases

Discontinuations will be censored on the day of discontinuation. However, ALSFRS-R evaluations and investigations of concomitant drugs/therapies will be performed as much as possible until Week 16 of the Treatment period for the patients enrolled in the Treatment period, but not those who discontinued from the Treatment period unless they refuse to continue participation in the study or have requested to withdraw consent. In addition, if an event occurs within 28 days of the last day of administration of

the investigational product (the last day of administration of the investigational product is day 0) in a patient who is withdrawn from the study, the efficacy data measured after the event will be analyzed.

**Ver4.1 (2019.2.6)**

• **P.53 13.2. Procedures for Discontinuation of Study**

Reason for change: Correction of descriptions

Before:

The investigator or sub-investigator should promptly inform the subject of the termination of the study and provide appropriate medical care and take other necessary measures. The predetermined parameters at the time of discontinuation will be investigated and evaluated within two weeks of the day of administration immediately prior to discontinuation (within four weeks after the day of discontinuation if discontinuation occurs due to withdrawal of at least 15 days). In addition, the date of discontinuation (the day on which the physician judged the discontinuation) and the reason thereof are recorded in the Case Report Form.

After:

The investigator or sub-investigator should promptly inform the subject of the termination of the study and provide appropriate medical care and take other necessary measures. The predetermined parameters at the time of discontinuation (the day on which the physician judged the discontinuation) and the reason thereof is recorded in the Case Report Form. The predetermined parameters will be investigated and evaluated after the last dose of the investigational drug and within  $\pm 2$  weeks from the date of discontinuation.

**Ver5.0 (2019.4.24)**

• **P.53 13.2. Procedures for Discontinuation of Study**

Reason for change: Correction of descriptions

Before:

In this study, when ambulatory visits are difficult due to the patient's reasons, such as the reason for progression of the underlying disease during the Continuous treatment period, because of the patient's health status, etc., administration of the investigational product at the subject's home (self-administration) may be performed by subjects or their families trained in the administration of the investigational product in addition to the administration at the subject's home or nearby medical institutions. In the considerations for storing the investigational products at the subject's house (see "5.6.2.1. During the Treatment Period"), it is not required to lock if it is self-administered. If the investigational products are stored at the subject's home, the maximum number of investigational drugs that can be prescribed is 24.

After:

In this study, when ambulatory visits are difficult due to the patient's reasons, such as the reason for progression of the underlying disease during the Continuous treatment period, because of the patient's health status, etc., administration of the investigational product at the subject's home (self-administration) may be performed by subjects or their families trained in the administration of the investigational product in addition to the administration at the subject's home or nearby medical institutions. In the considerations for storing the investigational products at the subject's house (see "5.6.2.1. During the Treatment Period"), it is not required to lock if it is self-administered. If the investigational products are stored at the subject's home, the maximum number of investigational drugs that can be prescribed is 28.

• **P.53 9.1. Study schedule**

Reason for change: Correction of descriptions

Before:

Table 9-1 Study Schedule

| Timing                               | Observation period                                                  |                | Treatment period (double-blinded)        |                                                                            |         |                                   | Continous treatment period              |                                                            |  |
|--------------------------------------|---------------------------------------------------------------------|----------------|------------------------------------------|----------------------------------------------------------------------------|---------|-----------------------------------|-----------------------------------------|------------------------------------------------------------|--|
|                                      | Week 0 Initiation                                                   | 12 weeks (end) | Week 0 (Initial day of administration*1) | 4 weeks                                                                    | 8 weeks | 16 weeks (Completed/Discontinued) | Every 12 weeks (Completed/Discontinued) |                                                            |  |
| Acceptable range (weeks)             | —                                                                   | ± 1            | —                                        | ± 1                                                                        | ± 1     | —                                 | ± 2                                     |                                                            |  |
| Tasks, observations, and assessments | Obtainment of written informed consent                              | ●              |                                          |                                                                            |         | ●*2                               |                                         |                                                            |  |
|                                      | Patient Characteristics                                             | ●              | ●                                        |                                                                            |         |                                   |                                         |                                                            |  |
|                                      | Registration of the observation period                              | ●              |                                          |                                                                            |         |                                   |                                         |                                                            |  |
|                                      | Enrollment and assignment during the Treatment period               |                | ●                                        |                                                                            |         |                                   |                                         |                                                            |  |
|                                      | Diagnosis (including electromyography and nerve conduction studies) | ●*11           | ●                                        |                                                                            |         |                                   |                                         |                                                            |  |
|                                      | Event occurrence*3                                                  |                |                                          |                                                                            |         |                                   |                                         |                                                            |  |
|                                      | ALSFRS-R*12                                                         | ●              | ●                                        |                                                                            | ●       | ●                                 | ●                                       | ●                                                          |  |
|                                      | %FVC                                                                | ●              | ●                                        |                                                                            | ●       | ●                                 | ●                                       | ●                                                          |  |
|                                      | MMTb; handgrip strength testing; Norris scale; ALSAQ-40             |                | ●*4                                      |                                                                            | ●       | ●                                 | ●                                       | ●                                                          |  |
|                                      | Blood homocysteine (intensive measurement)                          |                | ●                                        |                                                                            |         | ●                                 | ●                                       | ●                                                          |  |
|                                      | Clinical Laboratory Tests (Hematology; Biochemistry; Urine)         | ●*5            | ●*6                                      |                                                                            | ●*7     |                                   | ●*7                                     | ●                                                          |  |
|                                      | 12-lead ECG                                                         | ●              | ●*8                                      | ●*8,9                                                                      | ●       | ●                                 | ●*9,*10                                 | ●                                                          |  |
|                                      | Vital signs                                                         | ●              | ●                                        |                                                                            | ●       | ●                                 | ●                                       | ●                                                          |  |
|                                      | Administration of the investigational drug                          |                |                                          | With E0302 - 50 mg/dose or placebo Intramuscular injection twice weekly*13 |         |                                   |                                         | E0302 - 50 mg/dose Intramuscular injection twice weekly*13 |  |
|                                      | Treatment conditions for investigational drug                       |                |                                          |                                                                            |         |                                   |                                         |                                                            |  |
| Tracheostomy status                  |                                                                     |                |                                          |                                                                            |         |                                   |                                         |                                                            |  |
| Concomitant medication/treatment *12 |                                                                     |                |                                          |                                                                            |         |                                   |                                         |                                                            |  |
| Adverse events*3                     |                                                                     |                |                                          |                                                                            |         |                                   |                                         |                                                            |  |

\*1 Should be conducted from Day 0 (Allocation date) to Day3. \*2 Obtained informed consent from Week 12 to Week 16. \*3 Occurrence of the Event and Adverse event are required to be reported from the last administration date to 28 days later. \*4 Conducted in the eligible patients for the treatment period. \*5 Measurement of serum Vitamin B12 level are conducted. \*6 Women only take a pregnancy test. \*7 Conducted before administration of the investigational product. \*8 QT assessment are conducted before administration of the investigational product, if the first administration is on the allocation date. \*9 QT assessment are conducted twice (before administration and 2 hours later after administration). \*10 Conducted from Week 8 to the last administration date of Week 15. \*11 The results of electromyography and nerve conduction studies conducted in the other medical institutions allowed to be evaluated. \*12 Among the patients enrolled in the treatment phase, ALSFRS-R evaluation and investigation of concomitant medication and concomitant therapy will be conducted as much as possible until Week 16 of the treatment phase for the discontinued patients except for the untreated patients (except for those who refuse to continue participation in the study or withdraw consent). \*13 For twice-weekly administration of the study drug, the drug will be administered twice during a 7-day period starting from the start date of the treatment/continuation period. The interval between doses should be at least one day, and two doses (4 vials) on the same days not allowed.

After:  
Table 9-1 Study Schedule

| Timing                               | Observation period                                                  |                | Treatment period (double-blinded)        |                                                                            |         |                                   | Continous treatment period              |                                                            | Discontinuation (Treatment period/Continous treatment period) |
|--------------------------------------|---------------------------------------------------------------------|----------------|------------------------------------------|----------------------------------------------------------------------------|---------|-----------------------------------|-----------------------------------------|------------------------------------------------------------|---------------------------------------------------------------|
|                                      | Week 0 Initiation                                                   | 12 weeks (end) | Week 0 (Initial day of administration*1) | 4 weeks                                                                    | 8 weeks | 16 weeks (Completed/Discontinued) | Every 12 weeks (Completed/Discontinued) |                                                            |                                                               |
| Acceptable range (weeks)             | —                                                                   | ± 1            | —                                        | ± 1                                                                        | ± 1     | —                                 | ± 2                                     | ± 7/14                                                     |                                                               |
| Tasks, observations, and assessments | Obtainment of written informed consent                              | ●              |                                          |                                                                            |         | ●*2                               |                                         |                                                            |                                                               |
|                                      | Patient Characteristics                                             | ●              | ●                                        |                                                                            |         |                                   |                                         |                                                            |                                                               |
|                                      | Registration of the observation period                              | ●              |                                          |                                                                            |         |                                   |                                         |                                                            |                                                               |
|                                      | Enrollment and assignment during the Treatment period               |                | ●                                        |                                                                            |         |                                   |                                         |                                                            |                                                               |
|                                      | Diagnosis (including electromyography and nerve conduction studies) | ●*11           | ●                                        |                                                                            |         |                                   |                                         |                                                            |                                                               |
|                                      | Event occurrence*3                                                  |                |                                          |                                                                            |         |                                   |                                         |                                                            |                                                               |
|                                      | ALSFRS-R*12                                                         | ●              | ●                                        |                                                                            | ●       | ●                                 | ●                                       | ●                                                          |                                                               |
|                                      | %FVC                                                                | ●              | ●                                        |                                                                            | ●       | ●                                 | ●                                       | ●                                                          |                                                               |
|                                      | MMTb; handgrip strength testing; Norris scale; ALSAQ-40             |                | ●*4                                      |                                                                            | ●       | ●                                 | ●                                       | ●                                                          |                                                               |
|                                      | Blood homocysteine (intensive measurement)                          |                | ●                                        |                                                                            |         |                                   | ●                                       | ●                                                          |                                                               |
|                                      | Clinical Laboratory Tests (Hematology; Biochemistry; Urine)         | ●*5            | ●*6                                      |                                                                            | ●*7     |                                   | ●*7                                     | ●                                                          |                                                               |
|                                      | 12-lead ECG                                                         | ●              | ●*8                                      | ●*8,9                                                                      | ●       | ●                                 | ●*9,*10                                 | ●                                                          |                                                               |
|                                      | Vital signs                                                         | ●              | ●                                        |                                                                            | ●       | ●                                 | ●                                       | ●                                                          |                                                               |
|                                      | Administration of the investigational drug                          |                |                                          | With E0302 - 50 mg/dose or placebo Intramuscular injection twice weekly*13 |         |                                   |                                         | E0302 - 50 mg/dose Intramuscular injection twice weekly*13 |                                                               |
|                                      | Treatment conditions for investigational drug                       |                |                                          |                                                                            |         |                                   |                                         |                                                            |                                                               |
| Tracheostomy status                  |                                                                     |                |                                          |                                                                            |         |                                   |                                         |                                                            |                                                               |
| Concomitant medication/treatment *12 |                                                                     |                |                                          |                                                                            |         |                                   |                                         |                                                            |                                                               |
| Adverse events*3                     |                                                                     |                |                                          |                                                                            |         |                                   |                                         |                                                            |                                                               |

\*1 Should be conducted from Day 0 (Allocation date) to Day3. \*2 Obtained informed consent from Week 12 to Week 16. \*3 Occurrence of the Event and Adverse event are required to be reported from the last administration date to 28 days later. \*4 Conducted in the eligible patients for the treatment period. \*5 Measurement of serum Vitamin B12 level are conducted. \*6 Women only take a pregnancy test. \*7 Conducted before administration of the investigational product. \*8 QT assessment are conducted before administration of the investigational product, if the first administration is on the allocation date. \*9 QT assessment are conducted twice (before administration and 2 hours later after administration). \*10 Conducted from Week 8 to the last administration date of Week 15. \*11 The results of electromyography and nerve conduction studies conducted in the other medical institutions allowed to be evaluated. \*12 Among the patients enrolled in the treatment phase, ALSFRS-R evaluation and investigation of concomitant medication and concomitant therapy will be conducted as much as possible until Week 16 of the treatment phase for the discontinued patients except for the untreated patients (except for those who refuse to continue participation in the study or withdraw consent). \*13 For twice-weekly administration of the study drug, the drug will be administered twice during a 7-day period starting from the start date of the treatment/continuation period. The interval between doses should be at least one day, and two doses (4 vials) on the same day is not allowed. \*14 Performed after last administration of the investigational drug and within ± 2 weeks from the discontinuation date.

**Ver6.0 (2019.12.27)**

**• P.9 Sample Size and Duration**

Reason for change: Extension of the continuous treatment period

Before:

The target number of subjects: 128 (64 in the placebo group and 64 in the E0302 - 50 mg group)

Planned study period: October 2017 to March 2020 (planned)

Planned period for case registration: October 2017 to September 2019 (scheduled)

Period for each subject: From the date of obtainment of informed consent to Week 16 of the Treatment period (subjects wishing to continue treatment beyond Week 16 move to the Continuous treatment period until March 2020) after obtaining informed consent.

After:

The target number of subjects: 128 (64 in the placebo group and 64 in the E0302 - 50 mg group)

Planned study period: October 2017 to March 2022 (planned)

(If no significant difference is found in the primary endpoint, the study will be terminated at that time.)

Planned period for case registration: October 2017 to October 2019 (scheduled)

Period for each subject: From the date of obtainment of informed consent to Week 16 of the Treatment period (subjects wishing to continue treatment beyond Week 16 move to the Continuous treatment period until March 2022) after obtaining informed consent.

**• P.10 Design of clinical trials**

Reason for change: Extension of the continuous treatment period

Before:

Target: Sporadic or familial ALS

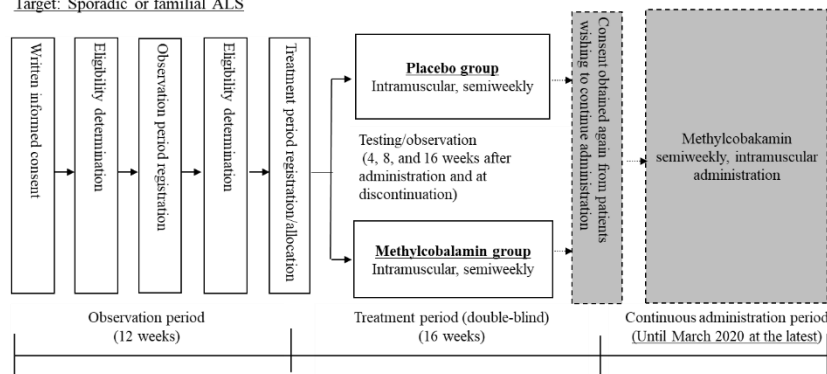

After:

Target: Sporadic or familial ALS

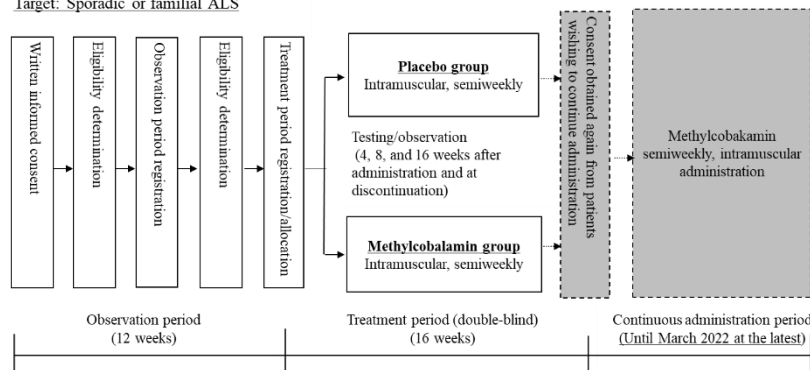

• **P.10 Dosage and method of administration**

Reason for change: Extension of the continuous treatment period

Before:

E0302 - 50 mg or placebo will be administered intramuscularly twice weekly from the initial day of administration until the completion of the 16-week treatment period.

Subjects who wish to continue treatment beyond Week 16 of the Treatment period will enter the Continuous treatment period and receive an intramuscular dose of E0302 - 50 mg until March 2020.

After:

E0302 - 50 mg or placebo will be administered intramuscularly twice weekly from the initial day of administration until the completion of the 16-week treatment period.

Subjects who wish to continue treatment beyond Week 16 of the Treatment period will enter the Continuous treatment period and receive an intramuscular dose of E0302 - 50 mg until March 2022.

• **P.13 2. HISTORY OF DEVELOPMENT (BACKGROUND INFORMATION)**

Reason for change: Extension of the continuous treatment period

Before:

On the basis of the results of Phase II/III study conducted by Eisai Co., Ltd., we planned to perform a multicenter, randomized, placebo-controlled, double-blinded, parallel-group study with the primary endpoint of change in the ALSFRS-R total scores from the date of allocation to Week 16. The study will include patients with ALS who had developed ALS within one year after the onset of symptoms at the initiation of the observation period and had a 1-2-point decrease in the total ALSFRS-R score during the observation period (12 weeks). In addition, subjects who wish to continue treatment beyond Week 16 of the Treatment period were allowed to continue treatment with E0302 - 50 mg by moving to the Continuous treatment period until March 2020.

After:

On the basis of the results of Phase II/III study conducted by Eisai Co., Ltd., we planned to perform a multicenter, randomized, placebo-controlled, double-blinded, parallel-group study with the primary endpoint of change in the ALSFRS-R total score from the date of allocation to Week 16. The study will include patients with ALS who had developed ALS within one year after the onset of symptoms at the initiation of the observation period and had a 1-2-point decrease in the total ALSFRS-R score during the observation period (12 weeks). In addition, subjects who wish to continue treatment beyond Week 16 of the Treatment period were allowed to continue treatment with E0302 - 50 mg by moving to the Continuous treatment period until March 2022.

• **P.14 3.2. Study Flow**

Reason for change: Extension of the continuous treatment period

Before:

Figure 3-1 Schematic of Study Conduct

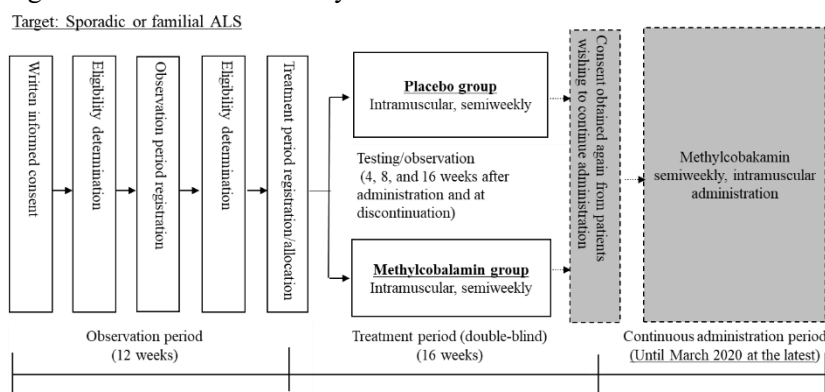

After:  
Figure 3-1 Schematic of Study Conduct

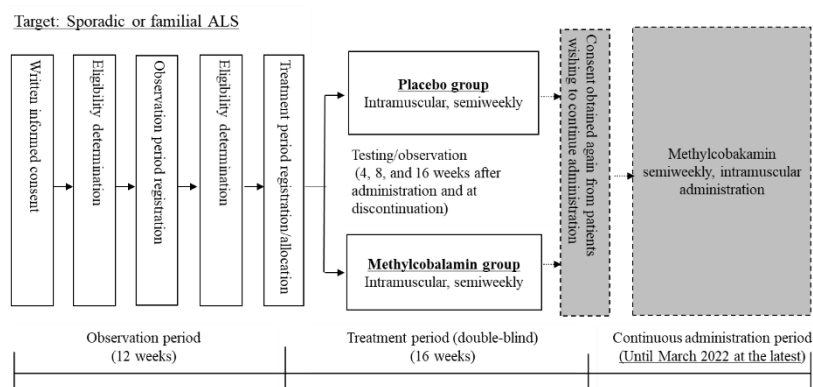

• **P.15 3.4. Sample Size and Study Period**

Reason for change: Extension of the continuous treatment period

Before:

The target number of subjects: 128 (64 in the placebo group and 64 in the E0302 - 50 mg group)

Study period: October 2017 to March 2020 (planned)

Case registration period: October 2017 to September 2019 (scheduled)

Period for each subject: From the date of informed consent obtainment to Week 16 of the Treatment period (subjects wishing to continue treatment beyond Week 16 move to the Continuous treatment period until March 2020) after obtaining informed consent.

After:

The target number of subjects: 128 (64 in the placebo group and 64 in the E0302 - 50 mg group)

Study period: October 2017 to March 2022 (planned)

(If no significant difference is found in the primary endpoint, the study will be terminated at that time.)

Case registration period: October 2017 to October 2019 (planned)

Period for each subject: From the date of informed consent obtainment to Week 16 of the Treatment period (subjects wishing to continue treatment beyond Week 16 move to the Continuous treatment period until March 2022) after obtaining informed consent.

• **P.22 5.5.1. Dose and Administration Method**

Reason for change: Extension of the continuous treatment period

Before:

E0302 - 50 mg or placebo will be administered intramuscularly twice weekly from the initial day of administration until Week 16 of the Treatment period.

For subjects who wish to enter the Continuous treatment period after the completion of the Treatment period, E0302 - 50 mg will be administered intramuscularly twice weekly from the initial day of the Continuous treatment period until March 2020.

After:

E0302 - 50 mg or placebo will be administered intramuscularly twice weekly from the initial day of administration until Week 16 of the Treatment period.

For subjects who wish to enter the Continuous treatment period after the completion of the Treatment period, E0302 - 50 mg will be administered intramuscularly twice weekly from the initial day of the Continuous treatment period until March 2022.

• **P.22 5.5.3. Treatment Period**

Reason for change: Extension of the continuous treatment period

Before:

The Treatment period is 16 weeks (4 months). In addition, if the subject wishes, the Extension may be continued until March 2020 as the Continuous treatment period.

Even during the Continuous treatment period, treatment will be discontinued at the time of the event.

[Rationale for the setting of dosing period]

In the analysis of the subgroup of Phase II/III study, the difference in the change in the ALSFRS-R total score at four weeks (95% confidence interval) was 0.4 (-0.7, 1.5), which was not significantly different ( $P = 0.258$ ), but the difference in the change in the ALSFRS-R total score at 16 weeks (95% confidence interval) was 3.3 (0.5, 6.0), which was significant ( $P = 0.017$ ).

On the other hand, a decrease in the ALSFRS-R total score at 100 days of observation has been reported to be helpful in predicting survival.<sup>20</sup> ALSFRS-R assessment at 16 weeks may be predictive of clinically significant survival.

Therefore, it was deemed appropriate to have a 16-week evaluation period, and a shorter 4-week evaluation period would be difficult. Since this study is a placebo-controlled study in subjects with ALS, the Treatment period was set at 16 weeks in order to shorten the placebo administration period as much as possible due to ethical considerations. The extended administration was allowed until March 2020 (Continuous treatment period).

After:

The Treatment period is 16 weeks (4 months). In addition, if the subject wishes, the Extension may be continued until March 2022 as the Continuous treatment period.

Even during the Continuous treatment period, treatment will be discontinued at the time of the event.

[Rationale for the setting of dosing period]

In the analysis of the subgroup of Phase II/III study, the difference in the change in the ALSFRS-R total score at four weeks (95% confidence interval) was 0.4 (-0.7, 1.5), which was not significantly different ( $P = 0.258$ ), but the difference in the change in the ALSFRS-R total score at 16 weeks (95% confidence interval) was 3.3 (0.5, 6.0), which was significant ( $P = 0.017$ ).

On the other hand, a decrease in the ALSFRS-R total score at 100 days of observation has been reported to be helpful in predicting survival.<sup>20</sup> ALSFRS-R assessment at 16 weeks may be predictive of clinically significant survival.

Therefore, it was deemed appropriate to have a 16-week evaluation period, and a shorter 4-week evaluation period would be difficult. Since this study is a placebo-controlled study in subjects with ALS, the Treatment period was set at 16 weeks in order to shorten the placebo administration period as much as possible due to ethical considerations. The extended administration was allowed until March 2022 (Continuous treatment period).

• **P.22 22.1. Disclosure and Confidentiality**

Reason for change: Add the new funding source

Before:

This clinical trial is adopted in "Research Project for Practical Application of Intractable Diseases" of the National Research and Development Corporation of Japan (AMED) and performed in part using public research funds. Investigational products will be provided free of charge by the supplier of the investigational product. The supplier will not influence the results of this study. The investigator or sub-investigator will not distort his/her professional judgment in the conduct or reporting of the study for financial or other personal benefits. Clinical trials are conducted fairly, and the interests of the manufacturers of products and drugs used in clinical trials are appropriately managed in accordance with the Conflict of Interest Rules of the participating medical organizations.

After:

This clinical trial is adopted in "Research Project for Practical Application of Intractable Diseases" of the National Research and Development Corporation of Japan (AMED) and performed in part

using public research funds. Investigational products will be provided free of charge by the supplier of the investigational product. The supplier will not influence the results of this study. This trial will also be funded by Eisai Co., Ltd. from April 2020 onwards. The investigator or sub-investigator will not distort his/her professional judgment in the conduct or reporting of the study for financial or other personal benefits. Clinical trials are conducted fairly, and the interests of the manufacturers of products and drugs used in clinical trials are appropriately managed in accordance with the Conflict of Interest Rules of the participating medical organizations.

**Ver7.0 (2020.6.26)**

**• P.25 5.6.2.2. During the Continuous Treatment Period**

Reason for change: Add the procedures how to deal with COVID-19

Before:

In this study, when ambulatory visits are difficult due to the patient's reasons, such as the reason for progression of the underlying disease during the Continuous treatment period, because of the patient's health status, etc., administration of the investigational product at the subject's home (self-administration) may be performed by subjects or their families trained in the administration of the investigational product in addition to the administration at the subject's home or nearby medical institutions. In the considerations for storing the investigational products at the subject's house (see "5.6.2.1. During the Treatment Period"), it is not required to lock if it is self-administered. If the investigational products are stored at the subject's home, the maximum number of investigational drugs that can be prescribed is 28.

After:

In this study, when ambulatory visits are difficult due to the patient's reasons, such as the reason for progression of the underlying disease during the Continuous treatment period, because of the patient's health status, etc., administration of the investigational product at the subject's home (self-administration) may be performed by subjects or their families trained in the administration of the investigational product in addition to the administration at the subject's home or nearby medical institutions. In the considerations for storing the investigational products at the subject's house (see "5.6.2.1. During the Treatment Period"), it is not required to lock if it is self-administered. If the investigational products are stored at the subject's home, the maximum number of investigational drugs that can be prescribed is 28.

If the effects of the new coronavirus infection force us to take measures that differ from the provisions of the study protocol and standard procedures, we shall follow the "Procedures for Conducting a Clinical Trial under the Influence of a New Coronavirus Infection," which is provided separately, while placing the highest priority on ensuring the safety of subjects. In providing the investigational drug for administration at the subject's home, the subject may use an investigational drug delivery company to have the medication delivered directly to his/her home. With regard to the delivery of the investigational drug to the subject's home, the investigational drug shall be given to the subject without fail in accordance with the "Procedures for Transporting Investigational Drugs to the Subject's Home" separately specified, with due attention to personal information management.



2702
