# Supplementary material
Source: PubMed Central journal article supplement (PMC9086935)
Supplement: jamaneurol-e220901-s002.pdf [file jamaneurol-e220901-s002.pdf]

**Confidential**

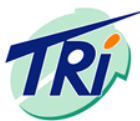

# Japanese Early-stage Trial of high-dose methylcobalamin for Amyotrophic Lateral Sclerosis (JETALS)

## Investigator-Initiated Clinical Trials (Protocol Number: E0302-TOK-763)

Statistical Analysis Plan (Draft)  
Statistical analysis plan  
Version 2.1

Date: 24 March 2020

Supervisor for statistical analysis: Tatsuo Kagimura

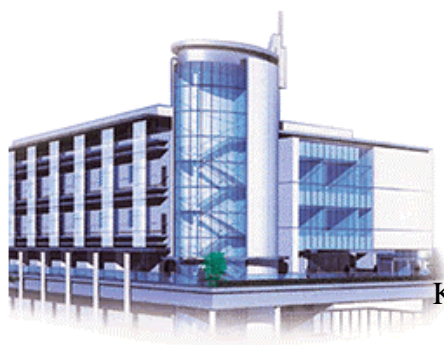

Kobe Medical Industry and Urban Promotion Organization  
Medical Innovation Promotion Center

Translational Research Center for Medical Innovation 37  
Founded in 2003 by MEXT & Kobe City 38  
For acceleration of translational research in Japan 39  
40

43 **Contents**

|    |       |                                                                             |                                     |
|----|-------|-----------------------------------------------------------------------------|-------------------------------------|
| 44 | 1     | Basic analysis-related content.....                                         | 5                                   |
| 45 | 1.1   | Objectives and Research Question of the study.....                          | 5                                   |
| 46 | 1.2   | Schema.....                                                                 | 6                                   |
| 47 | 1.3   | Summary of studies.....                                                     | 7                                   |
| 48 | 1.4   | Data storage location.....                                                  | 10                                  |
| 49 | 1.5   | Analysis software.....                                                      | 10                                  |
| 50 | 2     | Analysis purpose.....                                                       | 11                                  |
| 51 | 2.1   | Changes in Analytical Procedures from the Protocol.....                     | 11                                  |
| 52 | 3     | Analysis Sets.....                                                          | 13                                  |
| 53 | 3.1   | Full Analysis Set (FAS).....                                                | 13                                  |
| 54 | 3.2   | Protocol-compliant population (PPS).....                                    | 13                                  |
| 55 | 3.3   | Significant protocol deviations.....                                        | 13                                  |
| 56 | 4     | Definition of endpoints.....                                                | 13                                  |
| 57 | 4.1   | Efficacy endpoint.....                                                      | 14                                  |
| 58 | 4.1.1 | Primary endpoint.....                                                       | 14                                  |
| 59 | 4.1.2 | Secondary endpoint.....                                                     | 14                                  |
| 60 | 4.1.3 | Time-to event.....                                                          | 14                                  |
| 61 | 4.1.4 | %FVC changes.....                                                           | 14                                  |
| 62 | 4.1.5 | Blood homocysteine level changes.....                                       | 14                                  |
| 63 | 4.1.6 | MMT total score changes.....                                                | 15                                  |
| 64 | 4.1.7 | Grip strength changes (right and left).....                                 | 15                                  |
| 65 | 4.1.8 | Sum of Norris scale changes.....                                            | 15                                  |
| 66 | 4.1.9 | ALSAQ 40 total score changes.....                                           | 15                                  |
| 67 | 4.2   | Other Efficacy Endpoints.....                                               | 15                                  |
| 68 | 4.3   | Safety endpoint.....                                                        | 15                                  |
| 69 | 4.3.1 | Adverse events.....                                                         | 15                                  |
| 70 | 4.3.2 | Laboratory evidence.....                                                    | 16                                  |
| 71 | 4.3.3 | Vital signs.....                                                            | 16                                  |
| 72 | 4.3.4 | Electrocardiogram.....                                                      | 16                                  |
| 73 | 4.4   | Other items.....                                                            | 16                                  |
| 74 | 4.4.1 | Allocation regulator.....                                                   | <b>Error! Bookmark not defined.</b> |
| 75 | 4.4.2 | Important prognostic factor.....                                            | <b>Error! Bookmark not defined.</b> |
| 76 | 5     | Data handling.....                                                          | 18                                  |
| 77 | 5.1.1 | Weekly and monthly annual calculations.....                                 | <b>Error! Bookmark not defined.</b> |
| 78 | 5.1.2 | Handling of laboratory value detection limits.....                          | 18                                  |
| 79 | 5.1.3 | Handling of measured values out of the permissible specified range.....     | 19                                  |
| 80 | 5.1.4 | Handling of measured values for reasons other than tolerance deviation..... | <b>Error!</b>                       |
| 81 |       | <b>Bookmark not defined.</b>                                                |                                     |
| 82 | 5.1.5 | Handling of data at each evaluation time period.....                        | <b>Error! Bookmark not defined.</b> |
| 83 | 5.1.6 | Handling of discontinuation cases.....                                      | <b>Error! Bookmark not defined.</b> |
| 84 | 6     | Analysis method.....                                                        | 20                                  |
| 85 | 6.1   | Subject disposition.....                                                    | 20                                  |
| 86 | 6.2   | Sample for analysis.....                                                    | 20                                  |
| 87 | 6.3   | Patient characteristics.....                                                | 20                                  |
| 88 | 6.4   | Treatment status.....                                                       | 20                                  |

|     |       |                                                                          |                            |
|-----|-------|--------------------------------------------------------------------------|----------------------------|
| 89  | 6.5   | Efficacy endpoint .....                                                  | 21                         |
| 90  | 6.5.1 | Primary endpoint.....                                                    | 21                         |
| 91  | 6.5.2 | Secondary endpoint.....                                                  | 23                         |
| 92  | 6.5.3 | Other efficacy endpoints .....                                           | 23                         |
| 93  | 6.6   | Safety evaluation.....                                                   | 23                         |
| 94  | 6.6.1 | Adverse event.....                                                       | 23                         |
| 95  | 6.6.2 | Laboratory evidence.....                                                 | 24                         |
| 96  | 6.6.3 | Vital signs.....                                                         | 25                         |
| 97  | 6.6.4 | Electrocardiogram.....                                                   | 25                         |
| 98  | 6.7   | Exploratory analyses .....                                               | 25                         |
| 99  | 6.8   | Rationale for setting the target number of patients to be enrolled ..... | <b>Error! Bookmark not</b> |
| 100 |       | <b>defined.</b>                                                          |                            |
| 101 | 7     | Appendix .....                                                           | 27                         |
| 102 | 8     | Reference material .....                                                 | 27                         |
| 103 | 9     | Citation.....                                                            | 27                         |
| 104 | 10    | Revision history.....                                                    | 28                         |
| 105 |       |                                                                          |                            |

## 106 List of abbreviations

| Abbreviations      | Non-abbreviated expressions (English)                            |
|--------------------|------------------------------------------------------------------|
| ADS                | Analysis dataset                                                 |
| ALS                | Amyotrophic lateral sclerosis                                    |
| ALSAQ-40           | ALS assessment questionnaire-40                                  |
| ALSFRS-R           | ALS Functional Rating Scale-Revised                              |
| ATC classification | Anatomical Therapeutic Chemical Classification System            |
| BMI                | Body mass index                                                  |
| CI                 | Confidence interval                                              |
| FAS                | Full analysis set                                                |
| FVC                | Forced vital capacity                                            |
| GCP                | Good clinical practice                                           |
| LLT                | Lowest level term                                                |
| LSMean             | Least square mean                                                |
| MedDRA/J           | Medical Dictionary of Regulatory Activities/J                    |
| MMRM               | Mixed effect model for Repeated Measures                         |
| MMT                | Manual Muscle Testing                                            |
| MRC score          | Medical Research Council score                                   |
| PMDA               | Pharmaceuticals and Medical Devices Agency                       |
| PPS                | Per Protocol Set                                                 |
| PT                 | Preferred Term                                                   |
| Q1                 | 25 percentile                                                    |
| Q3                 | 75 percentile                                                    |
| SD                 | Standard deviation                                               |
| SE                 | Standard error                                                   |
| SOC                | System Organ Class                                               |
| TRI                | Translational Research Informatics Center for Medical Innovation |
| WHO DD             | WHO Drug Dictionary                                              |

107

108

---

## 109 **1 BASIC ANALYSIS-RELATED CONTENT**

### 110 **1.1 Objectives and Research Question of the Study**

#### 111 Objective:

112 To evaluate the superiority of high-dose intramuscular E0302 (mecobalamin 50 mg) over placebo in  
113 patients with amyotrophic lateral sclerosis (ALS) using the Japanese-language revised ALS  
114 functional rating scale (ALSFRS-R) scores as indicators. We will also evaluate the safety of  
115 high-dose intramuscular E0302 (Methylcobalamin).

116

#### 117 Research Question:

118 Verification proposition: Can high-dose intramuscular mecobalamin (50 mg) when compared with  
119 placebo prevent the progression of symptoms at 16 weeks using the ALSFRS-R as an index?

120

#### 121 Estimand;

122 1. Target population:

123 2. Variables (or Evaluation items): Maximum analytic population (defined by analytic  
124 population).

125 3. Consideration of intermediate events: Change in ALSFRS-R total score between baseline to  
126 week 16 (defined by primary outcome).

127 Measurement after cessation of treatment: Measurements taken after the date of discontinuation  
128 are treated as missing data.

129 Measurement after administration of edaravone (prohibited drugs from concomitant use):  
130 treated as missing data.

131 Measurement after administration of new dose or increased dose of riluzole (limited drugs from  
132 concomitant use): treated as a missing data.

133 4. Summary of variables at the population level: Reject the null hypothesis that the means of the  
134 differences between groups are equal.

135

#### 136 Research Strategy Positioning:

137 Previous research: Phase II/III study (E0302-J081-761)

138 Three-arm comparative study of placebo and E0302 at 25 and 50 mg. In the subpopulation of  
139 patients within 1 year of onset with a decrease of 1 to 2 points in the ALSFRS-R during the

140 observation period (12 weeks) in this study, the mean  $\pm$  standard deviation of the change in total

141 ALSFRS-R score at 16 weeks was  $-3.2 \pm 4.0$  points in the mecobalamin 50 mg group (n=26) and

142  $-5.8 \pm 5.0$  points in the placebo group (n=32) (mean difference: -2.6).

143

144

145 **1.2 Schema**

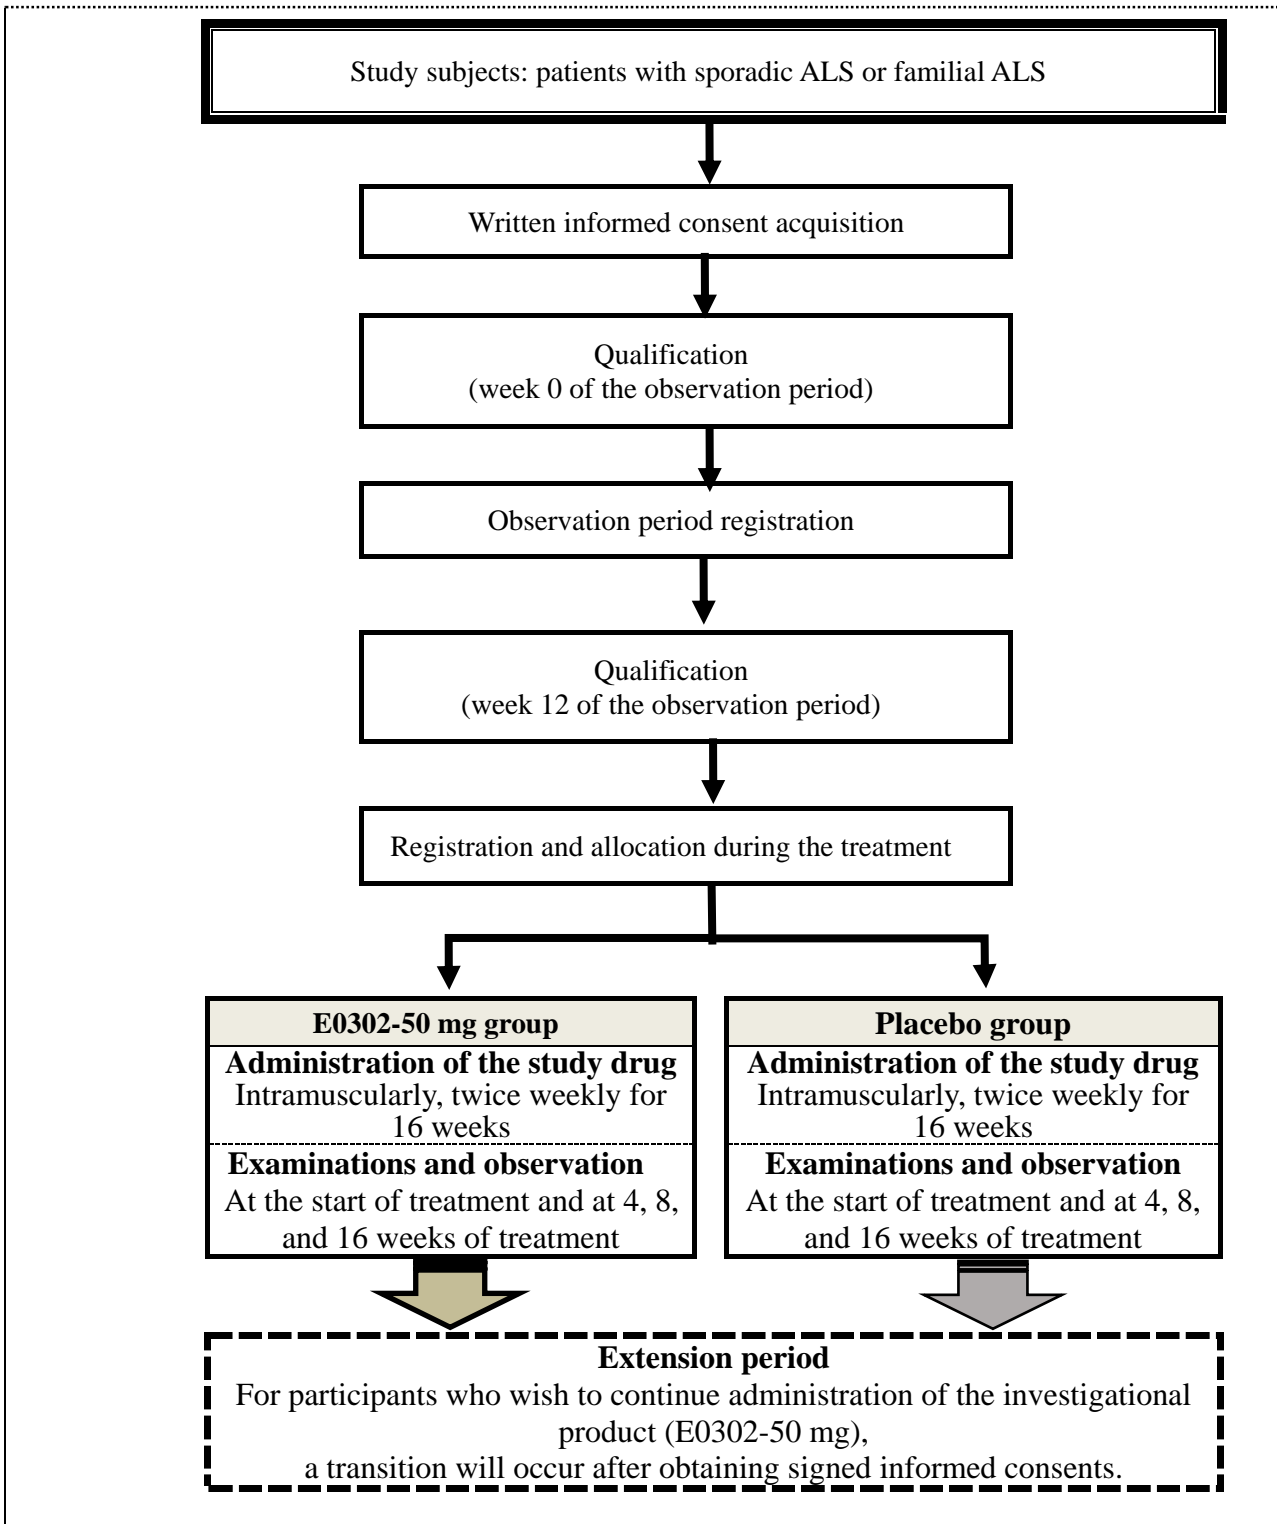

146

147

148  
149**1.3 Summary of studies**

|                                 |                                                                                                                                                                                                                                                                                                                                                                                                                                                                                                                                                                                                                                                                                                                                          |
|---------------------------------|------------------------------------------------------------------------------------------------------------------------------------------------------------------------------------------------------------------------------------------------------------------------------------------------------------------------------------------------------------------------------------------------------------------------------------------------------------------------------------------------------------------------------------------------------------------------------------------------------------------------------------------------------------------------------------------------------------------------------------------|
| Target sample size              | 128 patients (64 in the placebo group, 64 in the E0302-50 mg group)                                                                                                                                                                                                                                                                                                                                                                                                                                                                                                                                                                                                                                                                      |
| Case registration period        | 2017.10-2019.9 (2 year)                                                                                                                                                                                                                                                                                                                                                                                                                                                                                                                                                                                                                                                                                                                  |
| Date of completion of follow-up | 2020.3                                                                                                                                                                                                                                                                                                                                                                                                                                                                                                                                                                                                                                                                                                                                   |
| Design                          | Double-blind, parallel-group study                                                                                                                                                                                                                                                                                                                                                                                                                                                                                                                                                                                                                                                                                                       |
| Allocation                      | The following items will be used as allocation adjustment factors (minimization factors) for allocation using a variant of the minimization method, taking into account the balance within the institution and the overall balance of the treatment groups: <ul style="list-style-type: none"> <li>▪ Disease type (bulbar, upper extremity, and lower extremity)</li> <li>▪ Severity of ALS at the end of the observation period (grade 1 and 2)</li> <li>▪ Time from onset to start of the observation period (<math>\leq 9</math> months, 9 to 12 months)</li> <li>▪ %FVC at the end of the observation period (<math>&lt; 90\%</math>, or <math>\geq 90\%</math>)</li> <li>▪ Previous administration of edaravone (yes/no)</li> </ul> |

150  
151  
152  
153

Observation flow diagram:

Trial design

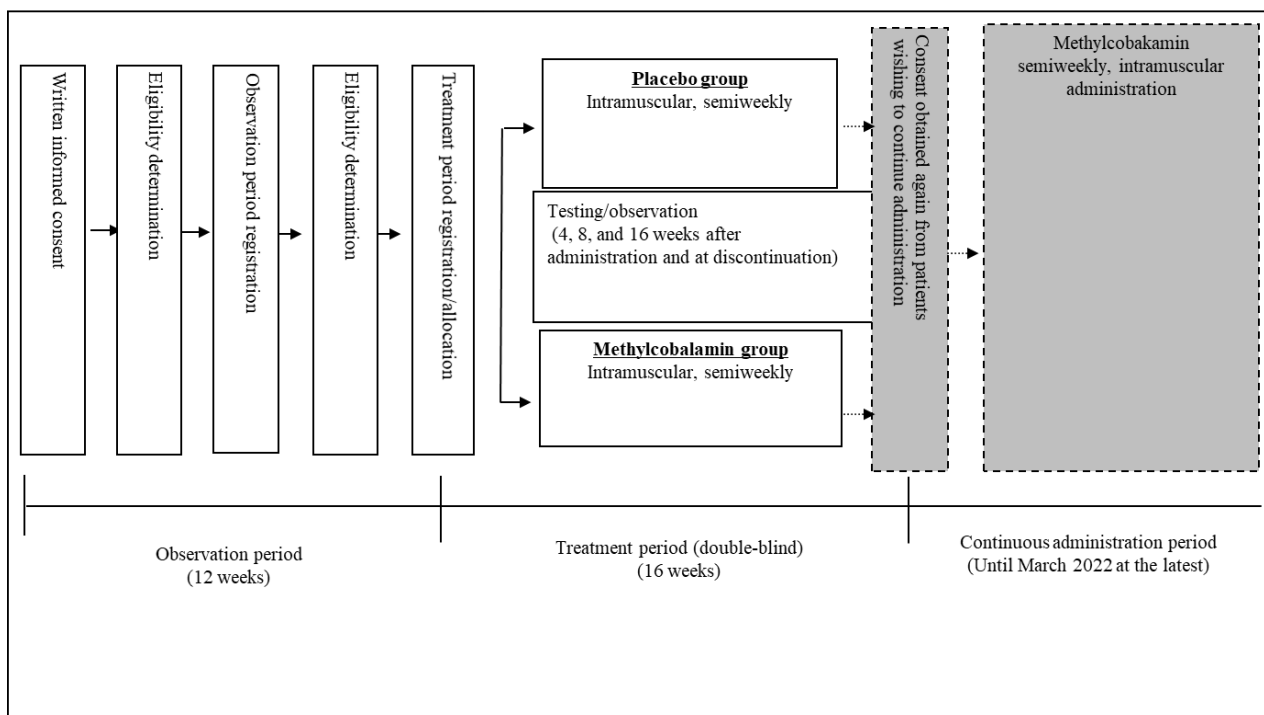





\*1 Should be conducted from Day 0 (Allocation date) to Day3. \*2 Obtained informed consent from Week 12 to Week 16. \*3 Occurrence of the Event and Adverse event are required to be reported from the last administration date to 28 days later. \*4 Conducted in the eligible patients for the treatment period. \*5 Measurement of serum Vitamin B12 level is conducted. \*6 Women only take a pregnancy test. \*7 Conducted before administration of the investigational product. \*8 QT assessments are conducted before administration of the investigational product if the first administration is on the allocation date. \*9 QT assessments are conducted twice (before administration and 2 hours later after administration). \*10 Conducted from Week 8 to the last administration date of Week 15. \*11 The results of electromyography and nerve conduction studies conducted in the other medical institutions allowed to be evaluated. \*12 Among the patients enrolled in the treatment phase, ALSFRS-R evaluation and investigation of concomitant medication and concomitant therapy will be conducted as much as possible until Week 16 of the treatment phase for the discontinued patients except for the untreated patients (except for those who refuse to continue participation in the study or withdraw consent). \*13 For twice-weekly administration of the study drug, the drug will be administered twice during a 7-day period starting from the start date of the treatment/continuation period. The interval between doses should be at least one day, and two doses (4 vials) on the same day is not allowed. \*14 Performed after last administration of the investigational drug and within  $\pm 2$  weeks from the discontinuation date.

---

156 **1.4 Data storage location**

157 The data provided by the DM and the analysis data set (ADS) used for the analysis will be saved as  
158 follows:

159

---

|             |                                                                                                   |
|-------------|---------------------------------------------------------------------------------------------------|
| DM Dataset: | Z:\01_プロジェクト\TRI プロジェクト 2\325_TRINEU1701(梶)\09_生物統計<br>09_最終解析\2_ANALYSIS\EXECUTE1\01_DATA\DM_RAW |
|-------------|---------------------------------------------------------------------------------------------------|

---

|      |                                                                                                |
|------|------------------------------------------------------------------------------------------------|
| ADS: | Z:\01_プロジェクト\TRI プロジェクト 2\325_TRINEU1701(梶)\09_生物統計<br>09_最終解析\2_ANALYSIS\EXECUTE1\01_DATA\ADS |
|------|------------------------------------------------------------------------------------------------|

---

160

161 **1.5 Analysis software**

162 Analyses will be performed using software packages SAS Version 9.4 (SAS Institute, Cary, NC,  
163 USA) and R version 3.6.

164

165 **2 Analysis purpose**  
 166 This statistical analysis plan defines the details of the final analysis specified in the protocol.

167 **2.1 Changes in Analytical Procedures from the Protocol**

168 Changes in analytical methods from Protocol version 5.0 (dated April 24, 2019) are shown below.

| Descriptions after change                                                                                                                                                                                                                                                                                                                                                                                        | Reasons for change                                                                                                                                                                                                                                                                                                                                                            |
|------------------------------------------------------------------------------------------------------------------------------------------------------------------------------------------------------------------------------------------------------------------------------------------------------------------------------------------------------------------------------------------------------------------|-------------------------------------------------------------------------------------------------------------------------------------------------------------------------------------------------------------------------------------------------------------------------------------------------------------------------------------------------------------------------------|
| <b>18.2.2.1 Analysis of subject characteristics</b><br>Add unpaired t-test in addition to Wilcoxon rank-sum test and Fisher's exact test for comparison of homogeneity between treatment groups.                                                                                                                                                                                                                 | In the previous trial (E0302-J081-761), an unpaired t-test was adopted. The same test should be used to compare the homogeneity for similar characteristic items.                                                                                                                                                                                                             |
| <b>18.2.2.1 Analysis of subject characteristics</b><br>Summary statistics (mean, standard deviation, minimum, median, and maximum) of blood homocysteine concentration at week 12 of the observation period will be estimated and compared by the corresponding t-test between eligible and ineligible patients for the treatment period.                                                                        | It is necessary to confirm whether blood homocysteine concentration is similar or not between eligible and ineligible patients for the treatment period.                                                                                                                                                                                                                      |
| <b>18.2.2.3 Prior and Concomitant Therapies</b><br>There will be no data collection by PPS.                                                                                                                                                                                                                                                                                                                      | PPS is not the primary analysis, and there is no point in comparing the two groups.                                                                                                                                                                                                                                                                                           |
| <b>18.2.2.4.1 Primary Endpoint</b><br>A secondary analysis comparing the change at each time point between groups by the Wilcoxon rank-sum test will be added.                                                                                                                                                                                                                                                   | For comparison with the results of the previous trial (E0302-J081-761), the same test method as in the last phase will be used for intergroup comparison.                                                                                                                                                                                                                     |
| <b>18.2.2.4.1 Primary Endpoint</b><br>The following analyses will be added as sensitivity analyses. The ALSFRS-R total score at baseline, week 4, 8, and 16 will be used as the response variable, and a linear regression equation will be fitted to the time point and response variable, and the slope between groups will be compared by a mixed model with the intercept and slope as the variable effects. | To estimate the pattern of ALSFRS-R total scores over time and to compare between groups.                                                                                                                                                                                                                                                                                     |
| <b>18.2.2.4.1 Primary Endpoint</b><br>The following analysis will be added as a supplementary analysis.<br>(1) Primary and secondary analysis will be performed. Missing values due to death were assigned the previous value and the worst possible value (0 point).<br>(2) The AUC of the change in ALSFRS-R from baseline to week 16 will be used as the                                                      | (1) The primary analysis will not compensate for missing data due to death during the treatment period. Therefore, we will conduct a supplementary analysis under some assumptions about missing data.<br>(2) To examine the average transition from the baseline to week 16.<br>(3) It is necessary to conduct an analysis with different handling of intermediate events to |

|                                                                                                                                                                                                                                                                                                                                                                                                                                   |                                                                                                                                                                                                                                                                                                                                        |
|-----------------------------------------------------------------------------------------------------------------------------------------------------------------------------------------------------------------------------------------------------------------------------------------------------------------------------------------------------------------------------------------------------------------------------------|----------------------------------------------------------------------------------------------------------------------------------------------------------------------------------------------------------------------------------------------------------------------------------------------------------------------------------------|
| <p>endpoint, and the groups will be compared by analysis of covariance with the baseline value as the covariate and the treatment group as the factor.</p> <p>(3) Primary and secondary analyses will be performed, which include the data from patients who are administered edaravone or changed the daily dose of riluzole during the treatment period.</p>                                                                    | <p>confirm the robustness of the analysis results.</p>                                                                                                                                                                                                                                                                                 |
| <p><b>18.2.2.4.1 Primary Endpoint</b><br/>Summary statistics will be calculated for each stratum of the stratification factors (4.4.1), and the change at each time point will be compared between groups by the Wilcoxon rank-sum test.</p>                                                                                                                                                                                      | <p>To perform stratified analysis to explore differences in efficacy across patient populations.</p>                                                                                                                                                                                                                                   |
| <p><b>18.2.2.4.1 Primary Endpoint</b><br/>ALSFRS-R sub-score (Bulbar score, Limb score, and Respiratory score) will be compared between groups by calculating summary statistics and Wilcoxon rank-sum test for change at each time point.</p>                                                                                                                                                                                    | <p>To explore what factors are responsible for the changes in ALSFRS-R, we will examine the changes in the ALSFRS-R sub-score.</p>                                                                                                                                                                                                     |
| <p><b>18.2.2.4.2 Secondary Endpoint</b><br/>Norris scale sub-score<br/>Limb Norris Scale score<br/>Norris Bulbar Scale score<br/>ALSAQ-40 sub-score<br/>Physical Mobility<br/>ADL<br/>Eating and Drinking<br/>Communication<br/>Emotional Functioning</p>                                                                                                                                                                         | <p>To explore what factors are responsible for the changes in the Norris scale and ALSAQ-40, we will examine the changes in their sub-score.</p>                                                                                                                                                                                       |
| <p><b>18.2.3.1. Adjustment Using Covariates</b><br/>The following analyses will not be performed. Multiple regression analysis will be performed to determine the impact on the primary endpoint of background and prognostic factors that were not found to be homogenous between treatment groups among the subject characteristics that may affect the clinical evaluation of ALS (to be determined prior to key opening).</p> | <p>Multiple regression analysis to determine the impact on the primary analysis of the background and prognostic factors that were not found to be homogenous between treatment groups were replaced with the sensitivity analysis of the primary analysis. This analysis directly reinforces the testing hypothesis of the study.</p> |

169  
170  
171  
172  
173  
174

### 175 **3 Analysis Sets**

176 Of the patients enrolled during the treatment phase, we will include individuals meeting the  
177 inclusion criteria in the safety analysis population, and those who do not meet the inclusion criteria  
178 will be excluded:

- 179 • Individuals from whom we have not obtained signed informed consent forms.
- 180 • Individuals who do not meet the inclusion criteria for the primary target disease (inclusion  
181 criteria [1] to [5]).
- 182 • Individuals who have not received the investigational product.
- 183 • Individuals with no evaluable safety data.

#### 184 **3.1 Full Analysis Set**

185 We will exclude the following individuals from the full analysis set (FAS) during the enrollment in  
186 the treatment phase:

- 187 • Individuals who do not meet the primary inclusion criteria (inclusion criteria [1] to [5]).
- 188 • Individuals who are categorized under a GCP violation, such as administration outside the  
189 study period or not providing signed informed consent forms.
- 190 • Individuals lack data on the components of the primary endpoint (ALSFRS-R).
- 191 • Individuals who have not received the investigational product.

#### 192 **3.2 Protocol-compliant population (PPS)**

193 The Per Protocol Population (or per-protocol set, PPS) is defined as the set excluding individuals  
194 who meet the following criteria from the FAS:

- 195 • Individuals lack data from week 8 onward regarding the component of the primary endpoint  
196 that can be assessed (ALSFRS-R).
- 197 • Individuals who meet exclusion criteria affecting efficacy assessment (exclusion criteria [1], [8],  
198 [14]).
- 199 • Individuals who have a cumulative injection rate lower than 70% of the investigational product  
200 until the date of completion or discontinuation of the study.
- 201 • Individuals who withdraw from the study after less than 8 weeks.

#### 202 **3.3 Significant protocol deviations**

203 Major protocol deviations include the following:

- 204 • Individuals lack data from week 8 onward regarding the component of the primary endpoint  
205 that can be assessed (ALSFRS-R).
- 206 • Individuals meeting exclusion criteria affecting efficacy assessment (exclusion criteria [1], [8],  
207 [14]).
- 208 • Individuals who have a cumulative injection rate lower than 70% of the investigational product  
209 until the date of completion or discontinuation of the study.
- 210 • Individuals who withdraw from the study within 8 weeks.

211  
212 Researchers at the data center will evaluate protocol deviations for case accrual and define critical  
213 protocol deviations and case management during case review meetings by the time the study data  
214 are fixed.

### 216 **4 Definition of endpoints**

217 The endpoints of the double-blind study period will be as follows.

218 The endpoints of the continuous treatment period will be the time from baseline to the date of an  
219 event (all-day use of non-invasive respiratory support, use of invasive respiratory support, or death),  
220 the change in ALSFRS-R total score, adverse events, laboratory test values, vital signs, and  
221 electrocardiograms.

222 **4.1 Efficacy endpoint**

223 **4.1.1 Primary endpoint**

- 224 • Change in ALSFRS-R total scores from baseline to 16 weeks of treatment.

225

226 The change from baseline in ALSFRS-R total scores at weeks 4 and 8 of the treatment period will  
227 be the secondary analysis endpoint.

228 ALSFRS-R total scores at different time points during the observation period: week 0, 12 of the  
229 observation period, week 4, 8, and 16 (completion/discontinuation) of the treatment period).

230

231 The following ALSFRS-R itemized scores measured at each time point will also be analyzed as  
232 supplement data.

- 233 • Bulbar score: Total scores of Speech, Salivation, and Swallowing.  
234 • Limb score: Total scores of Handwriting, Cutting food, Dressing, and hygiene, Turning in bed, Walking, and  
235 Climbing stairs.  
236 • Respiratory score: Total scores of Dyspnea, Orthopnea, and Respiratory insufficiency.

237

238 The area under the curve (AUC) for the double-blind study period of the change in ALSFRS-R total  
239 score is calculated by the following formula. However, if the patient does not complete the 16-week  
240 treatment period, the weekly AUC up to the last measurement point should be calculated.

241

$$AUC_{DBT} = \frac{(0 + R_4) \times 4 + (R_4 + R_8) \times 4 + (R_8 + R_{16}) \times 8}{2 \times 16}$$

242

$R_4$ : Change in ALSFRS – R total score *at* week 4 from the last score

$R_8$ : Change in ALSFRS – R total score *at* week 8 from the last score

$R_{16}$ : Change in ALSFR – R total score *at* week 16 from the last score

243

244 **4.1.2 Secondary endpoint**

245 **4.1.2.1 Time-to-event**

246 Time from the investigational product allocation date to the first occurrence of any of the following  
247 events:

- 248 • Full-day non-invasive respiratory support  
249 • Use of invasive respiratory support device  
250 • Death

251

252 The time-to-event is determined by the following equation:

253 = investigational drug administration start-day + 1

254

255 **4.1.2.2 Change in %FVC**

256 Measurements at each time point during week 0 (start) and week 12 (end, baseline) of the  
257 observation period, week 8, and week 16 (completion/discontinuation) of the treatment period.

258 Calculate the change from baseline to week 8 and week 16 (at discontinuation) of the treatment  
259 period at each time point.

260 **4.1.2.3 Change in blood homocysteine levels**

261 Intensive measurements at week 12 (end) and week 16 (completion/discontinuation) in the  
262 observation period. Calculate the change from baseline to week 16 (at discontinuation) of the

263 treatment period at each time point.

#### 264 **4.1.2.4 Change in MMT total score**

265 Measurements at each time point during week 12 (end, baseline) of the observation period, week 8,  
266 and week 16 (completion/discontinuation) of the treatment period. Calculate the change from  
267 baseline to week 8 and week 16 (at discontinuation) of the treatment period at each time point.

#### 268 **4.1.2.5 Change in Grip strength (right and left)**

269 Measurements at each time point during week 12 (end, baseline) of the observation period, week 8,  
270 and week 16 (completion/discontinuation) of the treatment period. Calculate the change from  
271 baseline to week 8 and week 16 (at discontinuation) of the treatment period at each time point.

#### 272 **4.1.2.6 Change in Norris scale total score**

273 Measurements at each time point during week 12 (end, baseline) of the observation period, week 8,  
274 and week 16 (completion/discontinuation) of the treatment period. Calculate the change from  
275 baseline to week 8 and week 16 (at discontinuation) of the treatment period at each time point.

276 Measurements of the following Norris scale sub-scores at each time point will also be analyzed as a  
277 supplement.

- 278 · Limb Norris Scale total score
- 279 · Norris Bulbar Scale total score

#### 280 **4.1.2.7 Change in ALSAQ 40 total score**

281 Measurements at each time point during week 12 (end, baseline) of the observation period, week 8,  
282 and week 16 (completion/discontinuation) of the treatment period. Calculate the change from  
283 baseline to week 8 and week 16 (at discontinuation) of the treatment period at each time point.

284 Measurements of the following ALSAQ-40 sub-items at each time point will also be analyzed as a  
285 supplement.

- 286 · Physical Mobility [10 items: 1-10]
- 287 · ADL (Activities of Daily Living), Independence [10 items: 11-20]
- 288 · Eating and Drinking [3 items: 21-23]
- 289 · Communication [7 items: 24-30]
- 290 · Emotional Functioning [10 items: 31-40]

## 291 **4.2 Other efficacy endpoints**

292 None

## 293 **4.3 Safety endpoint**

### 294 **4.3.1 Adverse events**

295 Adverse events reported will be assigned a Lowest Level Term (LLT) code using the MedDRA/J  
296 dictionary. The MedDRA and J versions used for analysis will be updated at the time of database  
297 locking.

298 Adverse events will be summarized for the period from post-study drug administration to week 16  
299 of treatment (completion/discontinuation). Adverse events in the double-blind study period for  
300 patients who have progressed to the continuous-dose phase are those that occur up to the day before  
301 the first dose of the continuous treatment period.

302 Adverse reactions will be considered “related” to the study drug.

303

304 The starting date for the time-to-onset of the adverse event is the starting day of administration.

305  $\text{Time-to-onset of adverse event} = [\text{date of onset of adverse event}] - [\text{study drug start date}] + 1$

306

307 If more than one adverse event of the same preferred term (PT) occurs in a single subject, we will  
308 count the number of adverse events as one subject. If a causal relationship is judged to be causal

309 even once, the causal judgments of the cases will be aggregated as causal.

#### 310 **4.3.2 Laboratory test values**

311 Measurements at each time point during week 0 (start) and week 12 (end, baseline) of the  
312 observation period, week 4 and week 16 (completion/discontinuation) of the treatment period, and  
313 the continuous treatment period.

#### 314 **4.3.3 Vital signs**

315 Measurements at each time point during week 0 (start) and week 12 (end, baseline) of the  
316 observation period, week 4 and week 16 (completion/discontinuation) of the treatment period, and  
317 the continuous treatment period.

#### 318 **4.3.4 Electrocardiogram**

319 Measurements for heart rate, RR interval, PR interval, RQS width, QT interval, QTcB, QTcF,  
320 central reading QTcB, and central reading QTcF twice before and after treatment at each time point  
321 during week 0 and week 16 (completion/discontinuation) of the treatment period.  
322 ECG abnormalities at week 0 (start) and week 12 (end, baseline) of the observation period, and  
323 week 0 and week 16 (completion/discontinuation) of the treatment period.

### 324 **4.4 Other items**

#### 325 **4.4.1 Stratification factor**

- 326 ▪ Age at onset: <65 years, ≥65 years
- 327 ▪ Sex: male, female
- 328 ▪ Disease type: aggregate in the following two categories
- 329 1) bulbar, limb (upper extremity or lower extremity).
- 330 2) Bulbar, upper extremity, lower extremity.
- 331 ▪ Time from onset to start of follow-up: 9 months or less, greater than 9 months, and 12 months
- 332 or less.
- 333 ▪ %FVC at the end of observation period: less than 90%, more than 90%.
- 334 ▪ Change in %FVC during the observation period: <0, ≥0
- 335 ▪ History of edaravone administration: yes, no
- 336 ▪ Concomitant use of riluzole: yes, no
- 337 ▪ Age at onset: aggregate in the following four categories
- 338 1) <65 years, ≥65 years
- 339 2) <60 years, ≥60 years
- 340 3) <70 years, ≥70 years
- 341 4) <50 years, 50-59 years, 60-69 years, ≥70 years
- 342 ▪ Nutrition status: BMI <18.5, ≥18.5
- 343 ▪ The updated Awaji criteria at the end of the observation period: Definite, Probable, Probable
- 344 laboratory-supported
- 345 ▪ The updated Awaji criteria at the end of the observation period: Definite, Probable, Probable
- 346 laboratory-supported
- 347 ▪ The El Escorial revised Airlie House diagnostic criteria at the end of the observation period:
- 348 Definite, Probable, Probable laboratory-supported
- 349 ▪ Muscle strength of neck flexors at the end of observation period: MRC score 5, ≤4
- 350 ▪ ALS severity grade at the end of observation period: Grade1, 2
- 351 ▪ Change in ALSFRS-R total score during the observation period: -1, -2 points
- 352 ▪ ALSFRS-R total score at the end of observation period: ≤37, 38-42, ≥43



353

354 A subpopulation of ALS patients who are diagnosed with Definite, Probable, Probable-laboratory  
355 supported grade by the El Escorial revised Airlie House diagnostic criteria.

356 - The diagnostic criteria of ALS in this study (the updated Awaji criteria) have been modified  
357 from the El Escorial revised Airlie House diagnostic criteria in the previous study  
358 (E0302-J081-761). For comparison with the previous study, we will conduct an analysis in  
359 a subpopulation using the same diagnostic criteria as in the previous study.

360

361 Additional categories for safety analysis:

362 • Grade by the degree of liver dysfunction at screening: Normal, Grade 1,  $\geq 2$

363 • Grade by the degree of renal dysfunction at screening: Normal, Grade 1,  $\geq 2$

364

#### 365 4.4.2 Cumulative administration rate

366 • Cumulative administration rate = [Number of administration (times)] / [Prescribed  
367 administration period (weeks) \*2] \*100

368

369 Prescribed administration period (weeks) = ([Date of last administration] - [Initiation date of  
370 administration] + 1) / 7

371 The decimal point of the prescribed administration period is rounded up. The prescribed  
372 administration period for the double-blind period does not exceed 16. For patients who experienced  
373 an event, the date of administration prior to the date of the event is used as the last date of  
374 administration.

375

376 **5 Data handling**377 **5.1 Baseline**

378 The baseline is the observation period of week 12 (at the end of the observation period).

379 **5.2 Time window**380 The time point of the observation period in the analysis of the efficacy endpoints will be the  
381 calculated visit, in which the time point of the visit is calculated from the end of the treatment  
382 period by the following time window.383 Number of observation days are as follows: [Number of observation days] = [Date of evaluation] -  
384 [Initiation date of administration] + 1385 If two observed values are found within the same time window, the one closer to the target number  
386 of days is used as the observed value at that time.

387

| Visit                                           | Target weeks | Allowance of protocol | Allowance of analysis | The target number of days | The lower limit of days | The upper limit of days |
|-------------------------------------------------|--------------|-----------------------|-----------------------|---------------------------|-------------------------|-------------------------|
| Baseline                                        | 12           | 1                     | 1                     | 84                        | 77                      | 91                      |
| Week 4 (the treatment period)                   | 4            | 1                     | 1                     | 28                        | 21                      | 35                      |
| Week 8 (the treatment period)                   | 8            | 1                     | 2                     | 56                        | 42                      | 70                      |
| Week 16 (the treatment period)                  | 16           | 2                     | 2                     | 112                       | 98                      | 126                     |
| Week 12 (the continuous administration period)  | 28           | 2                     | 4                     | 196                       | 168                     | 224                     |
| Week 24 (the continuous administration period)  | 40           | 2                     | 4                     | 280                       | 252                     | 308                     |
| Week 36 (the continuous administration period)  | 52           | 2                     | 4                     | 364                       | 336                     | 392                     |
| Week 48 (the continuous administration period)  | 64           | 2                     | 4                     | 448                       | 420                     | 476                     |
| Week 60 (the continuous administration period)  | 76           | 2                     | 4                     | 532                       | 504                     | 560                     |
| Week 72 (the continuous administration period)  | 88           | 2                     | 4                     | 616                       | 588                     | 644                     |
| Week 84 (the continuous administration period)  | 100          | 2                     | 4                     | 700                       | 672                     | 728                     |
| Week 96 (the continuous administration period)  | 112          | 2                     | 4                     | 784                       | 756                     | 812                     |
| Week 108 (the continuous administration period) | 124          | 2                     | 4                     | 868                       | 840                     | 896                     |
| Week 120 (the continuous administration period) | 136          | 2                     | 4                     | 952                       | 924                     | 980                     |

388

389 **5.3 Handling of measured values at the administration of prohibited drugs and restricted**  
390 **concomitant drugs**

- 391 • The measured values after administration of edaravone (prohibited drug) are handled as missing values.  
392 • The measured values after administration of increased dose or a new start of riluzole (restricted concomitant  
393 drug) are handled as missing values.  
394

395 **5.4 Completion of missing values**

396 For all assessment items, missing data values will not be imputed.  
397

398 **5.5 Weekly and monthly annual calculations**

399 We will calculate weeks and months from days according to the following formulas:

400 Weekly conversion:  $\text{days}/7$

401 Monthly conversion:  $\text{days} \times (12/365.25)$

402 Annual conversion:  $\text{days}/365.25$   
403

404 **5.6 Handling of laboratory value detection limits**

405 In our summary statistics of laboratory values, we will handle the laboratory values (the detection  
406 limit of laboratory values) as the laboratory limit measurements. However, a list with missing data  
407 will indicate it is below the quantitation limit.  
408

## 409 **6 Analysis method**

410 The FAS analysis will be the primary efficacy analysis, and the PPS analysis will be performed as  
411 an additional sensitivity analysis for the primary and secondary endpoints.

- 412 • In the calculation of summary statistics, the decimal point of the mean, standard deviation (SD),  
413 and median will be expressed as an increase of 1 digit. Similarly, the decimal points of adjusted  
414 means (LSMean) and SEs will also be presented as increasing by orders of magnitude. The  
415 decimal point of the minimum and maximum values will be the same.
- 416 • The level of significance in a test will be 5% two-sided.
- 417 • For p values, a value lower than 0.001 will be labeled “ $p < 0.001$ ”. In the case of 0.001 or more,  
418 the four digits after the decimal point will be rounded off, and the indicated digits will be three  
419 digits after the decimal point.
- 420 • All calculations of confidence intervals will be two-sided 95% confidence intervals.
- 421 • The number of cases will be expressed as integers, and the percentages of cases and their 95%  
422 confidence intervals will be shown to one decimal place. We will calculate the 95% confidence  
423 interval for the incidence (%) using the Clopper-Pearson method with accurate confidence  
424 intervals.  
425

### 426 **6.1 Subject disposition**

427 We will prepare flow diagrams for patients enrolled during the observation period, discontinued  
428 during the observation period, enrolled during the treatment period, untreated, discontinued during  
429 the treatment period, and for those who complete the treatment period. Cases of discontinuation in  
430 the observation period, untreated cases, and discontinuation in the treatment period will be tabulated  
431 by reason in a list.

### 432 **6.2 Sample for analysis**

433 We will present the number of patients for each SAS, FAS, and PPS. The exclusions will be  
434 tabulated by reason for exclusion in an exclusion list.

### 435 **6.3 Patient characteristics**

436 For patient demographics, we will determine summary statistics (sample size, mean, SD, minimum,  
437 median, and maximum) for quantitative variables and sample size/percentage for each treatment  
438 group for qualitative variables. We will determine bias between groups by Fisher exact test,  
439 unpaired t-test, and Wilcoxon rank-sum test. Categories of background items will be shown in the  
440 sample figures and tables (SAS, FAS, PPS).

441 The frequency of complications and medical history will be summarized by system organ class  
442 (SOC: System organ class) and PT using the MedDRA/J dictionary (SAS).

443 We will assign concomitant medications WHO Drug Global codes and will aggregate frequencies  
444 by the group for each ATC classification during the treatment period and the continuous treatment  
445 period (SAS, FAS).

446 The frequency of combination therapy will be summarized by the group for each combination  
447 treatment during the treatment period and the continuous treatment period (SAS, FAS).

448 Summary statistics (mean, SD, minimum, median, and maximum) will be compared between the  
449 treatment period enrollees and treatment period ineligible individuals by paired *t*-test for  
450 homocysteine measurements at week 12 of the observation period.

### 451 **6.4 Treatment status**

452 Summarize the number of administrations, duration of treatment, administration rate (number of

453 administrations/scheduled administrations), number of drug withdrawal, days of drug withdrawal,  
454 and treatment discontinuation rate for each group during the double-blind period (SAS, FAS, PPS).  
455 Summarize the number of administrations, duration of treatment, treatment discontinuation rate, and  
456 rate of self-administration (numbers of self-administration / numbers of administrations) during the  
457 continuous treatment period (SAS, FAS).  
458  
459

## 460 **6.5 Efficacy endpoint**

### 461 **6.5.1 Primary endpoint**

462 For FAS, the change from baseline in the total ALSFRS-R score at 4, 8, and 16 weeks will be fitted  
463 to a mixed-effects model with baseline values as covariates, treatment group, time points at 4, 8,  
464 and 16 weeks, minimizers (disease type, severity of ALS at the end of the observation period, time  
465 from initial onset to start of the observation period, %FVC at the end of the observation period, and  
466 history of edaravone treatment), the interaction between time point and treatment group as a  
467 population effect, and patient as a variable effect. We will fit a mixed-effects model with repeated  
468 measurements (MMRM) that include the interaction between time point and treatment group as a  
469 population effect and the patient as a variable effect.  
470

471 For the estimation of the variance-covariance matrix between time points, we assume an  
472 unstructured structure based on the data, but if it does not converge, we use Heterogeneous TOEP  
473 (TOEPH), Heterogeneous AR(1) (ARH(1)), Heterogeneous CS (CSH) Toeplitz (TOEP), Spatial  
474 Power (SP(POW)), Autoregressive (1) (AR(1)), and Compound Symmetry (CS).  
475

476 The missing values at each time point will not be compensated. The time point of administration,  
477 including treatment discontinuation cases, will be calculated from the observation date of  
478 ALSFRS-R in the time window shown in Section 5.2.  
479

#### 480 Primary Analysis:

481 According to the model described above, the upper limit of the 95% confidence interval of the  
482 least-squares means (LSMean) of the difference between the placebo group and the E0302 50 mg  
483 group (placebo group - E0302 50 mg group) of the change in the total number of points in the  
484 ALSFRS-R at week 16 of the treatment period will be considered significant if it is below 0.  
485

#### 486 Secondary analysis:

- 487 ▪ The LSMean and its 95% confidence interval for each group at 4, 8, and 16 weeks of the  
488 treatment period and the LSMean and its 95% confidence interval for the difference between  
489 groups and the P-value for the test of difference (not adjusted for multiplicity) will be  
490 calculated.
- 491 ▪ A longitudinal trend graph for each group with the mean at each time point on the vertical axis  
492 and the time point on the horizontal axis will be created.
- 493 ▪ Summary statistics (number of patients, mean, standard deviation, minimum, first quartile,  
494 median, third quartile, and maximum) of the measurements and changes at each time point  
495 from the beginning of the treatment period to 16 weeks will be calculated.
- 496 ▪ Intergroup comparisons will be made by the Wilcoxon rank-sum test for change at each time  
497 point (for comparison with study E0302-J081-761).  
498

#### 499 Sensitivity analysis:

- 500     ▪ Among the subject characteristics that are considered to affect the clinical evaluation of ALS,  
501     the target disease of this study (Section 4.4.1 Stratification Factors), the analysis will be  
502     conducted using an analytical model with background items for which uniformity between  
503     treatment groups could not be confirmed and prognostic factors considered necessary added as  
504     adjustment factors.
- 505     ▪ If the primary analysis does not converge on an unstructured structure, an analysis will be  
506     conducted in which the minimizing factors are excluded from the analysis model.
- 507     ▪ The ALSFRS-R total score at 0 (baseline), 4, 8, and 16 weeks of the treatment period will be  
508     used as the response variable, and a first-order regression equation will be fitted to the time  
509     point and response variable, and the slope between groups will be compared using a mixed  
510     model with the intercept and slope as variable effects.
- 511
- 512

511

512

513

#### Supplemental analysis:

514

515

516

517

518

519

520

521

522

523

524

525

526

527

528

529

530

531

532

533

534

535

536

537

538

539

540

541

542

543

544

545

546

- 514     ▪ A similar primary and secondary analysis and sensitivity analysis will be performed for PPS.
- 515     ▪ A similar primary and secondary analysis will be performed with missing values due to death  
516     compensated by the previous value.
- 517     ▪ A similar primary and secondary analysis will be performed with missing values due to death  
518     compensated for by the worst value of zero.
- 519     ▪ Intergroup comparisons will be performed by analysis of covariance with the baseline value as  
520     the covariate and the treatment group as the factor, using the AUC of change through week 16  
521     as the endpoint.
- 522     ▪ The same primary and secondary analyses will be performed for patients who started taking  
523     edaravone or riluzole during the treatment period or who changed the daily dose of riluzole,  
524     including measurements after the new or increased dose.
- 525     ▪ The same primary and secondary analysis will be performed for the subpopulation of clinically  
526     definite ALS, clinically probable ALS, and clinically probable-laboratory-supported ALS  
527     according to El Escorial revised Airlie House diagnostic criteria at the end of the observation  
528     period.
- 529     ▪ Summary statistics will be calculated for each stratum of the stratification factors (Section  
530     4.4.1), and the groups will be compared by the Wilcoxon rank-sum test for change at each time  
531     point.
- 532     ▪ Summary statistics will be calculated for each stratum of the ALSFRS-R for spherical function,  
533     motor function of extremities, and respiratory function, and the change at each time point will  
534     be compared between groups using the Wilcoxon rank-sum test.

#### Analysis of the continuous treatment period data:

537     The following analyses will be performed on the ALSFRS-R from the beginning of the treatment  
538     period to the end of the continuation period (Cut off data in case of continued administration).

- 539     ▪ Summary statistics (number of patients, mean, standard deviation, minimum, first quartile,  
540     median, third quartile, and maximum) of the measurements and changes from baseline to each  
541     time point will be calculated for the whole and each group. The amount of change will be tested  
542     by the signed-rank test. The same analysis will be performed for the item-specific scores of the  
543     ALSFRS-R for bulbar function, motor function of limbs, and respiratory function.
- 544     ▪ The median value at each time point for each group and the entire group will be used as the  
545     vertical axis, and the time point will be used as the horizontal axis to create a trend graph over  
546     time.

547

**548 6.5.2 Secondary endpoint**

549 The following analyses will be performed for FAS and PPS.

**550 6.5.2.1 Time-to-event**

551 The Kaplan-Meier method will be used to generate survival curves for each group and for the entire  
552 study, and the cumulative survival rate and its 95% confidence interval will be calculated for 16  
553 weeks of the treatment period and each 12-week period of the continuous treatment period. The  
554 hazard ratios and their confidence intervals will be calculated by the proportional hazards model,  
555 using the log-rank test for the time to event up to 16 weeks, with censoring after 16 weeks.

**556 6.5.2.2 %FVC changes**

557 Analyses similar to the primary and secondary analyses of the ALSFRS-R total score (Section  
558 6.5.1) will be performed. A supplementary analysis will be performed in PPS and the dataset in  
559 which missing values due to death were assigned the previous value.

**560 6.5.2.3 Blood homocysteine level changes**

561 Analyses similar to the primary and secondary analyses of the ALSFRS-R total score (Section  
562 6.5.1) will be performed. A supplementary analysis will be performed in PPS and the dataset in  
563 which missing values due to death were assigned the previous value.

**564 6.5.2.4 MMT total score changes**

565 Analyses similar to the primary and secondary analyses of the ALSFRS-R total score (Section  
566 6.5.1) will be performed. A supplementary analysis will be performed in PPS and the dataset in  
567 which missing values due to death were assigned the previous value.

**568 6.5.2.5 Grip strength changes (right and left)**

569 Analyses similar to the primary and secondary analyses of the ALSFRS-R total score (Section  
570 6.5.1) will be performed. A supplementary analysis will be performed in PPS and the dataset in  
571 which missing values due to death were assigned the previous value.

**572 6.5.2.6 Sum of Norris scale changes**

573 Analyses similar to the primary and secondary analyses of the ALSFRS-R total score (Section  
574 6.5.1) will be performed. A supplementary analysis will be performed in PPS and the dataset in  
575 which missing values due to death were assigned the previous value. Summary statistics will be  
576 calculated for the sub-items, and the groups will be compared by the Wilcoxon rank-sum test for the  
577 amount of change at each time point.

**578 6.5.2.7 ALSAQ 40 total score changes**

579 Analyses similar to the primary and secondary analyses of the ALSFRS-R total score (Section  
580 6.5.1) will be performed. A supplementary analysis will be performed in PPS and the dataset in  
581 which missing values due to death were assigned the previous value. Summary statistics will be  
582 calculated for the sub-items, and the groups will be compared by the Wilcoxon rank-sum test for the  
583 amount of change at each time point.

**584 6.5.3 Other Efficacy Endpoints**

585 None

**586 6.6 Safety evaluation****587 6.6.1 Adverse event**

588 The following analysis of adverse events in the double-blind period will be performed.

- 589 • The number of cases and percentage of incidence of each group will be tabulated to summarize  
590 the events related to adverse events. The 95% confidence intervals for the incidence of adverse

591 events, adverse reactions, serious adverse events, and adverse events leading to discontinuation  
592 will be calculated and compared between the placebo group and the E0302 50 mg group using  
593 Fisher's direct probability test.

- 594 • The number and percentage of adverse events will be tabulated for each group, SOC, and PT.
- 595 • The number and percentage of side effects will be tabulated for each group, SOC, and PT.
- 596 • The number and percentage of adverse events will be tabulated for each group, SOC, PT, and  
597 severity.
- 598 • The number and percentage of side effects will be tabulated for each group, SOC, PT, and  
599 severity.
- 600 • The number and percentage of severe adverse events will be tabulated for each group, SOC,  
601 and PT.
- 602 • The number and percentage of incidents of adverse events will be tabulated for each group,  
603 serious/nonserious, SOC, and PT.
- 604 • The number and percentage of incidents of adverse events leading to discontinuation of the  
605 investigational drug will be tabulated for each group, SOC, PT, and causal relationship.
- 606 • The incidence of adverse events and the incidence of adverse drug reactions in the  
607 subpopulation of the stratification factors (Section 4.4.1) will be tabulated for each group.  
608 The initial symptoms will be tabulated by two categories: bulbar onset and limb onset, and the  
609 age of onset will be tabulated by two categories: under 60 years old and over 60 years old.
- 610 • We will prepare a list of all deaths, a list of serious adverse events, and a list of adverse events  
611 that led to the discontinuation of study drug administration, regardless of when they occurred.  
612

613 The adverse events in the continuous treatment period will be tabulated in the following categories.

- 614 • Placebo group: Adverse events that will occur in the continuous treatment period.
- 615 • E0302 50mg group: Adverse events that will occur in the double-blind period and the  
616 continuous treatment period.
- 617 • Total groups: The sum of adverse events in the placebo group and E0302 50 mg group  
618 described above.

619

620 In addition to the analysis of the double-blind period described above, except for the analysis in the  
621 subpopulation, adverse events will be tabulated by the time of the first occurrence. No  
622 between-group comparison tests will be performed.

### 623 **6.6.2 Laboratory test values**

624 For physiological and hematological examinations, we will obtain the measurements at week 0  
625 (start) and week 12 (end, baseline) of the observation period, and week 4 and 16 (end) of the  
626 treatment period and summary statistics (number of individuals, mean, SD, minimum, median, and  
627 maximum) for the changes from week 12 (end, baseline) of the observation period for each group.  
628 We will compare the changes within groups using the Wilcoxon signed-rank test and the changes  
629 between the placebo and E0302-50 mg groups using the Wilcoxon rank-sum test. We will also make  
630 a box-and-whisker diagram of the test values for each group and each period.

631 We will create a shift table for urinalysis at week 12 (end, baseline) of the observation period, week  
632 4 and 16 (completion/discontinuation) of the treatment period and compare the changes within  
633 groups using the Wilcoxon signed-rank test and the changes between the placebo and E0302-50 mg  
634 groups using the Wilcoxon rank-sum test.

635 We will determine clinically significant abnormalities (Protocol Attachment 3: Criteria for



636 Confirmation of Abnormal Variations) and will determine the frequency of increase and decrease  
637 for each group during week 16 (completion/discontinuation) of the treatment period. The frequency  
638 of abnormal changes will be compared between the placebo group and the E0302 50 mg group  
639 using Fisher's direct probability test.

640 For the measurements of the continuous treatment period, the same analysis will be performed for  
641 the change from week 0 (start) of the observation period to each time point of the continuous  
642 treatment period.

### 643 **6.6.3 Vital signs**

644 We will perform analyses similar to those described in Section 6.6.2, "Laboratory Test Values."

### 645 **6.6.4 Electrocardiogram**

646 Measurements for heart rate, RR interval, PR interval, QRS width, QT interval, QTcB, QTcF,  
647 central reading QTcB, and central reading QTcF at baseline and at each time point of 8 or 16 weeks  
648 of the treatment period will be compared between groups using a mixed-effects model with  
649 post-dose values as the objective variable, pre-dose values as the covariate, treatment group as the  
650 fixed effect, and patient as the variable effect. Summary statistics (number of patients, mean,  
651 standard deviation, minimum, median, and maximum) of the pre- and post-dose differences in the  
652 mean values of the two measurements for each group will be obtained at baseline and at each time  
653 point of 8 or 16 weeks of the treatment period.

654 We will create a shift table for ECG abnormalities at week 0 (baseline) and 16  
655 (completion/discontinuation) of the treatment period and compare its frequency within groups using  
656 the Wilcoxon signed-rank test and between the placebo and E0302-50 mg groups using the  
657 Wilcoxon rank-sum test.

658

### 659 **6.7 Exploratory analyses**

660 None.

661

### 662 **6.8 The basis for setting the target number of subjects**

663 The target number of subjects in this study was set at 64 subjects in each group and 128 subjects in  
664 both groups. The rationale for setting the target number of subjects and the history of the change are  
665 described below.

666

#### 667 **Analysis method**

668 This study is a randomized controlled trial of two groups (placebo group and E0302 50 mg group)  
669 with the primary endpoint of the change in ALSFRS-R total score from baseline to week 16 of the  
670 treatment period, and validate the superiority of E0302 over placebo. In the MMRM model using a  
671 mixed-effects model, the change in ALSFRS-R total score from baseline to week 16 of the  
672 treatment period will be compared between the placebo group and the E0302 50 mg group. The  
673 results will be considered significant if the upper limit of the 95% confidence interval of the  
674 least-squares mean of the difference is greater than 0.

675

#### 676 **Endpoints and Estimates Used to Calculate Target Sample Size**

677 In Phase II/III study (E0302-J081-761), an estimate of the change in total ALSFRS-R scores was  
678 estimated using data from a subset of patients who experienced 1 year or less after the onset of  
679 symptoms at the beginning of the observation period and whose total ALSFRS-R scores decreased  
680 by 1-2 points during the observation period (12 weeks). The mean  $\pm$  SD change in ALSFRS-R

681 sum scores at 16 months were  $-3.2 \pm 4.0$  in the mecobalamin 50 mg group (26 patients in the  
 682 E0302-50-mg group in this study) and  $-5.8 \pm 5.0$  in the placebo group ( $n = 32$ ) (mean difference:  
 683  $-2.6$ ). Based on these results, the target sample size calculation for this study assumes that the  
 684 ALSFRS-R sum score for the E0302-50 mg group is  $-3.2$ , the ALSFRS-R sum score for the  
 685 placebo group is  $-5.8$ , and the E0302-50 mg group outperformed the placebo group by  $\Delta$  (2.6  
 686 points).

687 To account for the variation because of changes in ALS diagnostic criteria and participating centers  
 688 compared to the Phase II/III study (E0302-J081-761), we set a more significant standard deviation  
 689 (5.0) in the mecobalamin 50 mg group and the placebo group (in terms of change in ALSFRS-R  
 690 total score) as the standard SD across the study.

### 691 **Calculation of target sample size**

692 A minimum of 60 individuals per group will be required to achieve a type I error probability of  
 693 2.5% or less and a power of 80% or more in a one-sided test. In addition, in view of withdrawals  
 694 during the study, the target number of individuals for this study will be 64 per group, totaling 128.  
 695

#### 696 Two group *t*-test of equal means (equal *n*'s)

|                                                  |        |
|--------------------------------------------------|--------|
|                                                  | 1      |
| Test significance level, $\alpha$                | 0.025  |
| 1- or 2-sided test?                              | 1      |
| Group 1 mean, $\mu_1$                            | -3.200 |
| Group 2 mean, $\mu_2$                            | -5.800 |
| The difference in means, $\mu_1 - \mu_2$         | 2.600  |
| Common standard deviation, $\sigma$              | 5.000  |
| Effect size, $\delta =  \mu_1 - \mu_2  / \sigma$ | 0.520  |
| Power (%)                                        | 80     |
| <i>n</i> per group                               | 60     |

697  
 698  
 699

700 **7 Appendix**

701 None

702

703 **8 Reference material**

704 1) Protocol 5.0 Version (April 24, 2019).

705 2) Statistical analysis plan 1.1 Version (February 15, 2018)

706

707 **9 Citation**

708 None

709 10 Revision history  
710

| Version | Draft date | Main contents               | The Author(s)      |
|---------|------------|-----------------------------|--------------------|
| 1.1     | 2018.2.15  | First edition               | Tatsuo<br>Kagimura |
| 2.1     | 2020.3.24  | Final analysis plan version | Tatsuo<br>Kagimura |

711

712  
713  
714  
715  
716  
717  
718  
719  
720  
721  
722  
723  
724  
725  
726  
727  
728  
729  
730  
731  
732  
733  
734  
735  
736  
737  
738  
739

All or part of this material is not to be transferred, reproduced, published, or otherwise reproduced without prior permission from the Center for Medical Innovation (TRI).

Issue

〒650-0047 1-5-4, Minatoshima-Minami-cho, Chuo-ku, Kobe

Medical Innovation Promotion Center

TEL: 078-303-9107 FAX: 078-303-9094

URL: <http://www.tri-kobe.org>
