# Supplementary material
Source: PubMed Central journal article supplement (PMC9086935)
Supplement: jamaneurol-e220901-s003.pdf [file jamaneurol-e220901-s003.pdf]

## Supplementary Online Content

Oki R, Izumi Y, Fujita K, et al; Japan Early-Stage Trial of Ultrahigh-Dose Methylcobalamin for ALS (JETALS) Collaborators. Efficacy and safety of ultrahigh-dose methylcobalamin in early-stage amyotrophic lateral sclerosis: a randomized clinical trial. *JAMA Neurol*. Published online May 9, 2022. doi:10.1001/jamaneurol.2022.0901

**eFigure 1.** Trial Design

**eFigure 2.** Secondary Efficacy Outcomes (Full Analysis Set)

**eFigure 3.** Association Between Changes in ALSFRS-R and Homocysteine

**eTable 1.** Change in ALSFRS-R Total Score in the FAS (Sensitivity Analysis)

**eTable 2.** The Slope of ALSFRS-R Total Score in the FAS (Sensitivity Analysis)

**eTable 3.** Summary Statistics of ALSFRS-R Total Score and Subscore in the FAS

**eTable 4.** ALSFRS-R Total Score in Subset in the FAS

**eTable 5.** Summary of Severe Adverse Events by System Organ Class and Preferred Term

**eTable 6.** Summary of Treatment-Emergent Adverse Events by System Organ Class and Preferred Term

**eTable 7.** Summary of Electrocardiogram Parameter Before and After Administration

**eTable 8.** Summary of the Patients Who Met Possible and Suspected Grade by the El Escorial

**eAppendix 1.** Inclusion and Exclusion Criteria

**eAppendix 2.** Diagnostic Criteria

**eReferences**

**eAppendix 3.** Sample Size

**eAppendix 4.** Rationale for the Treatment Period of 16 Weeks

This supplementary material has been provided by the authors to give readers additional information about their work.

© 2022 American Medical Association. All rights reserved.

**eFigure 1.** Trial Design

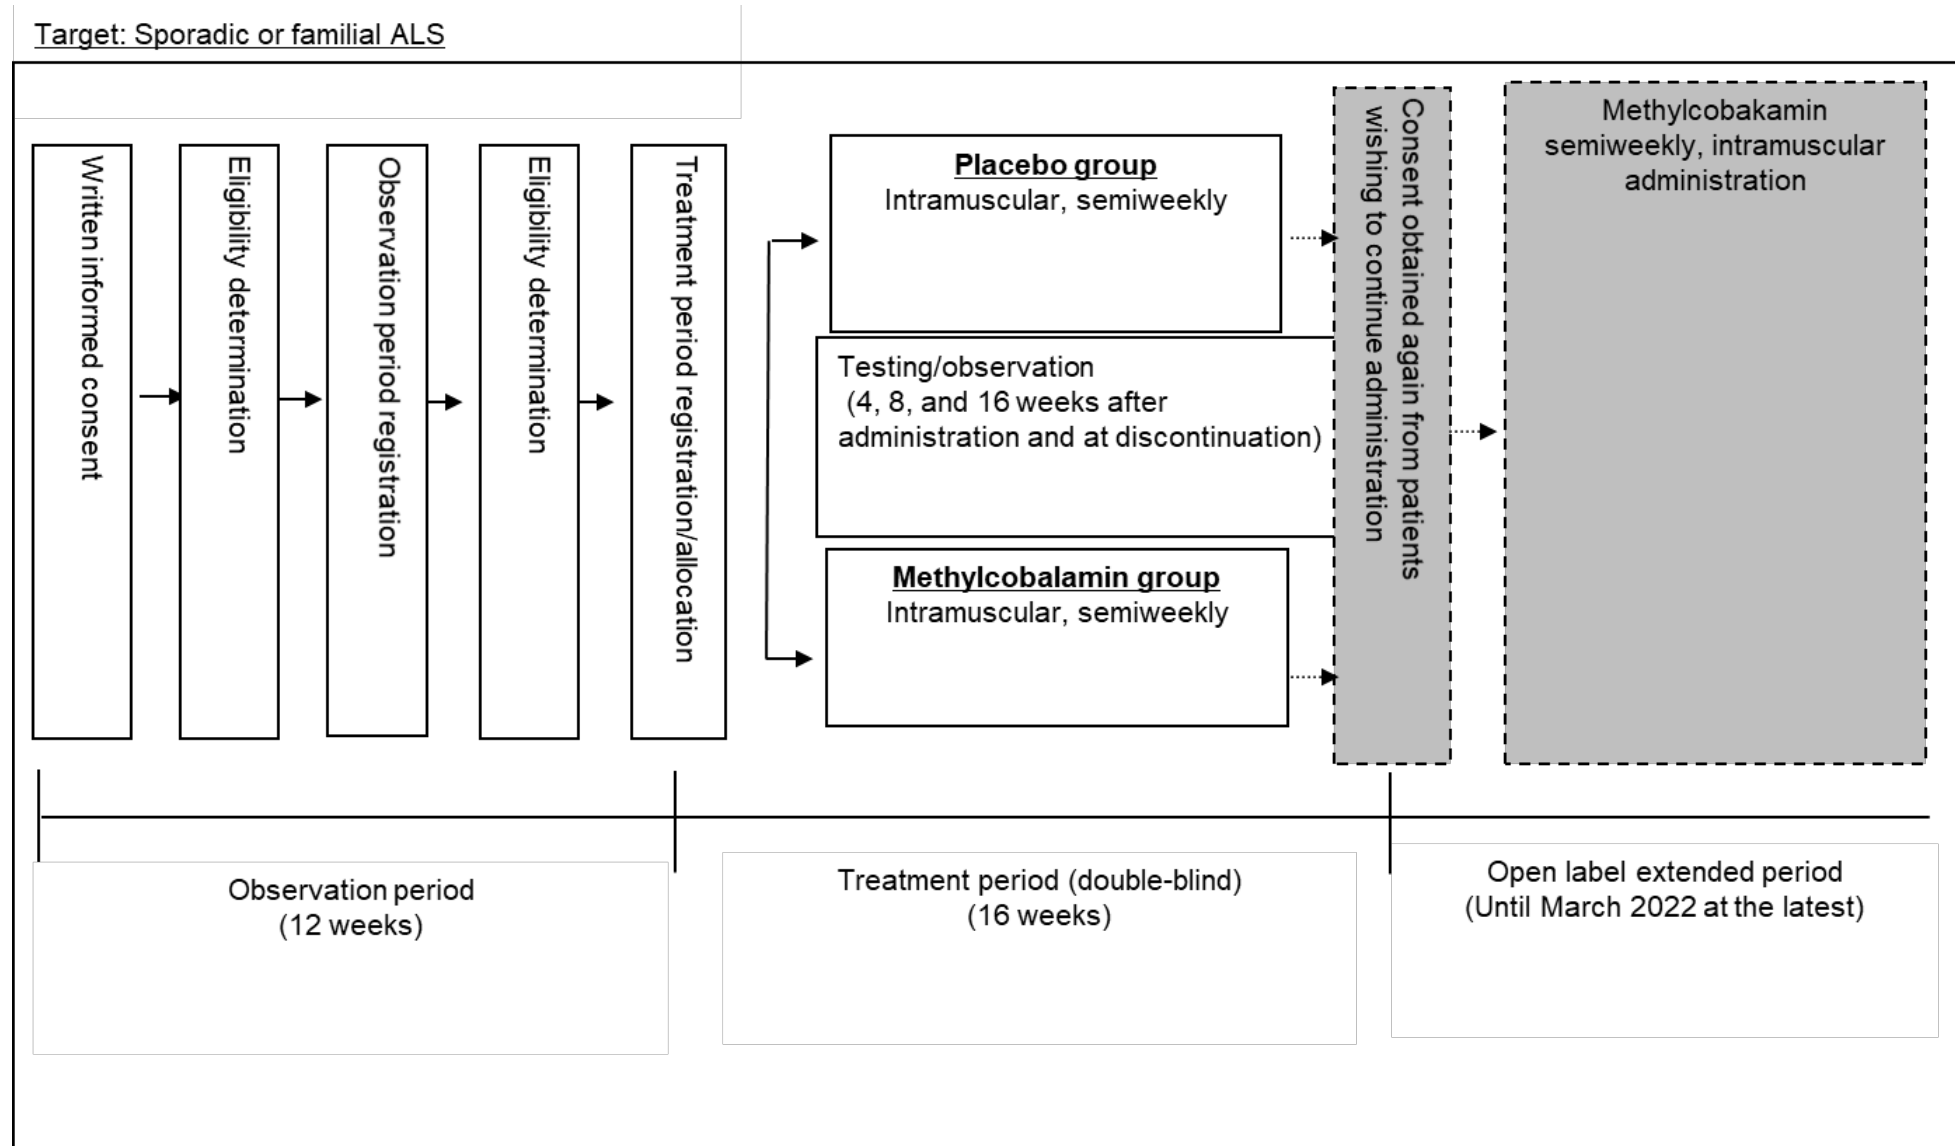

**eFigure 2.** Secondary Efficacy Outcomes (Full Analysis Set)

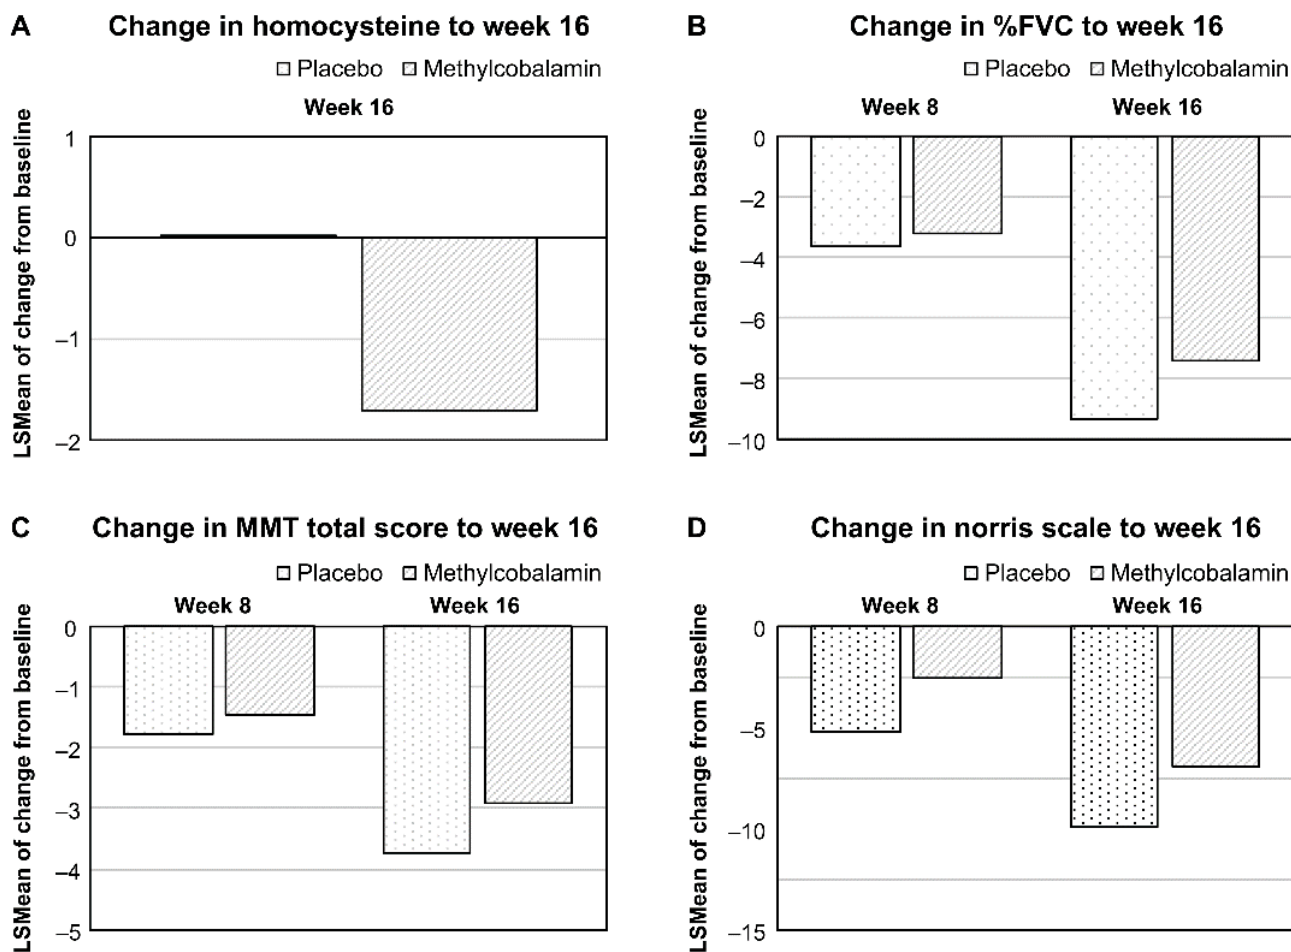

Panels A to D show the secondary efficacy outcomes. Data are shown as least-squares means. Panel A shows the change in the plasma homocysteine concentration from baseline to week 16. Panel B shows the change in % forced vital capacity (%FVC) from baseline to weeks 8 and 16. Panel C shows the variation in manual muscle test (MMT) total score from baseline to weeks 8 and 16. Panel D shows the variation in Norris scale total score from baseline to weeks 8 and 16.

**eFigure 3.** Association Between Changes in ALSFRS-R and Homocysteine

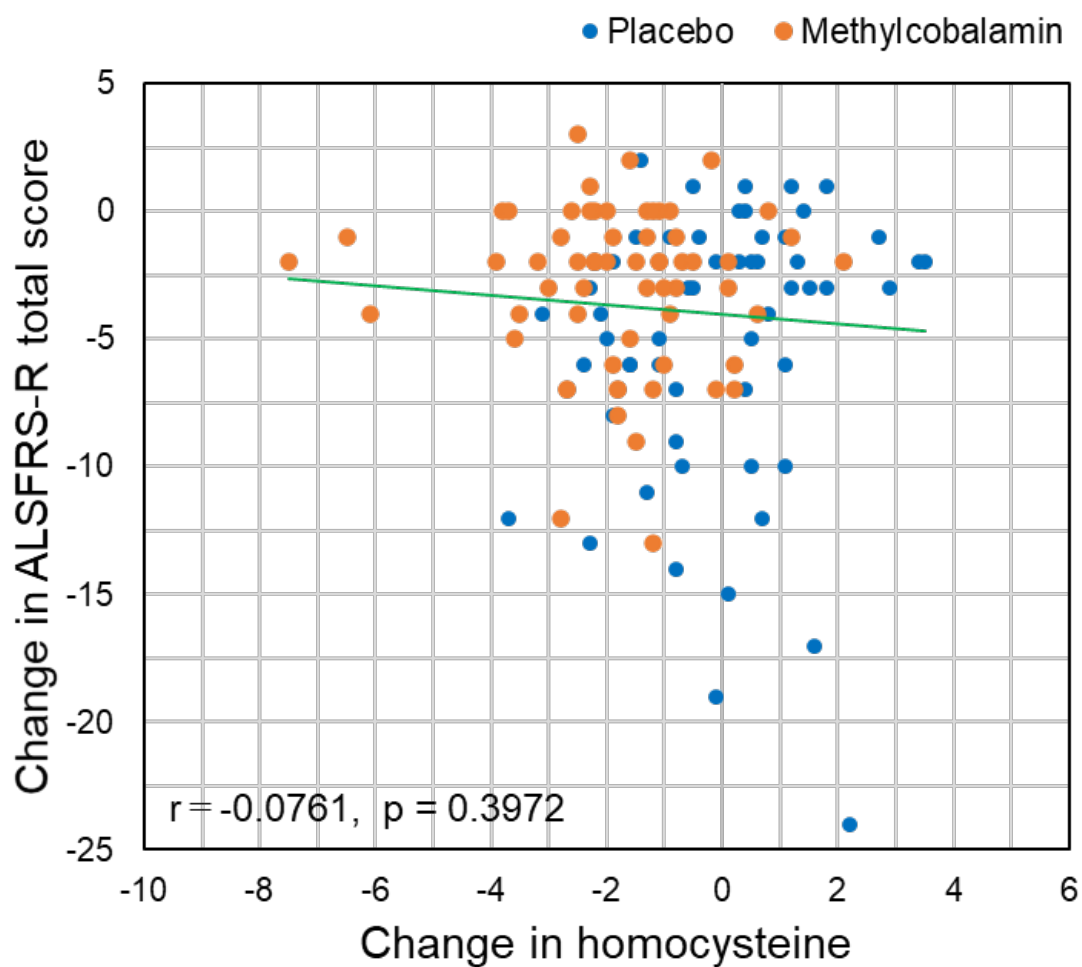

Figure S2 show the association between changes in the Revised Amyotrophic Lateral Sclerosis Functional Rating Scale (ALSFRS-R) and the plasma homocysteine concentration from baseline to week 16. Red and blue circles indicate the methylcobalamin and placebo groups, respectively. There were no associations between changes in ALSFRS-R total score and homocysteine.

**eTable 1.** Change in ALSFRS-R Total Score in the FAS (Sensitivity Analysis)

| <b>Change in ALSFRS-R Total Score</b> | <b>Placebo</b> | <b>Methylcobalamin</b> | <b>Difference (95% CI)</b> | <b>P value</b> |
|---------------------------------------|----------------|------------------------|----------------------------|----------------|
|                                       | (n = 64)       | (n = 65)               |                            |                |
| Change value from baseline to week 4  | -1.41 ± 0.23   | -0.43 ± 0.23           | 0.98 (0.33–1.63)           | 0.004          |
|                                       | (n = 64)       | (n = 64)               |                            |                |
| Change value from baseline to week 8  | -2.55 ± 0.34   | -1.57 ± 0.34           | 0.98 (0.03–1.93)           | 0.044          |
|                                       | (n = 63)       | (n = 63)               |                            |                |
| Change value from baseline to week 16 | -4.84 ± 0.55   | -2.89 ± 0.55           | 1.95 (0.42–3.48)           | 0.013          |

**eTable 2.** The Slope of ALSFRS-R Total Score in the FAS (Sensitivity Analysis)

|                                   | Statistics            | Group           | Estimated coefficient |        |         | Difference between coefficient |        |         |
|-----------------------------------|-----------------------|-----------------|-----------------------|--------|---------|--------------------------------|--------|---------|
|                                   |                       |                 | Estimated             | SE     | P value | Estimated                      | SE     | P value |
| Regression to the quadratic curve | Zero intercept        | Placebo         | 42.2822               | 0.3433 | <0.0001 |                                |        |         |
|                                   |                       | Methylcobalamin | 42.4914               | 0.3405 | <0.0001 |                                |        |         |
|                                   | Primary coefficient   | Placebo         | -0.0473               | 0.0077 | <0.0001 | -0.0213                        | 0.0109 | 0.052   |
|                                   |                       | Methylcobalamin | -0.0260               | 0.0077 | 0.0008  |                                |        |         |
|                                   | Secondary coefficient | Placebo         | 0.0000                | 0.0001 | 0.6581  | 0.0000                         | 0.0001 | 0.611   |
|                                   |                       | Methylcobalamin | -0.0000               | 0.0001 | 0.7820  |                                |        |         |
| Regression to the linear equation | Zero intercept        | Placebo         | 42.2487               | 0.3349 | <0.0001 |                                |        |         |
|                                   |                       | Methylcobalamin | 42.5119               | 0.3323 | <0.0001 |                                |        |         |
|                                   | Primary coefficient   | Placebo         | -0.0447               | 0.0051 | <0.0001 | -0.0171                        | 0.0072 | 0.018   |
|                                   |                       | Methylcobalamin | -0.0276               | 0.0051 | <0.0001 |                                |        |         |
|                                   | Slope (/week)         | Placebo         | -0.3129               | 0.0357 | <0.001  | -0.1197                        | 0.0504 | 0.018   |
|                                   |                       | Methylcobalamin | -0.1932               | 0.0357 | <0.001  |                                |        |         |

**eTable 3.** Summary Statistics of ALSFRS-R Total Score and Subscore in the FAS

| ALSFRS-R              |  | Group           | Visit    | n  | Mean  | SD   | Change from baseline |      |
|-----------------------|--|-----------------|----------|----|-------|------|----------------------|------|
|                       |  |                 |          |    |       |      | Mean                 | SD   |
| Total score           |  | Placebo         | Baseline | 64 | 42.31 | 2.68 |                      |      |
|                       |  |                 | Week 4   | 64 | 40.91 | 3.46 | -1.41                | 2.42 |
|                       |  |                 | Week 8   | 64 | 39.77 | 4.28 | -2.55                | 3.29 |
|                       |  |                 | Week 16  | 63 | 37.46 | 5.89 | -4.81                | 5.32 |
|                       |  | Methylcobalamin | Baseline | 65 | 42.40 | 2.58 |                      |      |
|                       |  |                 | Week 4   | 65 | 41.97 | 2.95 | -0.43                | 1.05 |
|                       |  |                 | Week 8   | 64 | 40.78 | 3.59 | -1.58                | 2.01 |
|                       |  |                 | Week 16  | 63 | 39.35 | 4.53 | -2.94                | 3.20 |
| Bulbar function       |  | Placebo         | Baseline | 64 | 10.61 | 1.71 |                      |      |
|                       |  |                 | Week 4   | 64 | 10.39 | 1.89 | -0.22                | 0.72 |
|                       |  |                 | Week 8   | 64 | 10.19 | 2.04 | -0.42                | 1.00 |
|                       |  |                 | Week 16  | 63 | 9.75  | 2.32 | -0.84                | 1.38 |
|                       |  | Methylcobalamin | Baseline | 65 | 10.48 | 2.18 |                      |      |
|                       |  |                 | Week 4   | 65 | 10.34 | 2.35 | -0.14                | 0.46 |
|                       |  |                 | Week 8   | 64 | 10.05 | 2.41 | -0.41                | 0.71 |
|                       |  |                 | Week 16  | 63 | 9.59  | 2.89 | -0.84                | 1.31 |
| Limb function (Total) |  | Placebo         | Baseline | 64 | 19.84 | 3.05 |                      |      |
|                       |  |                 | Week 4   | 64 | 18.70 | 3.95 | -1.14                | 2.10 |
|                       |  |                 | Week 8   | 64 | 17.86 | 4.56 | -1.98                | 2.68 |
|                       |  |                 | Week 16  | 63 | 16.37 | 5.50 | -3.46                | 3.98 |
|                       |  | Methylcobalamin | Baseline | 65 | 20.05 | 2.68 |                      |      |
|                       |  |                 | Week 4   | 65 | 19.75 | 2.81 | -0.29                | 0.72 |
|                       |  |                 | Week 8   | 64 | 18.97 | 3.43 | -1.06                | 1.51 |
|                       |  |                 | Week 16  | 63 | 18.02 | 4.35 | -1.97                | 2.49 |
| Limb function (Fine)  |  | Placebo         | Baseline | 64 | 9.88  | 1.82 |                      |      |
|                       |  |                 | Week 4   | 64 | 9.36  | 2.33 | -0.52                | 1.11 |
|                       |  |                 | Week 8   | 64 | 8.81  | 2.63 | -1.06                | 1.40 |
|                       |  |                 | Week 16  | 63 | 8.19  | 3.19 | -1.68                | 2.04 |
|                       |  | Methylcobalamin | Baseline | 65 | 9.91  | 1.72 |                      |      |
|                       |  |                 | Week 4   | 65 | 9.81  | 1.84 | -0.08                | 0.48 |
|                       |  |                 | Week 8   | 64 | 9.42  | 2.09 | -0.63                | 1.58 |
|                       |  |                 | Week 16  | 63 | 8.98  | 2.49 | -0.89                | 1.42 |
| Limb function (Gross) |  | Placebo         | Baseline | 64 | 9.97  | 2.00 |                      |      |
|                       |  |                 | Week 4   | 64 | 9.34  | 2.42 | -0.63                | 1.20 |
|                       |  |                 | Week 8   | 64 | 9.05  | 2.69 | -0.92                | 1.53 |

|                      |  |                 |          |    |       |      |       |      |
|----------------------|--|-----------------|----------|----|-------|------|-------|------|
|                      |  |                 | Week 16  | 63 | 8.17  | 3.08 | -1.78 | 2.19 |
|                      |  | Methylcobalamin | Baseline | 64 | 10.13 | 1.83 |       |      |
|                      |  |                 | Week 4   | 64 | 9.92  | 1.95 | -0.22 | 0.72 |
|                      |  |                 | Week 8   | 64 | 9.55  | 2.17 | -0.74 | 1.53 |
|                      |  |                 | Week 16  | 63 | 9.04  | 2.55 | -1.08 | 1.45 |
| Respiratory function |  | Placebo         | Baseline | 64 | 11.86 | 0.47 |       |      |
|                      |  |                 | Week 4   | 64 | 11.81 | 0.50 | 0.05  | 0.21 |
|                      |  |                 | Week 8   | 64 | 11.72 | 0.68 | -0.14 | 0.53 |
|                      |  |                 | Week 16  | 63 | 11.35 | 1.59 | -0.51 | 1.52 |
|                      |  | Methylcobalamin | Baseline | 65 | 11.88 | 0.38 |       |      |
|                      |  |                 | Week 4   | 65 | 11.88 | 0.33 | 0.00  | 0.31 |
|                      |  |                 | Week 8   | 64 | 11.77 | 0.56 | -0.11 | 0.48 |
|                      |  |                 | Week 16  | 63 | 11.75 | 0.51 | -0.13 | 0.46 |



**eTable 4.** ALSFRS-R Total Score in Subset in the FAS

| Visit                                                                        | Placebo |                                           |                                             | Methylcobalamin |                                           |                                             | Difference<br>(95% CI) | P value |
|------------------------------------------------------------------------------|---------|-------------------------------------------|---------------------------------------------|-----------------|-------------------------------------------|---------------------------------------------|------------------------|---------|
|                                                                              | n       | ALSFRS-R<br>total score<br>(Mean ±<br>SD) | Change from<br>baseline<br>(LSMean ±<br>SE) | n               | ALSFRS-R<br>total score<br>(Mean ±<br>SD) | Change from<br>baseline<br>(LSMean ±<br>SE) |                        |         |
| <b>Age &lt;65 (years)</b>                                                    |         |                                           |                                             |                 |                                           |                                             |                        |         |
| Baseline                                                                     | 34      | 42.88 ±<br>1.56                           |                                             | 33              | 42.41 ±<br>2.52                           |                                             |                        |         |
| Week<br>16                                                                   | 32      | 37.55 ±<br>6.45                           | −4.76 ± 0.94                                | 33              | 40.03 ±<br>4.27                           | −1.74 ± 0.95                                | 3.02 (0.60–5.45)       | 0.015   |
| <b>Age ≥65 (years)</b>                                                       |         |                                           |                                             |                 |                                           |                                             |                        |         |
| Baseline                                                                     | 31      | 41.71 ±<br>3.44                           |                                             | 31              | 42.39 ±<br>2.69                           |                                             |                        |         |
| Week<br>16                                                                   | 30      | 37.37 ±<br>5.31                           | −3.38 ± 0.77                                | 31              | 38.65 ±<br>4.75                           | −2.74 ± 0.78                                | 0.65 (−1.23–<br>2.52)  | 0.494   |
| <b>Sex—Male</b>                                                              |         |                                           |                                             |                 |                                           |                                             |                        |         |
| Baseline                                                                     | 40      | 42.23 ±<br>2.48                           |                                             | 34              | 42.50 ±<br>2.43                           |                                             |                        |         |
| Week<br>16                                                                   | 39      | 36.44 ±<br>6.33                           | −5.03 ± 0.91                                | 32              | 40.25 ±<br>3.89                           | −1.29 ± 0.97                                | 3.74 (1.50–5.99)       | 0.001   |
| <b>Sex—Female</b>                                                            |         |                                           |                                             |                 |                                           |                                             |                        |         |
| Baseline                                                                     | 24      | 42.46 ±<br>3.05                           |                                             | 31              | 42.29 ±<br>2.78                           |                                             |                        |         |
| Week<br>16                                                                   | 24      | 39.13 ±<br>4.76                           | −3.31 ± 0.77                                | 31              | 38.42 ±<br>5.00                           | −3.95 ± 0.72                                | −0.64 (−2.57–<br>1.30) | 0.511   |
| <b>Initial symptom—Bulbar onset</b>                                          |         |                                           |                                             |                 |                                           |                                             |                        |         |
| Baseline                                                                     | 19      | 43.11 ±<br>2.18                           |                                             | 19              | 41.47 ±<br>2.29                           |                                             |                        |         |
| Week<br>16                                                                   | 19      | 39.68 ±<br>5.13                           | −3.50 ± 1.03                                | 19              | 37.79 ±<br>4.47                           | −3.44 ± 1.02                                | 0.06 (−2.71–<br>2.82)  | 0.967   |
| <b>Initial symptom—Limb onset</b>                                            |         |                                           |                                             |                 |                                           |                                             |                        |         |
| Baseline                                                                     | 45      | 41.98 ±<br>2.82                           |                                             | 46              | 42.78 ±<br>2.62                           |                                             |                        |         |
| Week<br>16                                                                   | 44      | 36.50 ±<br>5.99                           | −5.43 ± 0.74                                | 44              | 40.02 ±<br>4.44                           | −2.40 ± 0.75                                | 3.02 (1.14–4.90)       | 0.002   |
| <b>Time from onset to registration at the observation period ≤9 (months)</b> |         |                                           |                                             |                 |                                           |                                             |                        |         |

|                                                                                    |    |                 |              |    |                 |              |                        |       |
|------------------------------------------------------------------------------------|----|-----------------|--------------|----|-----------------|--------------|------------------------|-------|
| Baseline                                                                           | 32 | 42.28 ±<br>3.14 |              | 37 | 42.97 ±<br>2.52 |              |                        |       |
| Week<br>16                                                                         | 31 | 37.03<br>±6.38  | -5.04 ± 0.85 | 36 | 39.58 ±<br>4.74 | -3.08 ± 0.81 | 1.96 (-0.19–<br>4.12)  | 0.074 |
| <b>Time from onset to registration at the observation period 9 to ≤12 (months)</b> |    |                 |              |    |                 |              |                        |       |
| Baseline                                                                           | 32 | 42.34 ±<br>2.18 |              | 28 | 41.64 ±<br>2.51 |              |                        |       |
| Week<br>16                                                                         | 32 | 37.88 ±<br>5.45 | -4.10 ± 0.87 | 27 | 39.04 ±<br>4.31 | -1.94 ± 0.95 | 2.16 (-0.12–<br>4.43)  | 0.063 |
| <b>%FVC at baseline &lt;90%</b>                                                    |    |                 |              |    |                 |              |                        |       |
| Baseline                                                                           | 27 | 41.85 ±<br>2.74 |              | 28 | 41.68 ±<br>2.45 |              |                        |       |
| Week<br>16                                                                         | 27 | 35.44 ±<br>6.17 | -6.22 ± 1.05 | 28 | 37.18 ±<br>4.56 | -4.26 ± 1.05 | 1.97 (-0.87–<br>4.81)  | 0.171 |
| <b>%FVC at baseline ≥90%</b>                                                       |    |                 |              |    |                 |              |                        |       |
| Baseline                                                                           | 37 | 42.65 ±<br>2.63 |              | 37 | 42.95 ±<br>2.58 |              |                        |       |
| Week<br>16                                                                         | 36 | 38.97 ±<br>5.26 | -3.51 ± 0.80 | 35 | 41.09 ±<br>3.73 | -1.33 ± 0.83 | 2.18 (0.62–3.75)       | 0.007 |
| <b>Concomitant use of riluzole—No</b>                                              |    |                 |              |    |                 |              |                        |       |
| Baseline                                                                           | 6  | 42.83 ±<br>2.86 |              | 7  | 44.00 ±<br>2.38 |              |                        |       |
| Week<br>16                                                                         | 6  | 39.17 ±<br>5.46 | -5.70 ± 1.97 | 6  | 39.83 ±<br>3.66 | -5.93 ± 1.98 | -0.23 (-6.04–<br>5.58) | 0.930 |
| <b>Concomitant use of riluzole—Yes</b>                                             |    |                 |              |    |                 |              |                        |       |
| Baseline                                                                           | 58 | 42.26 ±<br>2.69 |              | 58 | 42.21 ±<br>2.56 |              |                        |       |
| Week<br>16                                                                         | 57 | 37.28 ±<br>5.95 | -4.68 ± 0.67 | 57 | 39.30 ±<br>4.64 | -2.57 ± 0.67 | 2.11 (0.46–3.76)       | 0.013 |
| <b>Edaravone use before registration—No</b>                                        |    |                 |              |    |                 |              |                        |       |
| Baseline                                                                           | 58 | 42.26 ±<br>2.71 |              | 61 | 42.48 ±<br>2.54 |              |                        |       |
| Week<br>16                                                                         | 57 | 37.21 ±<br>5.92 | -5.03 ± 0.59 | 59 | 39.59 ±<br>4.41 | -2.73 ± 0.58 | 2.30 (0.69–3.91)       | 0.005 |
| <b>Edaravone use before registration—Yes</b>                                       |    |                 |              |    |                 |              |                        |       |

|                                                                                                                   |    |                 |              |    |                 |              |                       |       |
|-------------------------------------------------------------------------------------------------------------------|----|-----------------|--------------|----|-----------------|--------------|-----------------------|-------|
| Baseline                                                                                                          | 6  | 42.83 ±<br>2.56 |              | 4  | 41.25 ±<br>3.40 |              |                       |       |
| Week<br>16                                                                                                        | 6  | 39.83 ±<br>5.49 |              | 4  | 35.75 ±<br>5.50 |              |                       |       |
| <b>BMI &lt;18.5</b>                                                                                               |    |                 |              |    |                 |              |                       |       |
| Baseline                                                                                                          | 9  | 41.89 ±<br>1.83 |              | 9  | 41.33 ±<br>2.65 |              |                       |       |
| Week<br>16                                                                                                        | 8  | 36.88 ±<br>3.14 | -5.80 ± 1.32 | 9  | 38.11 ±<br>4.88 | -3.99 ± 1.49 | 1.81 (-2.09–<br>5.71) | 0.327 |
| <b>BMI ≥18.5</b>                                                                                                  |    |                 |              |    |                 |              |                       |       |
| Baseline                                                                                                          | 55 | 42.38 ±<br>2.81 |              | 56 | 42.57 ±<br>2.56 |              |                       |       |
| Week<br>16                                                                                                        | 55 | 37.55 ±<br>6.21 | -4.59 ± 0.69 | 54 | 39.56 ±<br>4.48 | -2.58 ± 0.69 | 2.01 (0.30–3.72)      | 0.022 |
| <b>Diagnostic grade by the updated Awaji criteria—Definite</b>                                                    |    |                 |              |    |                 |              |                       |       |
| Baseline                                                                                                          | 16 | 41.31 ±<br>3.70 |              | 23 | 41.52 ±<br>2.25 |              |                       |       |
| Week<br>16                                                                                                        | 16 | 37.31 ±<br>5.20 | -4.00 ± 1.03 | 23 | 38.65 ±<br>4.22 | -2.94 ± 0.90 | 1.06 (-1.50–<br>3.63) | 0.404 |
| <b>Diagnostic grade by the updated Awaji criteria—Probable and Probable laboratory-supported</b>                  |    |                 |              |    |                 |              |                       |       |
| Baseline                                                                                                          | 48 | 42.65 ±<br>2.20 |              | 42 | 42.88 ±<br>2.65 |              |                       |       |
| Week<br>16                                                                                                        | 47 | 37.51 ±<br>6.16 | -4.98 ± 0.76 | 40 | 39.75 ±<br>4.71 | -2.72 ± 0.82 | 2.26 (0.33–4.19)      | 0.022 |
| <b>Diagnostic grade by the El Escorial revised Airlie House diagnostic criteria—Definite</b>                      |    |                 |              |    |                 |              |                       |       |
| Baseline                                                                                                          | 10 | 41.10 ±<br>4.18 |              | 12 | 41.00 ±<br>2.34 |              |                       |       |
| Week<br>16                                                                                                        | 10 | 36.60 ±<br>4.30 | -5.00 ± 1.30 | 12 | 36.50 ±<br>4.46 | -4.96 ± 1.19 | 0.04 (-3.42–<br>3.50) | 0.981 |
| <b>Diagnostic grade by the El Escorial revised Airlie House diagnostic criteria—Probable</b>                      |    |                 |              |    |                 |              |                       |       |
| Baseline                                                                                                          | 30 | 42.47 ±<br>2.26 |              | 30 | 42.40 ±<br>2.71 |              |                       |       |
| Week<br>16                                                                                                        | 30 | 38.10 ±<br>5.95 | -4.08 ± 0.92 | 29 | 39.55 ±<br>4.03 | -2.45 ± 0.93 | 1.63 (-0.68–<br>3.94) | 0.164 |
| <b>Diagnostic grade by the El Escorial revised Airlie House diagnostic criteria—Probable laboratory-supported</b> |    |                 |              |    |                 |              |                       |       |
| Baseline                                                                                                          | 20 | 42.20 ±<br>2.38 |              | 19 | 43.26 ±<br>2.16 |              |                       |       |
| Week<br>16                                                                                                        | 20 | 36.00 ±         | -5.40 ± 1.15 | 18 | 40.83 ±         | -1.64 ± 1.26 | 3.76 (0.79–6.73)      | 0.012 |

|                                                                                                            |    |                 |              |    |                 |              |                       |       |
|------------------------------------------------------------------------------------------------------------|----|-----------------|--------------|----|-----------------|--------------|-----------------------|-------|
| 16                                                                                                         |    | 6.41            |              |    | 4.55            |              |                       |       |
| <b>MRC score in neck flexor at the end of the observation period 5</b>                                     |    |                 |              |    |                 |              |                       |       |
| Baseline                                                                                                   | 48 | 42.65 ±<br>2.55 |              | 40 | 42.85 ±<br>2.40 |              |                       |       |
| Week<br>16                                                                                                 | 48 | 37.88 ±<br>5.83 | -4.44 ± 0.70 | 39 | 40.51 ±<br>3.89 | -1.88 ± 0.79 | 2.56 (0.68–4.44)      | 0.008 |
| <b>MRC score in neck flexor at the end of the observation period ≤4</b>                                    |    |                 |              |    |                 |              |                       |       |
| Baseline                                                                                                   | 16 | 41.31 ±<br>2.91 |              | 25 | 41.68 ±<br>2.75 |              |                       |       |
| Week<br>16                                                                                                 | 15 | 36.13 ±<br>6.10 | -5.16 ± 1.26 | 24 | 37.46 ±<br>4.93 | -4.75 ± 1.10 | 0.41 (-2.46–<br>3.28) | 0.774 |
| <b>ALS severity grade (Japan ALS severity classification) at the end of the observation period—Grade 1</b> |    |                 |              |    |                 |              |                       |       |
| Baseline                                                                                                   | 21 | 43.62 ±<br>1.28 |              | 21 | 44.10 ±<br>2.41 |              |                       |       |
| Week<br>16                                                                                                 | 21 | 39.29 ±<br>4.85 | -4.44 ± 0.86 | 20 | 42.15 ±<br>3.70 | -1.68 ± 0.84 | 2.76 (0.70–4.82)      | 0.010 |
| <b>ALS severity grade (Japan ALS severity classification) at the end of the observation period—Grade 2</b> |    |                 |              |    |                 |              |                       |       |
| Baseline                                                                                                   | 43 | 41.67 ±<br>2.96 |              | 44 | 41.59 ±<br>2.28 |              |                       |       |
| Week<br>16                                                                                                 | 42 | 36.55 ±<br>6.20 | -4.78 ± 0.79 | 43 | 38.05 ±<br>4.31 | -3.05 ± 0.79 | 1.73 (-0.30–<br>3.76) | 0.094 |
| <b>Change in ALSFRS-R total score from baseline to the end of the observation period—2 points</b>          |    |                 |              |    |                 |              |                       |       |
| Baseline                                                                                                   | 28 | 41.32 ±<br>3.38 |              | 31 | 41.71 ±<br>2.49 |              |                       |       |
| Week<br>16                                                                                                 | 27 | 34.43 ±<br>6.48 | -6.11 ± 1.13 | 30 | 38.00 ±<br>4.40 | -3.11 ± 1.09 | 3.01 (0.37–5.64)      | 0.026 |
| <b>Change in ALSFRS-R total score from baseline to the end of the observation period—1 point</b>           |    |                 |              |    |                 |              |                       |       |
| Baseline                                                                                                   | 36 | 43.08 ±<br>1.66 |              | 34 | 43.03 ±<br>2.54 |              |                       |       |
| Week<br>16                                                                                                 | 36 | 39.72 ±<br>4.25 | -3.27 ± 0.63 | 33 | 40.58 ±<br>4.35 | -2.19 ± 0.65 | 1.09 (-0.63–<br>2.81) | 0.212 |
| <b>ALSFRS-R total score at the end of the observation period ≤37</b>                                       |    |                 |              |    |                 |              |                       |       |
| Baseline                                                                                                   | 3  | 34.00 ±<br>2.65 |              | 1  | 36.00           |              |                       |       |
| Week<br>16                                                                                                 | 3  | 32.33 ±<br>5.13 |              | 1  | 29.00           |              |                       |       |
| <b>ALSFRS-R total score at the end of the observation period 38 to 42</b>                                  |    |                 |              |    |                 |              |                       |       |

|                                                                      |    |                 |              |    |                 |              |                       |       |
|----------------------------------------------------------------------|----|-----------------|--------------|----|-----------------|--------------|-----------------------|-------|
| Baseline                                                             | 24 | 40.79 ±<br>1.28 |              | 31 | 40.42 ±<br>1.52 |              |                       |       |
| Week<br>16                                                           | 24 | 35.50 ±<br>4.85 | -5.40 ± 1.01 | 31 | 37.19 ±<br>4.02 | -3.36 ± 0.92 | 2.05 (-0.26-<br>4.35) | 0.080 |
| <b>ALSFRS-R total score at the end of the observation period ≥43</b> |    |                 |              |    |                 |              |                       |       |
| Baseline                                                             | 37 | 43.97 ±<br>1.01 |              | 33 | 44.45 ±<br>1.33 |              |                       |       |
| Week<br>16                                                           | 36 | 39.19 ±<br>6.05 | -4.54 ± 0.80 | 31 | 41.84 ±<br>3.39 | -2.07 ± 0.89 | 2.47 (0.27-4.67)      | 0.029 |

**eTable 5.** Summary of Severe Adverse Events by System Organ Class and Preferred Term

|                                                  | Placebo  | Methylcobalamin |
|--------------------------------------------------|----------|-----------------|
| System organ class / Preferred term              | (n = 64) | (n = 65)        |
| Number of patients                               | 2 (3)    | 1 (2)           |
| Nervous system disorders                         | 1 (2)    | 0 (0)           |
| Cerebral infarction                              | 1 (2)    | 0 (0)           |
| Respiratory, thoracic, and mediastinal disorders | 1 (2)    | 0 (0)           |
| Tracheal stenosis                                | 1 (2)    | 0 (0)           |
| Surgical and medical procedures                  | 0 (0)    | 1 (2)           |
| Hemorrhoid operation                             | 0 (0)    | 1 (2)           |
|                                                  |          |                 |

**eTable 6.** Summary of Treatment-Emergent Adverse Events by System Organ Class and Preferred Term

| System Organ Class /Preferred Term                   | Placebo (n = 64) |          |        |       |
|------------------------------------------------------|------------------|----------|--------|-------|
|                                                      | Mild             | Moderate | Severe | Total |
| The number of patients                               | 1 (2)            | 0 (0)    | 0 (0)  | 1 (2) |
| Gastrointestinal disorders                           | 0 (0)            | 0 (0)    | 0 (0)  | 0 (0) |
| Constipation                                         | 0 (0)            | 0 (0)    | 0 (0)  | 0 (0) |
| General disorders and administration site conditions | 0 (0)            | 0 (0)    | 0 (0)  | 0 (0) |
| Injection site pain                                  | 0 (0)            | 0 (0)    | 0 (0)  | 0 (0) |
| Pyrexia                                              | 0 (0)            | 0 (0)    | 0 (0)  | 0 (0) |
| Investigations                                       | 0 (0)            | 0 (0)    | 0 (0)  | 0 (0) |
| Electrocardiogram QT prolonged                       | 0 (0)            | 0 (0)    | 0 (0)  | 0 (0) |
| Skin and subcutaneous tissue disorders               | 0 (0)            | 0 (0)    | 0 (0)  | 0 (0) |
| Rash                                                 | 0 (0)            | 0 (0)    | 0 (0)  | 0 (0) |
| Nervous system disorders                             | 1 (2)            | 0 (0)    | 0 (0)  | 1 (2) |
| Hypoesthesia                                         | 1 (2)            | 0 (0)    | 0 (0)  | 1 (2) |
|                                                      |                  |          |        |       |

| System Organ Class /Preferred Term                   | Methylcobalamin (n = 65) |          |        |         |
|------------------------------------------------------|--------------------------|----------|--------|---------|
|                                                      | Mild                     | Moderate | Severe | Total   |
| The number of patients                               | 5 (8)                    | 0 (0)    | 0 (0)  | 5 (7.7) |
| Gastrointestinal disorders                           | 1 (2)                    | 0 (0)    | 0 (0)  | 1 (2)   |
| Constipation                                         | 1 (2)                    | 0 (0)    | 0 (0)  | 1 (2)   |
| General disorders and administration site conditions | 2 (3)                    | 0 (0)    | 0 (0)  | 2 (3)   |
| Injection site pain                                  | 1 (2)                    | 0 (0)    | 0 (0)  | 1 (2)   |
| Pyrexia                                              | 1 (2)                    | 0 (0)    | 0 (0)  | 1 (2)   |
| Investigations                                       | 1 (2)                    | 0 (0)    | 0 (0)  | 1 (2)   |
| Electrocardiogram QT prolonged                       | 1 (2)                    | 0 (0)    | 0 (0)  | 1 (2)   |
| Skin and subcutaneous tissue disorders               | 1 (2)                    | 0 (0)    | 0 (0)  | 1 (2)   |
| Rash                                                 | 1 (2)                    | 0 (0)    | 0 (0)  | 1 (2)   |
| Nervous system disorders                             | 0 (0)                    | 0 (0)    | 0 (0)  | 0 (0)   |
| Hypoesthesia                                         | 0 (0)                    | 0 (0)    | 0 (0)  | 0 (0)   |
|                                                      |                          |          |        |         |

**eTable 7.** Summary of Electrocardiogram Parameter Before and After Administration

| Parameter          | Analysis date | Period                       | Group           | n  | Mean  | SD    | Change from baseline |       |         |
|--------------------|---------------|------------------------------|-----------------|----|-------|-------|----------------------|-------|---------|
|                    |               |                              |                 |    |       |       | Mean                 | SD    | P value |
| RR interval (msec) | Baseline      | Before administration        | Placebo         | 64 | 825.7 | 158.5 |                      |       |         |
|                    |               |                              | Methylcobalamin | 65 | 870.1 | 138.1 |                      |       |         |
|                    |               | 2 hours after administration | Placebo         | 64 | 824.7 | 149.3 | -1.0                 | 108.8 | 0.776   |
|                    |               |                              | Methylcobalamin | 65 | 863.5 | 148.3 | -6.6                 | 90.9  |         |
|                    | Week 8-≤16    | Before administration        | Placebo         | 64 | 812.7 | 157.8 |                      |       |         |
|                    |               |                              | Methylcobalamin | 63 | 875.4 | 123.3 |                      |       |         |
|                    |               | 2 hours after administration | Placebo         | 64 | 843.7 | 149.6 | 31.0                 | 96.4  | 0.087   |
|                    |               |                              | Methylcobalamin | 63 | 893.1 | 140.4 | 17.8                 | 87.9  |         |
| PR interval (msec) | Baseline      | Before administration        | Placebo         | 64 | 165.8 | 20.7  |                      |       |         |
|                    |               |                              | Methylcobalamin | 65 | 162.5 | 18.4  |                      |       |         |
|                    |               | 2 hours after administration | Placebo         | 64 | 165.5 | 20.9  | -0.3                 | 8.6   | 0.818   |
|                    |               |                              | Methylcobalamin | 65 | 163.0 | 19.0  | 0.6                  | 7.1   |         |
|                    | Week 8-≤16    | Before administration        | Placebo         | 64 | 163.9 | 21.3  |                      |       |         |
|                    |               |                              | Methylcobalamin | 63 | 167.8 | 41.1  |                      |       |         |
|                    |               | 2 hours after administration | Placebo         | 64 | 165.0 | 22.7  | 1.1                  | 7.7   | 0.538   |
|                    |               |                              | Methylcobalamin | 63 | 162.7 | 20.8  | -5.1                 | 40.3  |         |
| QRS width (msec)   | Baseline      | Before administration        | Placebo         | 64 | 95.6  | 12.8  |                      |       |         |
|                    |               |                              | Methylcobalamin | 65 | 97.9  | 18.2  |                      |       |         |
|                    |               | 2 hours after administration | Placebo         | 64 | 94.3  | 12.0  | -1.3                 | 8.0   | 0.079   |
|                    |               |                              | Methylcobalamin | 65 | 97.9  | 17.8  | 0.1                  | 3.3   |         |
|                    | Week 8-≤16    | Before administration        | Placebo         | 64 | 93.9  | 12.1  |                      |       |         |
|                    |               |                              | Methylcobalamin | 63 | 99.4  | 19.7  |                      |       |         |
|                    |               | 2 hours after administration | Placebo         | 64 | 94.9  | 11.6  | 1.0                  | 4.1   | 0.385   |
|                    |               |                              | Methylcobalamin | 63 | 98.3  | 18.8  | -1.1                 | 7.2   |         |
| QT interval (msec) | Baseline      | Before administration        | Placebo         | 64 | 387.7 | 33.3  |                      |       |         |
|                    |               |                              | Methylcobalamin | 65 | 394.2 | 28.6  |                      |       |         |
|                    |               | 2 hours after administration | Placebo         | 64 | 389.5 | 31.8  | 1.8                  | 21.6  | 0.929   |
|                    |               |                              | Methylcobalamin | 65 | 394.7 | 30.3  | 0.6                  | 17.6  |         |
|                    | Week 8-≤16    | Before administration        | Placebo         | 64 | 385.9 | 32.2  |                      |       |         |
|                    |               |                              | Methylcobalamin | 63 | 430.7 | 237.3 |                      |       |         |
|                    |               | 2 hours after administration | Placebo         | 64 | 391.9 | 33.2  | 6.0                  | 18.2  | 0.054   |
|                    |               |                              | Methylcobalamin | 63 | 403.5 | 34.1  | -27.1                | 234.6 |         |
|                    |               |                              |                 |    |       |       |                      |       |         |



| Parameter   | Analysis date | Period                       | Group           | n  | Mean  | SD   | Change from baseline |           |               |
|-------------|---------------|------------------------------|-----------------|----|-------|------|----------------------|-----------|---------------|
|             |               |                              |                 |    |       |      | Mean                 | Parameter | Analysis date |
| QTcB (msec) | Baseline      | Before administration        | Placebo         | 64 | 428.8 | 18.2 |                      |           |               |
|             |               |                              | Methylcobalamin | 65 | 424.5 | 20.8 |                      |           |               |
|             |               | 2 hours after administration | Placebo         | 64 | 429.4 | 19.4 | 0.6                  | 10.3      | 0.687         |
|             |               |                              | Methylcobalamin | 65 | 426.4 | 22.6 | 1.9                  | 9.8       |               |
|             | Week 8–≤16    | Before administration        | Placebo         | 64 | 426.8 | 18.7 |                      |           |               |
|             |               |                              | Methylcobalamin | 63 | 428.1 | 24.3 |                      |           |               |
|             |               | 2 hours after administration | Placebo         | 64 | 428.7 | 20.7 | 1.9                  | 10.5      | 0.512         |
|             |               |                              | Methylcobalamin | 63 | 428.5 | 25.3 | 0.4                  | 9.7       |               |
| QTcF (msec) | Baseline      | Before administration        | Placebo         | 64 | 414.2 | 16.9 |                      |           |               |
|             |               |                              | Methylcobalamin | 65 | 413.6 | 18.4 |                      |           |               |
|             |               | 2 hours after administration | Placebo         | 64 | 415.3 | 17.7 | 1.1                  | 10.7      | 0.885         |
|             |               |                              | Methylcobalamin | 65 | 415.2 | 19.3 | 1.6                  | 7.9       |               |
|             | Week 8–≤16    | Before administration        | Placebo         | 64 | 412.3 | 18.3 |                      |           |               |
|             |               |                              | Methylcobalamin | 63 | 418.3 | 23.1 |                      |           |               |
|             |               | 2 hours after administration | Placebo         | 64 | 415.5 | 19.5 | 3.2                  | 10.1      | 0.509         |
|             |               |                              | Methylcobalamin | 63 | 419.5 | 24.8 | 1.2                  | 9.2       |               |

**eTable 8.** Summary of the Patients Who Met Possible and Suspected Grade by the El Escorial Revised Airlie House Diagnostic Criteria

| Age | Sex | Initial symptom | Time from onset (month) | Severity | ALSFRS-R | %FVC  | UAC ¶     | rEEC †    |
|-----|-----|-----------------|-------------------------|----------|----------|-------|-----------|-----------|
| 70  | M   | Upper limb      | 12                      | 1        | 47       | 99.7  | Pro-lab ‡ | Possible  |
| 58  | F   | Lower limb      | 12                      | 2        | 45       | 100.8 | Pro-lab   | Possible  |
| 75  | F   | Bulbar          | 10                      | 1        | 43       | 82.9  | Definite  | Possible  |
| 54  | F   | Upper limb      | 11                      | 1        | 46       | 132.9 | Probable  | Possible  |
| 85  | F   | Bulbar          | 5                       | 2        | 40       | 80.3  | Pro-lab   | Possible  |
| 69  | M   | Upper limb      | 10                      | 2        | 45       | 110.9 | Pro-lab   | Possible  |
| 70  | M   | Upper limb      | 8                       | 2        | 47       | 93.5  | Pro-lab   | Possible  |
| 44  | M   | Upper limb      | 6                       | 1        | 46       | 104.9 | Definite  | Possible  |
| 78  | F   | Bulbar          | 4                       | 2        | 40       | 123.5 | Definite  | Possible  |
| 60  | F   | Upper limb      | 11                      | 1        | 45       | 101.6 | Pro-lab   | Possible  |
| 67  | M   | Upper limb      | 8                       | 1        | 43       | 102.2 | Pro-lab   | Possible  |
| 59  | M   | Upper limb      | 11                      | 1        | 47       | 101.1 | Probable  | Suspected |

Character of the patients who met possible and suspected grade by the El Escorial Revised Airlie House Diagnostic Criteria at the registration of the observation period were listed.

¶ UAC; The updated Awaji criteria

† rEEC; The El Escorial Revised Airlie House Diagnostic Criteria

Pro-lab: Probable laboratory-supported

## **eAppendix 1. Inclusion and Exclusion Criteria**

### **Inclusion Criteria**

- (1) Patients who provided written consent to participate in this study
- (2) Patients aged  $\geq 20$  years at the time of providing informed consent
- (3) Patients diagnosed with sporadic or familial ALS corresponding to the categories of definite, probable, or probable laboratory-supported in the updated Awaji criteria
- (4) Patients who were within 1 year of symptom onset at the beginning of the observation period
- (5) Patients whose ALSFRS-R total score decreased by 1 or 2 points during the observation period (12 weeks)
- (6) Patients rated as Grade 1 or 2 according to the Japan ALS severity classification (Grades 1–5, with Grade 5 being most severe)
- (7) Patients seen on an outpatient basis

## **Exclusion Criteria**

- (1) Patients who have undergone tracheostomy
- (2) Patients who are using a noninvasive respiratory support device
- (3) Patients with  $\leq 60\%$  FVC
- (4) Patients with chronic obstructive pulmonary disorder (COPD)
- (5) Patients with signs and symptoms of vitamin B12 deficiency
- (6) Patients who have received edaravone within 4 weeks before the observation period registration
- (7) Patients who have started riluzole or changed the dosage or discontinued it after giving informed consent
- (8) Patients with cognitive impairment
- (9) Patients who are or may be pregnant
- (10) Patients with a serious respiratory disorder, cardiovascular disease, or liver or kidney disease
- (11) Patients with a malignant tumor
- (12) Patients who have participated in another trial within the 12 weeks prior to giving informed consent
- (13) Patients with present illness or history of drug allergy or severe allergic disease (anaphylactic shock)
- (14) Patients who are determined to be unsuitable for this study by the investigator or sub-investigator

## **eAppendix 2. Diagnostic Criteria**

The conventional Airlie House criteria have been widely used in clinical trials (Brooks et al. 2000). We adopted the Airlie House criteria in the previous trial (Kaji et al. 2019). The Airlie House criteria evaluate clinical and neurophysiological upper and lower motor neuron (UMN and LMN) dysfunction in four body regions (cranial, cervical, thoracic, and lumbosacral) and the diagnostic categories depend on the distribution of UMN and LMN dysfunction. It comprises four categories (definite, probable, probable-laboratory supported, and possible) and most clinical trials required a category of definite, probable, or probable-laboratory supported for diagnosis. Although the conventional Airlie House criteria has shown a high specificity, their low diagnostic sensitivity, especially in early stages, has been considered an issue (Costa, Swash, and de Carvalho 2012). To facilitate early diagnosis, the original Awaji criteria proposed that 1) neurophysiological features of LMN dysfunction including chronic and ongoing neurogenic changes were equivalent to clinical LMN signs and 2) fasciculation potentials and unstable motor units on needle electromyography were deemed to be a biomarker of ongoing denervation when combined with chronic neurogenic changes (de Carvalho et al. 2008). In fact, the original Awaji criteria were reported to accelerate the diagnosis by an average of 6 months compared to the Airlie House criteria (Okita et al. 2011). On the other hand, other studies reported that the original Awaji criteria had a lower sensitivity, a finding attributed to the omission of a “probable-laboratory supported” diagnostic category, in which a clinical upper motor neuron sign is required in one region (Higashihara et al. 2012)(Jang, Ph, and Bae 2014). Thereafter, the novel updated Awaji criteria, which reinclude the category of probable-laboratory supported, were advocated as an algorithm for combining the advantages of the Airlie House and original Awaji criteria; the updated Awaji criteria have higher sensitivity than the Airlie House and original Awaji criteria (Geevasinga et al. 2016). Therefore, the Japanese

Pharmaceuticals and Medical Devices Agency approved the adoption of the updated Awaji criteria in this trial on the condition that we would also document the diagnostic categories of the Airlie House criteria to compare their diagnostic sensitivity.

## eReferences

- Brooks BR, Miller RG, Swash M, Munsat TL. El Escorial revisited: Revised criteria for the diagnosis of amyotrophic lateral sclerosis. *Amyotroph Lateral Scler*. 2000;1(5):293-299.
- Kaji R, Imai T, Iwasaki Y, et al. Ultra-high-dose methylcobalamin in amyotrophic lateral sclerosis: A long-term phase II/III randomised controlled study. *J Neurol Neurosurg Psychiatry*. 2019;90(4):451-457.
- de Carvalho M, Dengler R, Eisen A, et al. Electrodiagnostic criteria for diagnosis of ALS. *Clin Neurophysiol*. 2008;119(3):497-503.
- Costa J, Swash M, de Carvalho M. Awaji criteria for the diagnosis of amyotrophic lateral sclerosis: A systematic review. *Arch Neurol*. 2012;69(11):1410-1416.
- Okita T, Nodera H, Shibuta Y, et al. Can Awaji ALS criteria provide earlier diagnosis than the revised El Escorial criteria? *J Neurol Sci*. 2011;302(1-2):29-32.
- Higashihara M, Sonoo M, Imafuku I, et al. Fasciculation potentials in amyotrophic lateral sclerosis and the diagnostic yield of the awaji algorithm. *Muscle and Nerve*. 2012;45(2):175-182. doi:10.1002/mus.22299
- Jang J, Ph D, Bae JS. The Awaji Criteria are not Always Superior to the Previous Criteria: A Meta-Analysis. *Muscle and Nerve*. 2015; 51(6):822-829.
- Geevasinga N, Macaskill P, Schrooten M, et al. Awaji criteria improves the diagnostic sensitivity in

amyotrophic lateral sclerosis: A systematic review using individual patient data. *Clin Neurophysiol.*

2016;127(7):2684-2691.

### **eAppendix 3. Sample Size**

To determine the target patient profile, we compared the effect size of the change in total ALSFRS-R score at week 16 between early-stage patients (enrolled within 1 year of onset) with 1–2 points reduction and those with 1–3 points reduction in ALSFRS-R total score during the 12-week observation period in the previous trial (Kaji et al. 2019); the effect size was larger in the patients with 1–2 points reduction than those with 1–3 points reduction (data not shown) and thus we set the former as the target profile. In the sub-analysis of 58 patients who met the target profile (the placebo group, n=32; methylcobalamin 50 mg group, n=26), the change in ALSFRS-R total score at 16 weeks of the treatment period was  $-3.23 \pm 4.01$  points in the methylcobalamin group and  $-5.84 \pm 4.95$  points in the placebo group (difference 2.61, 95% CI 0.15–5.06, P = 0.008). Based on these results, we reasoned that the score of ALSFRS-R total score in the methylcobalamin group would exceed that in the placebo group by 2.6 points if with the target profile. The required number of patients to set the type I error probability to  $\leq 2.5\%$  in the one-sided tests and to set the statistical power to  $\geq 80\%$  was a minimum of 60 patients per group based on subgroup results. Considering that there would be discontinuations during the trial, the target number of patients for this trial was determined to be 64 patients per group.

- Kaji R, Imai T, Iwasaki Y, et al. Ultra-high-dose methylcobalamin in amyotrophic lateral sclerosis: A long-term phase II/III randomised controlled study. *J Neurol Neurosurg Psychiatry.* 2019;90(4):451-457.

#### **eAppendix 4. Rationale for the Treatment Period of 16 Weeks**

In the previous trial, the ALSFRS-R was evaluated at week 4 and thereafter every 12 weeks, i.e., week 16, week 28, and eventually week 182 of the treatment (double-blind) period. Therefore, unfortunately we had no data at week 24 to be validated. To strictly validate the findings of the post hoc analysis of the previous trial, we could have selected 16 weeks or 28 weeks for the double-blind period. Considering the feasibility, 16 weeks was selected. Alternatively, we might have been able to set 24 weeks as the double-blind period and evaluate the ALSFRS-R at both weeks 16 and 24. In this case, however, we could have had a problem of determining the treatment duration for the primary outcome. If the change at week 16 had been set as the primary outcome, week 24 would not have been necessary; if the change at week 24 had been set as the primary outcome, the trial would not have been a validation; and if the changes at both weeks 16 and 24 had been set as the primary outcomes, multiple comparisons problem should have been considered and the statistical power might have been reduced for each point.
